# Supplementary material
Source: publisher site journal article supplement (https://www.spandidos-publications.com/594/downloadSupplementary)
Supplement: Supplementary file 1 [file downloadSupplementary]

## Sheet: FPKM for bulk
Table SI. Gene expression in irradiated KYSE-180 (FPKM).
gene_id	gene_short_name	locus	RA0	RA2	RA6	RA12	RA18	RA24	RA30
ENSG00000000971	CFH	1:196651877-196747504	2.58777	2.23122	3.31369	4.71943	6.90056	4.07618	4.28236
ENSG00000003096	KLHL13	X:117897812-118117340	4.0574	4.20526	2.41018	3.91875	2.09899	2.25127	1.64245
ENSG00000003436	TFPI	2:187464229-187565760	8.54458	2.26141	3.26401	4.88017	7.71974	3.50198	4.25532
ENSG00000003989	SLC7A2	8:17497087-17570573	1.19875	0.446416	0.653886	0.626035	0.689534	0.623696	0.267408
ENSG00000004779	NDUFAB1	16:23581001-23596356	57.9746	93.1696	78.2175	83.736	66.6865	96.5333	67.147
ENSG00000004799	PDK4	7:95583498-95596491	0.509602	0.179402	0.36322	0.840305	0.535523	0.594761	0.744107
ENSG00000005001	PRSS22	16:2852726-2858170	29.3646	35.632	47.8648	52.7931	58.4649	36.6911	55.3405
ENSG00000005243	COPZ2	17:48026166-48038030	8.87866	5.93701	5.89914	10.8924	8.4782	7.196	8.00281
ENSG00000005884	ITGA3	17:50055967-50090481	56.7188	69.7091	82.9379	93.197	77.6051	59.8402	87.4032
ENSG00000006007	GDE1	16:19501688-19522145	61.8268	50.7225	46.2628	49.2712	47.4151	51.1971	36.0991
ENSG00000006118	TMEM132A	11:60924462-60937159	27.5913	8.79171	12.1605	13.7332	16.7582	13.3147	15.8831
ENSG00000006283	CACNA1G	17:50561067-50627474	1.94045	0.547958	0.714953	0.475741	1.21328	0.621161	0.9063
ENSG00000006652	IFRD1	7:112422967-112481017	18.8537	38.2114	36.0535	32.2823	41.1539	33.3576	41.0001
ENSG00000007312	CD79B	17:63928739-63932354	0.285621	0.353753	0.12197	0.0609028	0	0.757348	0.212729
ENSG00000007384	RHBDF1	16:58058-76355	16.2303	10.981	14.5649	17.677	19.9021	13.4189	22.8711
ENSG00000008513	ST3GAL1	8:133454847-133571940	5.65937	11.7312	14.0608	11.8566	10.3349	8.49958	10.5241
ENSG00000008517	IL32	16:3065296-3082192	3.38258	2.77542	5.53999	20.5093	6.3774	4.49271	7.07352
ENSG00000010278	CD9	12:6199714-6238271	181.927	118.263	168.602	209.479	180.135	195.119	176.462
ENSG00000010810	FYN	6:111660331-111873452	14.8605	9.80882	8.43432	10.6271	11.4857	6.04182	8.28064
ENSG00000011028	MRC2	17:62627400-62693597	11.492	3.39249	5.49023	7.37794	8.27374	5.89446	6.13236
ENSG00000011376	LARS2	3:45388505-45549421	7.92563	8.65105	9.47934	10.3421	6.73718	8.88771	7.88459
ENSG00000011422	PLAUR	19:43646094-43670547	7.97224	11.2079	12.7143	18.6944	20.3772	15.9591	25.902
ENSG00000012124	CD22	19:35319260-35347355	2.88404	1.71736	2.05444	1.93891	4.26334	3.57483	3.7593
ENSG00000012779	ALOX5	10:45374175-45446119	3.66977	0.913391	1.47599	1.80378	1.80696	1.37106	1.36036
ENSG00000012822	CALCOCO1	12:53708516-53727745	27.397	5.27693	7.18987	11.2529	13.5423	12.0172	10.2764
ENSG00000012963	UBR7	14:93207055-93229215	14.2992	16.2771	13.6658	14.2087	15.2404	15.4876	9.81253
ENSG00000013288	MAN2B2	4:6575174-6623362	17.5505	6.73008	8.49654	10.39	9.0539	8.28645	6.75959
ENSG00000019186	CYP24A1	20:54153448-54173973	2.68292	1.9663	3.38434	6.00692	6.73714	5.91874	10.249
ENSG00000019505	SYT13	11:45240300-45286319	18.9321	8.12512	8.32186	8.06343	8.30479	8.12908	4.74367
ENSG00000019582	CD74	5:150401636-150412929	70.4411	30.2116	44.6961	46.7193	47.6158	48.7427	46.509
ENSG00000021826	CPS1	2:210477681-210679107	0.14487	0.0412677	0.271948	0.426762	0.57002	0.082396	0.222044
ENSG00000023445	BIRC3	11:102317449-102339403	10.6061	12.1346	18.2988	27.1338	23.6972	16.5249	25.7657
ENSG00000023572	GLRX2	1:193096467-193106114	13.9032	31.0642	23.7945	22.5468	20.1803	21.8869	20.6708
ENSG00000023909	GCLM	1:93885204-93909456	12.9669	31.5988	26.7412	28.6626	21.0295	21.6678	22.8781
ENSG00000025039	RRAGD	6:89364635-89412270	3.45393	2.60252	3.26779	4.397	5.39707	2.58725	3.89873
ENSG00000026025	VIM	10:17228258-17237593	7.23894	11.4638	17.2675	24.6575	23.9608	17.0155	19.7639
ENSG00000026559	KCNG1	20:51003655-51023129	28.3306	20.9834	19.1295	24.4445	15.514	19.0701	15.9619
ENSG00000026751	SLAMF7	1:160739056-160754821	0.0762758	0.0600299	0.0966437	0.565264	0.227544	0.144011	0.676269
ENSG00000027697	IFNGR1	6:137197483-137219449	14.8356	12.9435	18.0642	18.9145	20.4829	17.9709	19.5327
ENSG00000028137	TNFRSF1B	1:12167002-12209228	4.41129	1.57196	2.44408	2.74702	3.09112	2.22051	1.85978
ENSG00000028277	POU2F2	19:42086109-42196585	0.0948009	0.476219	0.0867553	0.232822	1.23516	0.472969	0.291045
ENSG00000030582	GRN	17:44345085-44353102	201.631	70.3246	98.306	128.813	139.843	111.561	115.263
ENSG00000035141	FAM136A	2:70295974-70302090	30.2136	55.4573	46.9372	44.8386	42.1463	43.7767	43.8862
ENSG00000037280	FLT4	5:180601505-180649624	1.84548	0.468383	0.884853	1.30897	0.811644	0.816433	0.859609
ENSG00000037474	NSUN2	5:6599238-6633291	66.0549	126.615	116.452	107.695	112.736	95.6079	113.261
ENSG00000038382	TRIO	5:14143701-14532128	36.5329	44.8762	53.069	59.2459	55.8099	34.8201	58.7199
ENSG00000039068	CDH1	16:68737224-68835548	121.055	69.1308	99.1784	105.047	97.466	95.9813	85.3027
ENSG00000041982	TNC	9:115019577-115118257	1.63139	5.55442	7.85759	5.40242	3.80368	2.66957	4.67915
ENSG00000047617	ANO2	12:5531868-5946232	6.68156	1.78009	1.90474	2.29309	3.32077	1.93347	2.39731
ENSG00000048052	HDAC9	7:18086948-19002416	3.49461	2.97728	4.52843	5.3069	5.89812	3.28552	4.95183
ENSG00000049239	H6PD	1:9234774-9271337	22.7558	7.50346	9.11321	12.1746	11.048	7.63216	6.79842
ENSG00000049323	LTBP1	2:32946971-33399509	15.5566	5.15657	7.33192	8.99051	7.09741	8.59321	6.82934
ENSG00000049540	ELN	7:74027788-74069907	2.76463	0.965139	1.19015	1.13994	0.853045	1.43789	1.64399
ENSG00000050344	NFE2L3	7:26152239-26187125	30.3061	18.078	32.8764	52.7907	33.7357	30.4331	29.7445
ENSG00000050405	LIMA1	12:50175787-50283546	53.7505	126.34	126.819	108.066	112.715	110.516	104.797
ENSG00000050767	COL23A1	5:178237617-178590555	3.36537	0.686084	1.56219	1.82072	1.7182	1.29022	0.983311
ENSG00000052344	PRSS8	16:31131432-31135762	42.1934	15.2824	20.8395	27.41	28.9936	30.8791	27.3089
ENSG00000052749	RRP12	10:97356357-97426076	5.71998	14.3651	14.8294	13.1918	13.0934	14.0178	17.2782
ENSG00000053254	FOXN3	14:89124870-89619149	23.257	9.04313	10.5877	8.28769	9.11847	8.59354	5.34004
ENSG00000053747	LAMA3	18:23689442-23955066	12.7259	35.8098	51.9795	43.0474	39.4224	26.437	56.6092
ENSG00000054793	ATP9A	20:51596513-51768634	10.9086	4.63062	6.22073	8.55079	7.86682	6.69309	6.24273
ENSG00000055163	CYFIP2	5:157266078-157395595	1.27694	0.387143	0.6688	0.718015	0.481714	1.25384	0.376419
ENSG00000055483	USP36	17:78787380-78841441	9.56742	14.9864	14.401	16.0513	16.3874	11.2287	18.8695
ENSG00000058085	LAMC2	1:183186237-183244900	70.5779	104.267	153.532	166.39	119.836	81.3448	141.114
ENSG00000058404	CAMK2B	7:44217149-44334577	4.46943	1.30226	1.90744	2.81342	2.51959	1.73591	1.83353
ENSG00000059804	SLC2A3	12:7919229-7936275	45.7906	13.3649	30.048	35.3134	28.6743	45.7484	46.0225
ENSG00000060982	BCAT1	12:24810021-24949459	0.891551	0.122652	0.319489	0.29876	0.410357	0.392065	0.477096
ENSG00000062038	CDH3	16:68636188-68722616	70.5383	46.2848	69.465	63.307	74.9092	74.675	80.4027
ENSG00000062038	CDH3	16:68696143-68696923	1.53694	0.568711	0.973303	2.03128	0.737978	1.66912	0.960613
ENSG00000064225	ST3GAL6	3:98732235-98821201	1.41752	0.576106	0.423388	1.34282	1.21536	0.818675	1.08285
ENSG00000064300	NGFR	17:49495292-49515017	2.71182	0.84689	1.34401	2.18437	2.68836	1.42452	1.84625
ENSG00000064687	ABCA7	19:1040100-1065572	11.7459	7.46059	5.94522	11.5427	9.21183	7.79415	12.1942
ENSG00000065268	WDR18	19:984270-998438	15.4259	20.406	20.8653	17.4907	15.5399	25.0461	16.6527
ENSG00000065320	NTN1	17:9021541-9244000	10.4376	6.549	8.32844	11.3248	7.92046	6.69051	6.47291
ENSG00000065328	MCM10	10:13161553-13211104	10.3848	20.1471	16.5502	15.067	13.8822	13.6663	13.032
ENSG00000065485	PDIA5	3:123067061-123225227	13.4367	7.27638	7.35318	13.5782	10.809	9.24829	9.08395
ENSG00000065548	ZC3H15	2:186486155-186509363	38.3432	70.1637	62.49	57.2542	54.645	56.691	59.689
ENSG00000065600	TMEM206	1:212363930-212414901	7.43873	6.1343	9.47214	8.52251	9.14753	8.51474	8.38173
ENSG00000065618	COL17A1	10:104031285-104086002	0.43111	0.497466	0.644569	1.75438	0.921627	2.01346	3.56155
ENSG00000066027	PPP2R5A	1:212285536-212361863	35.3173	28.9698	27.6604	25.8153	22.8237	26.2448	16.8995
ENSG00000066468	FGFR2	10:121478333-121598458	69.2339	25.9693	33.8843	30.8048	27.408	28.9065	15.5881
ENSG00000066629	EML1	14:99737692-99942060	2.45786	2.94308	1.84768	3.7685	2.88193	2.1833	2.74456
ENSG00000066926	FECH	18:57548282-57586772	11.1155	7.90292	7.72761	9.60354	6.70136	7.62691	4.4697
ENSG00000067082	KLF6	10:3775995-3785281	8.47138	14.3344	21.1245	25.2415	26.311	15.4017	23.3133
ENSG00000067141	NEO1	15:73051709-73305206	34.0445	15.7724	22.7822	22.5604	21.9496	21.6011	17.212
ENSG00000069399	BCL3	19:44747704-44760044	6.63203	19.5108	13.3335	11.7898	11.6949	11.7134	18.3754
ENSG00000069482	GAL	11:68683778-68691175	52.2273	164.771	136.208	110.516	109.623	112.244	124.058
ENSG00000069702	TGFBR3	1:91680342-91906335	20.6807	11.1717	10.1582	12.1798	8.85142	10.0732	6.62752
ENSG00000070190	DAPP1	4:99816832-99870154	2.64799	3.82357	4.22212	4.6546	5.38171	2.60097	5.19124
ENSG00000070669	ASNS	7:97852117-97872542	35.5573	28.3156	38.7984	42.4297	56.5322	44.2813	34.4929
ENSG00000070814	TCOF1	5:150357638-150400308	17.7999	43.3166	40.837	40.2816	36.8027	35.2698	43.6147
ENSG00000070886	EPHA8	1:22563563-22603594	3.53069	3.11251	3.0783	1.84328	2.03514	2.39162	1.92418
ENSG00000071967	CYBRD1	2:171522246-171558133	34.6881	9.4251	11.8047	17.0483	19.3279	15.533	9.48894
ENSG00000072274	TFRC	3:196027182-196082189	36.1651	103.718	119.472	65.9737	74.1057	64.0445	68.6671
ENSG00000073008	PVR	19:44643797-44663583	14.8552	38.2397	44.028	40.8345	37.2687	25.8492	39.4388
ENSG00000073282	TP63	3:189631415-189897279	1.27175	0.780237	1.11861	1.0651	1.81898	1.73678	2.82976
ENSG00000073536	NLE1	17:35128752-35142315	3.68283	13.4061	11.8206	12.246	10.2087	11.0571	11.5593
ENSG00000073711	PPP2R3A	3:135965672-136147891	5.7609	6.12843	4.81638	6.74169	4.40636	4.92502	3.3646
ENSG00000073737	DHRS9	2:169064788-169096167	0.193404	0.488755	0.750372	0.764082	1.45584	1.44449	3.50855
ENSG00000073756	PTGS2	1:186671790-186680427	0.595081	0.221005	0.477093	0.522477	0.503768	0.161992	0.374775
ENSG00000073910	FRY	13:32031299-32299122	1.6791	0.51491	0.659966	1.67516	1.46997	0.602774	0.677435
ENSG00000074370	ATP2A3	17:3923869-3964464	12.1954	4.70294	6.05677	6.80933	6.33539	6.17106	4.96927
ENSG00000074416	MGLL	3:127689061-127823250	5.09365	7.41574	3.97995	10.8446	8.05034	12.2377	7.12344
ENSG00000074590	NUAK1	12:106063339-106140033	3.15625	3.79739	4.31089	5.14026	4.56243	2.78923	2.95527
ENSG00000075213	SEMA3A	7:83955776-84492724	55.2353	22.5205	29.2043	31.2887	25.277	19.2742	10.0167
ENSG00000075391	RASAL2	1:178094140-178484147	15.1034	29.2476	25.8918	21.541	22.3519	13.3469	14.5272
ENSG00000075673	ATP12A	13:24680410-24712493	0.558545	0.0847652	0.118778	0.183022	0.1785	0.0865181	0.0991205
ENSG00000076716	GPC4	X:133300102-133415490	21.3106	9.33326	14.0401	14.7846	15.3477	12.1686	10.4393
ENSG00000077942	FBLN1	22:45502237-45601135	148.678	41.3114	52.502	61.8164	61.031	64.1285	51.1381
ENSG00000078018	MAP2	2:209424057-209734118	1.52134	0.517305	0.637953	0.583237	0.903831	0.523635	1.36719
ENSG00000078081	LAMP3	3:183122212-183163839	7.89346	1.77328	2.91666	3.28937	3.63606	3.1753	2.21448
ENSG00000078177	N4BP2	4:40056825-40158252	1.54028	1.25357	1.78516	1.90225	1.90961	1.00756	1.00275
ENSG00000079101	CLUL1	18:596987-650334	2.59784	0.152753	0.332091	0.140752	1.33708	0.87358	0.438656
ENSG00000079215	SLC1A3	5:36606354-36688334	254.598	88.2982	126.56	123.058	105.96	110.182	80.7301
ENSG00000079385	CEACAM1	19:42507303-42561234	2.30869	1.47565	1.28923	3.02324	3.36306	2.44216	4.25115
ENSG00000079931	MOXD1	6:132296054-132401545	6.62812	2.22758	2.48419	3.68509	3.69388	4.33469	2.39339
ENSG00000080503	SMARCA2	9:2015218-2193624	1.97832	1.1754	1.53694	1.70888	1.7746	3.7619	2.01506
ENSG00000080573	COL5A3	19:9959560-10010471	0.448965	0.036005	0.135143	0.140401	0.161747	0.222358	0.153675
ENSG00000080608	PUM3	9:2720468-2844241	6.75361	15.0793	14.7916	12.9315	13.3064	12.2794	14.8954
ENSG00000081189	MEF2C	5:88717116-88904257	1.0109	0.180485	0.304185	0.550388	0.627356	0.2237	0.214408
ENSG00000081479	LRP2	2:169127108-169362685	0.97861	0.0114405	0.0227734	0.177492	0.1285	0.123429	0.0224241
ENSG00000082482	KCNK2	1:215005774-215237093	0.386652	0.351532	0.22055	0.688846	0.506806	0.123558	0.445462
ENSG00000083720	OXCT1	5:41730064-41870519	37.6952	77.0229	69.819	60.2281	62.7915	47.6946	51.1021
ENSG00000083750	RRAGB	X:55717738-55758774	5.40639	3.15315	1.43714	4.97183	2.26808	2.26306	3.54316
ENSG00000084623	EIF3I	1:32221927-32231604	80.2545	147.251	131.182	130.126	117.981	133.019	133.992
ENSG00000084710	EFR3B	2:25042129-25159137	2.03026	0.535322	0.741176	0.61589	0.793979	0.876109	0.629658
ENSG00000084731	KIF3C	2:25926595-25982749	13.3527	7.72118	6.75356	10.99	8.99718	7.57085	10.7391
ENSG00000085276	MECOM	3:169083498-169663618	0.784098	0.0185499	0.21606	0.127314	0.128966	0.359277	0.140738
ENSG00000085415	SEH1L	18:12947132-12987536	35.0822	70.4473	56.1026	47.16	49.3733	44.8267	41.2399
ENSG00000086730	LAT2	7:74199651-74229834	2.50602	0.736515	0.89642	2.01083	2.02267	1.37617	2.79894
ENSG00000087074	PPP1R15A	19:48872391-48876057	23.3117	15.427	20.2324	22.8926	31.5169	20.4184	31.1998
ENSG00000087128	TMPRSS11E	4:68447448-68497604	0.138196	0.177373	0.263822	0.266117	0.658253	0.209189	0.427967
ENSG00000087269	NOP14	4:2937932-2963385	9.99951	23.3705	20.7967	17.3483	17.3652	17.2339	18.5201
ENSG00000087301	TXNDC16	14:52430589-52552522	9.16893	3.19917	3.98714	4.77498	4.59727	3.80446	3.20414
ENSG00000087494	PTHLH	12:27958083-27972705	0.888612	1.65912	1.09251	2.14408	2.55978	1.87656	5.32449
ENSG00000087842	PIR	X:15384798-15493564	23.0596	22.9045	23.6415	25.1536	20.1775	30.1582	27.7227
ENSG00000088002	SULT2B1	19:48552074-48599425	5.22211	1.44671	1.49845	1.81951	2.93766	2.58184	1.31065
ENSG00000088205	DDX18	2:117814649-117832379	26.3105	53.3253	43.9642	40.7326	34.5407	34.261	35.3368
ENSG00000088340	FER1L4	20:35558736-35607562	5.89041	3.10771	2.92444	4.5996	5.45286	3.39953	7.35485
ENSG00000088386	SLC15A1	13:98683800-98752654	1.75572	0.34749	0.839368	1.2814	1.37471	0.990966	1.15014
ENSG00000088970	KIZ	20:21125982-21246622	13.3133	7.36909	6.61815	6.64943	6.29084	8.08871	4.53757
ENSG00000089195	TRMT6	20:5937234-5950558	9.55129	20.0961	18.4173	16.4647	19.3317	15.5719	17.4806
ENSG00000090238	YPEL3	16:30092313-30096915	21.6007	7.47084	7.51409	9.33715	13.8172	11.2409	13.6054
ENSG00000090273	NUDC	1:26900237-26946862	40.9653	74.3848	65.7212	63.4954	62.9357	72.8817	74.6017
ENSG00000091129	NRCAM	7:108147622-108456717	5.93365	1.08224	1.23829	1.44336	1.04658	1.56701	0.877084
ENSG00000091136	LAMB1	7:107923798-108003255	142.578	86.7161	136.161	139.033	120.656	116.904	110.744
ENSG00000092068	SLC7A8	14:23125294-23183674	0.700499	0.1941	0.531928	0.389833	0.717454	0.494023	1.04409
ENSG00000092096	SLC22A17	14:23346305-23352912	23.7882	6.52573	7.89709	9.38638	8.81906	9.18258	6.88299
ENSG00000092621	PHGDH	1:119659797-119744215	100.368	71.5496	84.7614	78.0065	106.458	100.116	69.4468
ENSG00000092969	TGFB2	1:218346234-218444619	9.96825	21.9572	42.315	47.1274	38.3188	20.562	25.9296
ENSG00000095303	PTGS1	9:122370529-122395703	8.35031	1.77936	2.64987	2.39923	2.48149	3.7111	1.82323
ENSG00000095397	DFNB31	9:114402079-114505450	7.29639	4.62147	4.20326	5.8463	5.6704	4.23665	6.71444
ENSG00000095596	CYP26A1	10:93073474-93077890	0.794918	0.931592	1.51258	0.983115	2.38983	1.79885	2.17142
ENSG00000095752	IL11	19:55364388-55370463	2.57293	4.30693	5.19208	4.54672	5.76856	2.95691	5.97445
ENSG00000096006	CRISP3	6:49727383-49744437	0.394497	0.263181	0.481242	0.555732	1.08087	0.420236	0.386501
ENSG00000097096	SYDE2	1:85156872-85201046	14.5522	6.20731	7.28345	6.88045	6.20343	4.4939	3.45602
ENSG00000099194	SCD	10:100347123-100364834	77.5289	18.8978	12.679	7.27336	16.3297	14.7263	7.98052
ENSG00000099250	NRP1	10:33177491-33336262	9.98694	12.4445	15.7376	9.25673	13.0362	9.06078	10.8304
ENSG00000099812	MISP	19:751125-764318	17.7034	32.877	30.9438	28.3855	25.1351	28.3868	26.6348
ENSG00000099954	CECR2	22:17359948-17558149	2.00573	0.320699	0.465007	0.597888	0.585706	0.630038	0.654958
ENSG00000099994	SUSD2	22:24181258-24189110	213.934	103.213	145.618	193.968	164.942	156.852	120.664
ENSG00000099998	GGT5	22:24219653-24245142	6.48161	2.51411	4.62344	9.12172	7.56385	7.34344	6.4674
ENSG00000100029	PES1	22:30576624-30607083	28.0869	66.4286	59.9669	50.956	58.2395	57.8314	63.6502
ENSG00000100031	GGT1	22:24583749-24629005	33.4564	10.8708	13.5279	15.8853	24.4345	18.9557	20.4047
ENSG00000100033	PRODH	22:18912776-18936553	17.9783	4.58392	5.69258	7.8437	8.82166	7.18679	7.36157
ENSG00000100156	SLC16A8	22:38078133-38084093	1.02605	0.778711	0.859814	1.79026	1.55593	0.319422	0.958887
ENSG00000100216	TOMM22	22:38681947-38685421	25.3404	51.7209	41.7211	43.7244	40.5405	45.0235	48.0782
ENSG00000100234	TIMP3	22:32801700-32863043	20.0947	11.6711	16.1814	23.8189	22.934	18.0734	18.8965
ENSG00000100418	DESI1	22:41598027-41621096	7.07329	19.3838	16.2689	22.4577	14.7536	14.1297	22.8337
ENSG00000100462	PRMT5	14:22920510-22929585	36.065	82.5105	66.2764	58.4544	54.8672	57.5008	57.1089
ENSG00000100504	PYGL	14:50857890-50944736	84.1961	179.605	170.491	146.438	150.559	146.098	162.002
ENSG00000100664	EIF5	14:103333543-103345025	106.853	289.716	202.667	188.877	155.443	163.833	164.723
ENSG00000101004	NINL	20:25452704-25585517	4.07621	1.02735	1.82504	1.63189	1.78896	2.38002	1.90455
ENSG00000101096	NFATC2	20:51386956-51562831	3.07728	1.17774	1.40977	1.4875	1.38301	1.51137	1.40286
ENSG00000101115	SALL4	20:51782330-51802520	1.09423	0.67207	1.0754	1.99549	1.95959	0.901501	2.19306
ENSG00000101132	PFDN4	20:54207846-54228052	82.0449	163.513	139.109	138.798	140.038	137.972	165.107
ENSG00000101144	BMP7	20:57168747-57266629	69.7147	32.6137	34.317	38.1658	26.4448	42.5588	29.2689
ENSG00000101255	TRIB3	20:362834-397559	5.00032	6.81881	7.29854	9.05147	13.1036	9.0519	10.1729
ENSG00000101265	RASSF2	20:4780022-4823645	6.53868	3.72771	3.70459	4.01117	3.7737	4.22135	2.63947
ENSG00000101336	HCK	20:32052187-32101856	0.879259	0.609594	0.813951	1.11805	1.37362	0.668456	0.871738
ENSG00000101347	SAMHD1	20:36890228-36951843	12.5211	7.52397	7.03525	6.61341	5.47427	8.5581	5.7677
ENSG00000101361	NOP56	20:2652144-2658393	47.7836	136.856	128.637	105.021	113.514	111.432	136.017
ENSG00000101442	ACTR5	20:38748441-38772520	3.98017	4.23131	4.96283	3.29639	3.92623	4.79359	4.44672
ENSG00000101474	APMAP	20:24962924-24992979	48.5928	26.0328	37.4562	44.0671	42.9185	42.5243	38.1822
ENSG00000101670	LIPG	18:49560698-49599182	11.7784	7.98052	6.89903	10.4849	7.30978	6.49946	6.11355
ENSG00000101868	POLA1	X:24693918-24996986	5.77131	7.37259	7.00332	6.51701	5.08671	7.34778	5.60522
ENSG00000102109	PCSK1N	X:48831093-48835633	4.69473	4.59777	3.58783	3.77437	2.64594	4.79137	2.65521
ENSG00000102172	SMS	X:21940572-21994835	34.7888	73.2858	65.0907	74.9688	68.2715	77.7265	92.5861
ENSG00000102287	GABRE	X:151953123-151974680	7.12716	6.55288	6.97998	8.14889	10.3611	6.6533	10.6232
ENSG00000102409	BEX4	X:103215091-103217246	53.1769	24.924	25.2711	23.5778	33.7274	30.468	26.9075
ENSG00000102924	CBLN1	16:49277916-49281831	2.57693	2.06523	2.28957	1.06661	2.17873	1.72004	0.93112
ENSG00000102935	ZNF423	16:49487523-49857919	1.2892	0.338877	0.80572	2.38398	0.293631	0.360218	0.775301
ENSG00000102996	MMP15	16:58025565-58046901	9.76321	6.3593	7.70696	10.8104	7.57137	8.27004	7.12941
ENSG00000103047	TANGO6	16:68843603-69085180	1.46763	1.96348	1.87444	3.45408	1.65611	2.03049	1.7834
ENSG00000103187	COTL1	16:84565593-84618077	198.265	414.537	360.496	400.103	348.514	318.964	352.495
ENSG00000103316	CRYM	16:21238873-21303083	3.71993	0.31806	0.797606	0.74998	1.31551	0.869032	0.531062
ENSG00000103485	QPRT	16:29679007-29698699	78.7278	37.5787	39.353	42.696	45.7689	56.4787	35.971
ENSG00000104081	BMF	15:40087889-40108892	7.75343	1.48688	1.53965	2.61904	2.18935	3.18501	2.70629
ENSG00000104267	CA2	8:85463851-85481493	5.54183	10.1558	6.59958	7.38058	6.86226	7.66991	7.32361
ENSG00000104327	CALB1	8:90058607-90095475	0.147335	1.34793	0.675667	1.48272	1.13519	0.828946	1.13768
ENSG00000104356	POP1	8:98117296-98159834	3.5009	7.20413	6.61446	5.5934	5.14646	5.04001	4.78941
ENSG00000104365	IKBKB	8:42271301-42332653	4.74753	4.05178	2.3348	5.19725	4.27865	4.53507	4.52172
ENSG00000104381	GDAP1	8:74321129-74488872	6.54503	7.24915	8.49457	5.3719	6.3777	5.13861	6.42773
ENSG00000104419	NDRG1	8:133237170-133302022	8.22176	3.83896	6.00321	7.59378	16.7237	11.8296	30.9122
ENSG00000104490	NCALD	8:101686542-102124907	1.13157	0.0659506	0.231514	0.0565026	0.1108	0.154915	0.0392304
ENSG00000104497	SNX16	8:81799580-81842866	4.49593	5.428	5.26509	6.94872	6.68637	3.58194	5.52917
ENSG00000104833	TUBB4A	19:6494318-6502848	11.178	12.2489	11.9238	10.4107	7.23604	12.3574	7.94876
ENSG00000104856	RELB	19:45001429-45038198	3.02398	3.79007	5.37295	7.69631	5.4782	3.47527	6.911
ENSG00000104870	FCGRT	19:49506815-49526333	25.0344	7.3678	8.61525	13.6818	14.3258	15.3606	11.2832
ENSG00000104888	SLC17A7	19:49429400-49442360	8.76837	2.14115	2.89238	2.92832	3.05452	3.14308	2.33406
ENSG00000104907	TRMT1	19:13104901-13117567	10.7052	23.013	21.4969	24.7705	23.228	21.0053	28.3192
ENSG00000104967	NOVA2	19:45933733-45973546	2.07774	0.747045	0.867594	0.908192	0.948153	0.977366	0.833959
ENSG00000105048	TNNT1	19:55132793-55149354	82.6677	65.0443	63.8022	70.4964	63.8212	87.4077	70.0805
ENSG00000105185	PDCD5	19:32581067-32587452	46.5755	133.87	107.097	102.352	104.786	104.666	131.01
ENSG00000105197	TIMM50	19:39480411-39493785	37.8454	70.6535	60.3668	62.5777	56.05	60.3094	61.8315
ENSG00000105223	PLD3	19:40348455-40380439	267.7	112.264	137.019	166.697	170.548	157.555	147.932
ENSG00000105246	EBI3	19:4229497-4237531	2.72862	1.25846	2.50932	3.71259	3.29	2.6841	3.21709
ENSG00000105289	TJP3	19:3708108-3750813	16.694	7.16461	7.7353	7.91592	17.7128	15.1535	10.1784
ENSG00000105327	BBC3	19:47220821-47232766	1.3297	0.454779	1.17256	0.784202	1.88131	1.38765	1.35305
ENSG00000105397	TYK2	19:10350528-10380676	23.423	18.7137	18.2239	19.3551	35.2822	24.9571	35.7843
ENSG00000105404	RABAC1	19:41956680-41959390	54.2054	34.906	33.0739	61.1601	55.6721	57.1315	55.2304
ENSG00000105429	MEGF8	19:42325608-42378769	25.7968	9.07215	12.5813	14.1698	13.541	12.477	10.8745
ENSG00000105499	PLA2G4C	19:48047842-48110817	0.738766	0.605873	0.714216	2.53798	2.75795	0.621135	1.38841
ENSG00000105523	FAM83E	19:48600809-48614854	0.858945	0.477741	0.76983	0.559454	2.59015	1.21279	1.43025
ENSG00000105612	DNASE2	19:12875210-12881468	22.6606	9.34762	14.274	16.7317	19.899	19.4312	14.27
ENSG00000105707	HPN	19:35040505-35066571	23.036	5.78331	6.52918	7.09192	8.85341	9.0987	7.49391
ENSG00000105767	CADM4	19:43622367-43639839	46.8035	28.0569	40.9242	48.0755	44.6109	40.9368	35.7723
ENSG00000105825	TFPI2	7:93885396-93890991	26.9033	49.5715	67.0019	78.4578	72.8459	44.2188	68.9102
ENSG00000105928	DFNA5	7:24698352-24758113	6.77953	2.21079	2.6665	3.59875	4.72291	3.48197	2.41683
ENSG00000105974	CAV1	7:116524784-116561184	31.3084	105.856	110.945	116.742	110.38	80.7231	100.786
ENSG00000105976	MET	7:116672389-116798386	34.5836	28.0274	33.5243	40.3242	29.3296	22.1561	19.8139
ENSG00000106003	LFNG	7:2512528-2529177	29.9774	10.0734	16.307	15.9889	13.009	14.9601	9.45612
ENSG00000106128	GHRHR	7:30938668-30993254	1.50104	0.813954	0.0905583	1.22635	0.953543	1.78978	0.77205
ENSG00000106211	HSPB1	7:76302543-76304295	143.635	146.387	142.327	229.162	194.62	233.539	219.02
ENSG00000106366	SERPINE1	7:101127088-101139266	11.8607	12.9063	21.2776	46.0639	34.8255	18.8116	47.2132
ENSG00000106541	AGR2	7:16791810-16833433	21.0411	20.138	19.6718	13.5951	20.6887	22.4611	9.08857
ENSG00000106633	GCK	7:44144270-44198170	0.11408	0.479274	0.270165	0	0.520825	0.12104	0
ENSG00000106686	SPATA6L	9:4553385-4666674	0.881956	0.753468	0.454926	0.187906	1.05806	0.500627	0.67163
ENSG00000107105	ELAVL2	9:23690103-23826337	1.06632	1.28714	1.6236	1.13064	1.83418	0.939604	0.985958
ENSG00000107551	RASSF4	10:44959406-44995891	4.4046	1.25889	1.61498	2.20478	1.87824	2.55124	2.04151
ENSG00000107669	ATE1	10:121740420-121928801	8.6587	8.71882	5.00689	5.75435	5.00849	5.31167	4.56367
ENSG00000107731	UNC5B	10:71212569-71302864	27.0946	7.94514	10.8243	10.1324	9.40978	12.7966	9.28436
ENSG00000107789	MINPP1	10:87504874-87553460	14.0669	7.97923	11.7232	9.73011	9.73044	11.5219	8.41677
ENSG00000107833	NPM3	10:101781324-101783413	39.1747	49.9144	44.7495	47.15	38.4582	54.1845	50.9649
ENSG00000107864	CPEB3	10:92046691-92291087	0.829415	0.13977	0.272305	0.36162	0.40888	0.312829	0.395863
ENSG00000108010	GLRX3	10:130136398-130184521	40.9124	93.7818	72.1146	77.074	68.2323	79.1042	81.3889
ENSG00000108244	KRT23	17:40922695-40937634	6.88253	2.66354	3.3878	7.3419	4.9212	4.23859	4.75978
ENSG00000108370	RGS9	17:65137430-65227703	5.13944	1.07866	0.754115	0.50235	1.2899	2.27773	1.41072
ENSG00000108518	PFN1	17:4945651-4949061	338.08	608.67	430.698	459.623	305.947	420.437	360.786
ENSG00000108551	RASD1	17:17494436-17496395	1.50674	0.703994	1.35391	0.998983	1.22032	0.563008	1.07086
ENSG00000108602	ALDH3A1	17:19737983-19748943	2.35103	1.1791	1.50307	0.938152	1.98224	1.62392	1.54484
ENSG00000108797	CNTNAP1	17:42682612-42699814	2.85706	2.14909	3.03812	3.69716	3.31169	1.77629	2.21835
ENSG00000108829	LRRC59	17:50375058-50397553	58.7885	112.789	95.6887	96.2279	87.7593	91.9149	95.946
ENSG00000108830	RND2	17:43025240-43032036	2.40144	0.789755	0.748254	1.29077	1.42051	1.62741	1.02445
ENSG00000108947	EFNB3	17:7705201-7711378	12.1284	3.88216	4.62263	4.20218	5.08411	5.03951	3.68456
ENSG00000109063	MYH3	17:10628525-10657309	0.464774	0.273673	0.182801	0.207772	1.07494	0.379784	0.454711
ENSG00000109321	AREG	4:74445133-74455009	8.14776	14.9364	15.4455	15.8586	24.0809	12.4672	31.8129
ENSG00000109323	MANBA	4:102631487-102760994	11.2495	5.29875	7.81811	8.17617	7.32991	7.62142	7.52802
ENSG00000109339	MAPK10	4:86015122-86594131	3.04514	1.63295	2.01013	1.71439	3.07	2.79533	1.65727
ENSG00000109436	TBC1D9	4:140620764-140756120	3.47598	2.1733	1.54296	2.69107	2.30206	2.13046	1.96859
ENSG00000109452	INPP4B	4:142023159-142847432	11.7828	28.4689	24.694	28.5958	25.4072	18.8913	20.1315
ENSG00000109472	CPE	4:165361193-165498320	41.8555	13.0314	20.8263	20.2852	20.0461	19.3533	16.7364
ENSG00000109534	GAR1	4:109815509-109824740	22.881	46.556	39.3161	35.8207	37.3006	42.124	38.3166
ENSG00000109625	CPZ	4:8592659-8619759	8.46065	3.07104	4.87718	5.43432	5.57483	6.28745	5.46682
ENSG00000109654	TRIM2	4:153152341-153339320	3.5969	1.44177	2.00051	1.88711	1.96519	2.29172	1.56781
ENSG00000109794	FAM149A	4:186104418-186172667	1.32123	1.2212	1.48447	1.58592	0.610546	1.91609	1.75476
ENSG00000109971	HSPA8	11:123057488-123063230	481.448	983.218	694.61	762.823	502.258	677.355	551.208
ENSG00000110104	CCDC86	11:60842070-60851081	6.85768	26.8387	20.8098	17.1857	18.1496	17.3622	21.2934
ENSG00000110172	CHORDC1	11:90201159-90223364	37.7094	79.5059	58.7905	57.7506	49.3935	54.7649	57.0806
ENSG00000110195	FOLR1	11:72189557-72196301	163.321	31.0654	44.399	66.3123	79.8708	72.9663	60.3217
ENSG00000110628	SLC22A18	11:2899720-2925246	1.7378	0.561577	2.00398	2.63379	2.93206	1.303	2.32378
ENSG00000110799	VWF	12:5948873-6124770	0.208906	0.0822001	0.437252	0.435498	0.419537	0.156901	0.216232
ENSG00000110944	IL23A	12:56334173-56340410	0.958717	1.07325	1.40379	2.35117	2.41175	0.9218	3.17876
ENSG00000111196	MAGOHB	12:10604189-10613623	36.2255	80.4326	67.596	57.4938	60.1936	54.5556	64.9683
ENSG00000111199	TRPV4	12:109783084-109833401	6.32921	1.80656	1.59567	2.63408	2.55479	2.9689	2.07868
ENSG00000111331	OAS3	12:112938351-112973249	4.30865	3.16263	3.44707	4.25994	2.72018	3.1138	2.58772
ENSG00000111348	ARHGDIB	12:14942016-14961728	113.837	284.556	265.818	273.411	270.228	257.357	259.264
ENSG00000111554	MDM1	12:68272442-68332381	7.4762	5.06702	5.12807	7.9297	4.533	7.57462	5.45505
ENSG00000111641	NOP2	12:6556862-6568691	22.06	50.1067	44.4843	42.9213	46.2324	42.1704	54.3273
ENSG00000111653	ING4	12:6650279-6663148	16.0474	5.25418	4.91997	9.00036	7.43931	7.77989	6.77518
ENSG00000111700	SLCO1B3	12:20810701-20916911	0.614675	0.725302	0.354661	1.74139	1.17163	1.19185	1.29559
ENSG00000111801	BTN3A3	6:26440471-26453415	10.2558	3.81881	4.78842	4.24539	4.50022	5.01437	3.72631
ENSG00000111816	FRK	6:115931148-116060758	1.33708	0.746025	0.665999	1.03488	1.00387	0.789645	0.666981
ENSG00000111845	PAK1IP1	6:10694694-10709782	14.2026	36.2718	29.9116	26.95	26.4714	28.5384	28.2685
ENSG00000111859	NEDD9	6:11183297-11382348	5.01556	2.68404	3.2287	5.7758	6.18471	3.61332	3.93038
ENSG00000111863	ADTRP	6:11712053-11807046	1.19019	1.72564	1.57735	3.19745	3.20309	2.36448	2.89415
ENSG00000111897	SERINC1	6:122443353-122471822	49.9213	31.998	45.2438	46.1327	55.7464	39.667	46.0562
ENSG00000111962	UST	6:148747327-149076990	0.0204974	0	0.016147	0.222192	0.0100652	0.0327668	0.813099
ENSG00000112182	BACH2	6:89926528-90296908	0.522665	0.421722	0.483816	0.882073	0.779689	0.17467	0.231176
ENSG00000112245	PTP4A1	6:63521760-63583587	28.7506	64.8065	67.089	95.5313	62.4743	48.3954	50.7927
ENSG00000112320	SOBP	6:107489957-107660167	2.08567	1.47276	1.13279	1.88489	0.91632	1.35901	0.968825
ENSG00000112530	PACRG	6:162727131-163315492	0	0.113126	0	0.704304	0	0	0
ENSG00000112562	SMOC2	6:168441150-168673445	9.22188	2.83234	3.4232	3.92816	3.93936	4.20472	2.70008
ENSG00000112578	BYSL	6:41921187-41933046	8.20796	23.4173	19.7937	17.7974	18.4031	17.5755	22.3415
ENSG00000112655	PTK7	6:43076267-43161719	96.5752	43.6951	65.0341	71.5902	69.613	84.9363	80.7796
ENSG00000112715	VEGFA	6:43770183-43786487	25.4149	25.6036	26.0786	34.2636	33.4898	27.2437	44.04
ENSG00000112769	LAMA4	6:112108759-112254939	1.37161	3.27941	2.87863	5.10408	4.62688	2.53722	4.7889
ENSG00000112782	CLIC5	6:45898450-46080395	0.372547	0.0624366	0.0418421	0.917749	0.657767	0.232809	0.223173
ENSG00000112796	ENPP5	6:46159186-46170971	17.5086	5.14415	7.65734	9.86303	8.32238	7.71876	6.45305
ENSG00000112972	HMGCS1	5:43289394-43313512	40.0589	33.0284	31.584	31.8557	38.072	25.7271	26.3981
ENSG00000113070	HBEGF	5:140332842-140346631	2.22741	2.25893	3.05117	3.5378	4.69577	2.57235	4.3202
ENSG00000113073	SLC4A9	5:140360201-140375143	0.354486	0.102506	0.0738129	0.494196	0.10237	0.175655	0.217568
ENSG00000113140	SPARC	5:151661095-151687165	54.5392	21.6913	37.0508	48.2452	45.3556	48.4124	45.0638
ENSG00000113296	THBS4	5:79991310-80083287	0.620858	0.148476	0.751323	0.627355	0.489828	0.150763	0.322428
ENSG00000113369	ARRDC3	5:91368723-91383359	3.76997	8.07337	8.51681	8.73234	9.45336	5.23365	8.68983
ENSG00000113430	IRX4	5:1877412-1887236	6.69718	8.3444	7.90759	9.49903	10.5451	5.7026	11.4414
ENSG00000113532	ST8SIA4	5:100806934-100903266	1.09533	0.1149	0.377773	0.145711	0.526923	0.292331	0.0922065
ENSG00000113594	LIFR	5:38474962-38608354	19.8756	21.916	19.3979	18.0676	18.6085	11.963	10.0655
ENSG00000113645	WWC1	5:168291650-168472303	37.6004	69.1298	76.6662	66.6169	59.8988	55.8363	60.2793
ENSG00000113721	PDGFRB	5:150113836-150155872	1.09287	1.16179	0.588253	1.20685	1.46829	0.601895	0.71157
ENSG00000114251	WNT5A	3:55465714-55489945	14.8743	2.44792	4.06349	4.19199	3.30184	3.91325	2.2635
ENSG00000114251	WNT5A	3:55489154-55490539	0.136878	0	0	0	0	0	0
ENSG00000114270	COL7A1	3:48564072-48595267	13.9053	10.1199	13.8347	19.4167	17.3739	17.2825	38.444
ENSG00000114315	HES1	3:194136144-194138732	75.6728	24.8316	35.0561	25.4931	34.1039	23.5501	39.9654
ENSG00000114541	FRMD4B	3:69169989-69542583	2.35641	1.02583	0.982291	1.81362	1.1096	1.87884	1.30713
ENSG00000114544	SLC41A3	3:126006354-126101561	34.5161	14.2037	15.8797	19.1259	21.5317	20.0643	16.6516
ENSG00000114547	ROPN1B	3:125969143-125983454	3.13418	0.784718	0.855785	0.833313	1.1065	0.710101	0.743497
ENSG00000114626	ABTB1	3:127672934-127680920	3.73213	0.936056	1.23069	1.55734	2.18334	2.05119	2.0756
ENSG00000114686	MRPL3	3:131462211-131502983	41.9317	94.6569	76.593	71.4022	64.282	70.3088	68.9283
ENSG00000114767	RRP9	3:51933429-51941941	10.1663	22.3351	19.1534	19.5115	15.6932	18.9999	22.8771
ENSG00000114796	KLHL24	3:183635567-183684477	4.70841	1.20976	1.08723	3.42434	2.63984	1.57778	2.01453
ENSG00000114854	TNNC1	3:52451101-52454070	119.724	58.2593	60.0571	81.1626	83.3194	87.9788	54.2482
ENSG00000114923	SLC4A3	2:219627326-219641980	3.1782	2.55332	2.14588	2.5214	3.28797	1.9634	3.32733
ENSG00000115221	ITGB6	2:160099665-160271888	8.27493	9.68136	13.914	20.4776	16.3983	13.0345	15.42
ENSG00000115232	ITGA4	2:181457201-181536187	9.96281	12.7593	16.9183	13.9582	8.76156	7.85672	6.60149
ENSG00000115414	FN1	2:215360439-215436172	8.68973	2.96016	3.21208	4.75676	6.10754	4.69042	6.25896
ENSG00000115457	IGFBP2	2:216632827-216664436	8.43031	3.46875	6.2235	4.71015	5.05865	4.90437	4.27717
ENSG00000115548	KDM3A	2:86440646-86492716	7.53513	6.74384	7.22875	6.40872	7.82094	6.51476	11.2208
ENSG00000115556	PLCD4	2:218607764-218637184	0.802701	0.606641	0.619455	0.189842	0.784831	0.768133	0.389169
ENSG00000115590	IL1R2	2:101991843-102028544	0.13802	1.01591	1.07211	2.65426	1.77908	1.34	4.14028
ENSG00000115596	WNT6	2:218859820-218874233	3.68809	0.627688	0.942607	0.941827	1.01475	1.47651	0.898467
ENSG00000115598	IL1RL2	2:102186972-102240002	0.890065	1.51559	1.48399	0.72037	2.01366	0.869146	1.79559
ENSG00000115641	FHL2	2:105357711-105438513	16.5507	48.8058	39.3981	36.288	41.9556	30.7624	42.8592
ENSG00000115758	ODC1	2:10439967-10448504	11.6559	30.5731	26.7973	25.4385	23.3643	21.4968	26.2023
ENSG00000115828	QPCT	2:37344573-37373322	19.7735	5.81507	9.03376	13.5973	13.5129	11.5923	12.4629
ENSG00000115902	SLC1A4	2:64988476-65023865	5.20471	2.08388	3.75247	4.98245	4.3853	3.57747	2.76058
ENSG00000115963	RND3	2:150468194-150539011	15.4511	18.3382	24.3289	24.9547	29.7512	18.8285	23.4818
ENSG00000116005	PCYOX1	2:70257385-70281191	36.2177	16.726	20.9163	23.886	21.0028	21.4393	17.1098
ENSG00000116120	FARSB	2:222570535-222656337	17.0338	36.8752	32.4383	32.5897	28.3308	30.0777	28.7324
ENSG00000116649	SRM	1:11054583-11060024	20.6597	116.453	85.7037	79.3491	67.3679	81.4167	98.1385
ENSG00000116675	DNAJC6	1:65248218-65415869	7.67132	8.21207	7.66625	8.50055	7.34532	4.13421	5.17389
ENSG00000116717	GADD45A	1:67685060-67688338	35.8844	45.9116	49.7226	53.5142	68.3611	34.7891	59.8658
ENSG00000116741	RGS2	1:192809038-192812283	6.96507	7.52736	5.95565	5.17972	8.1978	5.08177	6.7689
ENSG00000116761	CTH	1:70411217-70439851	6.948	7.29618	7.36704	8.51587	12.6208	7.85331	7.64931
ENSG00000116774	OLFML3	1:113979390-114035572	39.7713	17.4583	21.34	23.9652	23.8595	18.6557	25.0581
ENSG00000116991	SIPA1L2	1:232397964-232561558	4.0791	5.7164	6.123	7.06761	5.50833	3.45742	4.11011
ENSG00000117148	ACTL8	1:17755312-17827063	36.1896	148.69	129.642	106.395	88.4898	126.131	130.025
ENSG00000117226	GBP3	1:89006665-89022894	14.1564	30.5813	25.8026	22.9534	22.5509	15.0243	21.1021
ENSG00000117228	GBP1	1:89052318-89065360	3.74743	4.98641	7.04076	3.82195	7.59717	5.09135	5.92667
ENSG00000117318	ID3	1:23557917-23559794	7.12348	13.4627	12.1957	11.1288	9.96855	9.97053	17.8539
ENSG00000117395	EBNA1BP2	1:43164174-43270936	52.309	147.057	129.826	111.245	104.651	113.184	135.701
ENSG00000117525	F3	1:94529224-94541800	29.1652	74.8133	106.495	93.8184	88.2336	69.1697	98.8532
ENSG00000117597	DIEXF	1:209828006-209857565	2.50198	4.79559	4.49155	4.04623	4.52503	3.83091	4.32194
ENSG00000118307	CASC1	12:25108419-25195162	2.44029	0.464878	1.01321	0.919463	1.05352	0.645482	0.402763
ENSG00000118503	TNFAIP3	6:137867187-137883312	2.8748	3.61116	4.07112	3.63657	3.93773	2.23046	5.78469
ENSG00000118523	CTGF	6:131948175-131951373	73.6991	9.55483	28.122	14.3041	25.2876	10.6165	20.8631
ENSG00000118971	CCND2	12:4273771-4305350	1.34488	0.294571	0.478257	0.59591	0.884776	0.661083	0.591745
ENSG00000119125	GDA	9:72114594-72257193	4.25141	5.14546	3.8937	7.17171	5.38864	5.435	5.73109
ENSG00000119227	PIGZ	3:196946342-196969060	5.78549	1.72719	2.1546	2.0459	3.10649	2.64305	2.35399
ENSG00000119326	CTNNAL1	9:108942568-109013529	62.9281	132.086	119.439	111.005	99.3664	90.9537	90.4515
ENSG00000119514	GALNT12	9:98807698-98850081	4.26584	1.16534	1.97297	2.02462	2.02979	1.99469	2.06317
ENSG00000119681	LTBP2	14:74498169-74612378	3.45321	2.08515	3.33295	2.68309	2.50229	2.6913	4.64789
ENSG00000119715	ESRRB	14:76310613-76501841	1.8207	0.12254	0.160206	0.286641	0.27974	0.146053	0.2572
ENSG00000119915	ELOVL3	10:102226327-102229589	4.25155	2.04828	2.19728	2.4701	4.69014	3.71002	3.26918
ENSG00000119986	AVPI1	10:97677423-97687323	9.64575	19.4635	15.0503	15.0898	19.0148	17.6353	19.5272
ENSG00000120129	DUSP1	5:172768089-172771195	26.774	13.6834	27.5266	17.2731	22.8979	10.1049	20.7081
ENSG00000120694	HSPH1	13:31134973-31162388	35.4003	66.0187	58.6149	58.1547	48.1486	60.505	58.4874
ENSG00000120738	EGR1	5:138465489-138469315	194.042	37.7498	62.4897	34.3136	49.6907	34.1733	49.9193
ENSG00000120800	UTP20	12:101280108-101386616	1.79384	3.57923	3.51753	3.01304	2.53722	2.51283	2.16564
ENSG00000120820	GLT8D2	12:103988983-104064183	0.772343	0.258777	0.42021	0.470739	0.689169	0.721378	0.189588
ENSG00000120875	DUSP4	8:29333063-29350668	1.25195	9.65147	6.16889	6.38016	6.61628	5.25269	8.88859
ENSG00000121064	SCPEP1	17:56978104-57006768	39.2338	13.0267	17.1936	20.9132	21.2895	23.6559	20.7461
ENSG00000121075	TBX4	17:61452403-61485110	0.760141	0.0537576	0.153668	0.161272	0.329009	0.372914	0.253855
ENSG00000121769	FABP3	1:31365624-31376850	30.4011	70.7838	62.7425	87.244	87.3415	92.4551	96.8431
ENSG00000121797	CCRL2	3:46407162-46412997	0.435355	0.523149	0.52466	1.21596	0.905814	1.03441	0.719268
ENSG00000121858	TNFSF10	3:172505507-172523507	1.84256	0.343775	0.630122	0.70205	0.378005	1.24507	0.799863
ENSG00000121895	TMEM156	4:38966743-39032922	0.108615	0.978773	0.751925	2.26801	2.05828	0.726533	1.47523
ENSG00000122034	GTF3A	13:27424543-27435823	39.3115	83.9662	62.8271	55.5243	52.8565	61.6621	61.3722
ENSG00000122641	INHBA	7:41685113-41703108	0.494232	0.957631	3.44389	7.60802	6.31479	1.91351	5.93262
ENSG00000122861	PLAU	10:73909176-73917497	6.73205	3.68423	6.75575	12.5769	9.96821	7.75505	10.713
ENSG00000122863	CHST3	10:71964364-72013564	3.97913	4.98242	6.6503	7.61549	6.84592	4.09938	5.14086
ENSG00000122877	EGR2	10:62811995-62919900	8.77544	0.45015	0.617631	0.395835	0.508509	0.571856	0.693958
ENSG00000123064	DDX54	12:113157173-113185479	13.4485	32.2318	28.7973	29.9968	24.048	32.623	21.0803
ENSG00000123144	C19orf43	19:12730639-12734775	65.4625	96.3131	79.5528	83.9212	52.8949	90.0501	60.0689
ENSG00000123358	NR4A1	12:52022831-52059507	62.9821	9.42229	16.9384	8.82806	14.0853	10.8897	19.5074
ENSG00000123384	LRP1	12:57128492-57213351	14.6807	3.89952	5.97861	6.1088	6.8728	8.39711	8.01864
ENSG00000123843	C4BPB	1:207088841-207099993	1.79415	4.55019	7.66288	9.4223	10.6395	4.83324	5.32036
ENSG00000123933	MXD4	4:2247431-2262294	12.8973	3.01574	3.69207	4.20389	4.12085	5.28651	3.70595
ENSG00000123977	DAW1	2:227871053-227924344	0.315037	1.681	1.69413	3.17674	2.35917	1.48336	2.16248
ENSG00000124098	FAM210B	20:56358914-56368663	25.8308	9.38215	9.73361	10.7756	12.9112	13.3496	12.4748
ENSG00000124102	PI3	20:45174875-45176544	9.94624	58.9692	54.9536	41.3636	52.9959	23.6098	55.48
ENSG00000124107	SLPI	20:45252238-45254564	100.478	98.1379	122.407	132.536	188.149	122.025	181.831
ENSG00000124143	ARHGAP40	20:38601933-38651035	1.88942	1.39532	1.12356	1.99595	2.51797	1.62244	2.61037
ENSG00000124145	SDC4	20:45325287-45348424	164.716	134.478	186.503	197.703	191.634	154.565	186.277
ENSG00000124216	SNAI1	20:49982998-49988886	9.10086	6.89664	6.06676	5.67207	10.0471	6.35388	9.4094
ENSG00000124224	PPP4R1L	20:58228939-58309439	3.68826	2.72523	3.73203	2.80783	5.03577	3.511	3.76851
ENSG00000124302	CHST8	19:33621954-33773509	11.5399	11.2813	11.3077	13.7992	9.55743	8.82262	7.58608
ENSG00000124467	PSG8	19:42752685-42855691	1.30592	0.424686	0.847863	2.86848	2.2165	0.613058	0.759269
ENSG00000124762	CDKN1A	6:36676459-36687339	46.7635	17.4363	19.1174	24.2917	35.7355	23.68	29.1692
ENSG00000124772	CPNE5	6:36740774-36840002	0.889643	0.166456	0.595303	0.588983	0.583296	0.575726	0.362126
ENSG00000124787	RPP40	6:4994731-5004063	13.0487	31.4202	24.3395	20.1419	23.3231	19.4857	22.0243
ENSG00000124882	EREG	4:74365142-74388751	0.862461	2.59826	2.58638	4.19088	4.77845	1.59127	3.77588
ENSG00000125122	LRRC29	16:67207138-67227048	1.13179	0.602304	0.290522	1.26683	0.734003	0.672541	1.12171
ENSG00000125148	MT2A	16:56608198-56609497	126.309	376.867	350.21	293.809	236.534	242.46	362.519
ENSG00000125257	ABCC4	13:95019828-95301446	6.39247	6.77503	7.30538	8.40483	5.39009	5.11134	4.32271
ENSG00000125266	EFNB2	13:106489730-106535114	24.187	43.8783	38.2884	27.1092	25.6145	23.7685	25.2166
ENSG00000125378	BMP4	14:53949735-53958761	55.6304	23.1722	38.0637	35.9393	27.2299	27.701	12.164
ENSG00000125398	SOX9	17:72121019-72126420	3.37846	6.74508	7.85473	7.44116	7.39012	4.10889	7.66104
ENSG00000125510	OPRL1	20:64080172-64100643	4.50252	1.19189	1.36308	1.99057	2.29512	2.08768	1.62977
ENSG00000125730	C3	19:6677703-6730562	21.5924	11.669	20.9667	34.3832	28.8616	33.153	40.7169
ENSG00000125740	FOSB	19:45467994-45475179	29.4261	3.07331	7.8196	1.99909	5.15668	1.53338	5.84636
ENSG00000125848	FLRT3	20:14322987-14337616	8.9323	2.10979	2.50049	2.40733	2.67639	2.83001	1.47127
ENSG00000125864	BFSP1	20:17493904-17569220	0.993475	1.38819	1.05527	1.56172	1.53899	0.586224	0.775728
ENSG00000125901	MRPS26	20:3045944-3048254	20.2633	27.2676	25.2595	23.2001	19.4332	31.2	23.6139
ENSG00000126067	PSMB2	1:35599543-35641844	62.1952	126.919	114.364	109.854	102.211	108.612	105.119
ENSG00000126524	SBDS	7:66987676-66995601	60.8198	135.788	117.425	106.173	120.65	105.513	118.415
ENSG00000126561	STAT5A	17:42287546-42311943	3.80041	3.71358	3.52993	4.38295	4.40971	2.70182	3.6003
ENSG00000126583	PRKCG	19:53879189-53907652	2.93494	1.12171	1.2649	2.43591	1.38499	1.23484	1.29082
ENSG00000126709	IFI6	1:27666060-27672218	98.4656	25.9081	38.7805	36.4672	31.6022	47.8308	24.2198
ENSG00000127129	EDN2	1:41478774-41484673	1.76277	1.26297	2.56276	2.97457	2.01507	2.46239	1.37802
ENSG00000127507	ADGRE2	19:14732392-14778541	2.22433	2.44409	2.41986	2.55585	3.66988	2.1736	4.31571
ENSG00000127528	KLF2	19:16324816-16327874	1.91341	1.9809	1.45379	2.80786	0.640698	1.05439	1.52468
ENSG00000128016	ZFP36	19:39406812-39409412	29.133	10.8216	14.9006	11.776	15.7092	9.47215	17.2311
ENSG00000128050	PAICS	4:56435740-56464579	51.4279	119.404	101.289	88.4959	87.0204	88.5848	81.9852
ENSG00000128228	SDF2L1	22:21642260-21644298	86.875	122.299	103.449	109.013	62.9925	117.63	83.6706
ENSG00000128242	GAL3ST1	22:30554634-30574587	0.523575	0.11977	0.0887548	0.222595	0.292749	0.0606246	0.199486
ENSG00000128268	MGAT3	22:39457343-39492194	2.90292	1.58795	1.49412	2.94034	2.42783	2.70486	2.45833
ENSG00000128342	LIF	22:30240446-30246851	3.92267	8.98243	13.5358	10.1205	11.7201	6.73353	13.6811
ENSG00000128422	KRT17	17:41619436-41624842	8.53614	9.9434	14.1998	55.1011	23.203	14.3758	27.4802
ENSG00000128510	CPA4	7:130293133-130324180	63.042	167.696	202.347	204.456	164.884	145.739	171.122
ENSG00000128573	FOXP2	7:114086326-114693772	1.93435	0.456919	1.22417	1.33489	1.47025	0.615876	0.608087
ENSG00000128641	MYO1B	2:191245184-191425389	16.5183	42.5346	32.5464	30.6553	28.6534	23.4568	28.9059
ENSG00000128655	PDE11A	2:177623251-178108339	0.723281	0.663495	0.258655	0.283752	0.489708	0.215827	0.583908
ENSG00000128872	TMOD2	15:51751560-51816368	1.97337	1.90001	1.62568	2.1694	1.73726	3.35746	1.5015
ENSG00000128918	ALDH1A2	15:57953423-58497866	0.320626	0.827806	1.02366	0.658921	2.24412	2.61551	2.10855
ENSG00000129003	VPS13C	15:61852388-62060473	10.4792	4.72948	7.02481	9.94821	9.20018	9.02285	9.56912
ENSG00000129158	SERGEF	11:17788047-18013162	15.623	9.70078	10.3037	9.57502	9.83449	12.0984	7.01137
ENSG00000129214	SHBG	17:7613945-7633383	0.364824	0.57474	0.113328	0.584353	0.0541475	0.156809	0.354599
ENSG00000129244	ATP1B2	17:7646626-7657768	17.7669	5.06123	5.34419	4.52451	5.09832	5.45247	5.04251
ENSG00000129295	LRRC6	8:132571952-132675617	1.13925	0.55284	1.00346	0.252745	0.650366	1.65175	0.678794
ENSG00000129451	KLK10	19:51012738-51020175	2.75008	3.04468	3.50525	4.32328	5.33235	3.05402	3.88242
ENSG00000129990	SYT5	19:55171198-55180441	0.0359423	0.132895	0.464838	0.00942521	0.747343	0.152991	0.335547
ENSG00000129993	CBFA2T3	16:88874857-88977204	0.450504	0.056082	0.355182	0.352056	0.274762	0.240707	0.346307
ENSG00000130066	SAT1	X:23783172-23786226	64.5858	32.7908	48.3402	56.8841	86.8878	59.4692	120.207
ENSG00000130164	LDLR	19:11089361-11133816	13.1933	11.8525	11.9019	12.1733	14.5488	8.08891	10.406
ENSG00000130203	APOE	19:44905753-44909393	304.54	125.548	160.244	196.701	190.497	204.711	177.914
ENSG00000130433	CACNG6	19:53992287-54012669	5.43781	3.56105	3.67595	6.56858	6.47583	4.38614	4.09095
ENSG00000130487	KLHDC7B	22:50548032-50551023	1.43767	0.985257	1.50248	2.56331	2.6223	1.92266	1.95526
ENSG00000130513	GDF15	19:18374730-18389176	27.6938	6.8894	13.5542	19.0948	37.546	15.9838	24.912
ENSG00000130595	TNNT3	11:1919561-1938706	10.2378	3.25014	3.36967	7.98381	5.36784	7.38989	7.34084
ENSG00000130600	H19	11:1995162-2001470	0.346363	0.157611	0.220504	0.120975	0.272546	1.71603	1.69926
ENSG00000130635	COL5A1	9:134641773-134844843	37.487	24.2719	33.6713	33.9904	27.9573	25.9981	25.6592
ENSG00000130684	ZNF337	20:25674214-25696841	4.19037	2.62443	2.99148	4.00688	3.5859	3.25934	5.72029
ENSG00000130701	RBBP8NL	20:62410236-62427533	4.87831	3.11465	2.51249	3.20597	2.23283	3.63335	2.69331
ENSG00000130707	ASS1	9:130444928-130501274	137.738	86.9171	87.5029	80.4177	98.6555	130.285	82.3769
ENSG00000130731	C16orf13	16:634426-636366	40.6564	70.2112	58.9182	54.8263	36.3027	62.2463	43.7786
ENSG00000130748	TMEM160	19:47045906-47048630	26.6482	28.8083	16.889	24.1226	9.2754	17.9119	8.75037
ENSG00000130826	DKC1	X:154762741-154777689	36.432	97.6169	85.8561	69.9889	70.0228	74.5719	84.5541
ENSG00000130830	MPP1	X:154778683-154821007	15.5153	8.33707	8.3544	6.6675	8.20222	12.2615	9.32597
ENSG00000131015	ULBP2	6:149941999-149949235	4.42464	4.49139	6.47685	8.05961	8.47453	7.19291	6.52127
ENSG00000131016	AKAP12	6:151239998-151358557	23.3351	26.1834	34.1016	21.6825	18.6508	28.5786	18.4598
ENSG00000131089	ARHGEF9	X:63634966-63809274	4.09806	3.73745	2.87169	2.14966	4.45329	3.48719	3.38078
ENSG00000131094	C1QL1	17:44959692-44968071	23.7672	7.97648	6.95882	10.7975	7.53902	9.319	7.22748
ENSG00000131711	MAP1B	5:72107233-72209570	2.14087	3.34023	4.09894	4.97509	4.90319	2.88745	3.50013
ENSG00000131746	TNS4	17:40475827-40501597	13.32	27.1048	25.418	19.1798	23.6768	23.2743	27.1798
ENSG00000131771	PPP1R1B	17:39626739-39636626	0.218405	0.325297	0.1105	0.176685	0.428459	0.0795963	0.398558
ENSG00000132122	SPATA6	1:48295371-48472208	6.88927	5.05555	3.77295	3.9822	3.53139	5.06733	2.52344
ENSG00000132170	PPARG	3:12287367-12434356	33.669	68.2084	52.115	57.1267	51.9758	47.2251	55.9911
ENSG00000132207	SLX1A	16:30193886-30197561	16.6087	22.2881	24.7082	21.9999	20.7219	24.6103	22.9321
ENSG00000132382	MYBBP1A	17:4538896-4555631	10.9446	26.3883	23.4001	23.7046	23.6939	21.7508	30.0275
ENSG00000132386	SERPINF1	17:1761958-1777574	12.0587	2.50888	3.05768	3.44615	4.08139	4.5698	4.45969
ENSG00000132424	PNISR	6:99398050-99425331	29.6228	19.0729	27.3121	26.5486	32.0265	28.8211	40.9801
ENSG00000132434	LANCL2	7:55365447-55433742	7.83784	15.9507	17.2014	11.9162	10.6923	13.32	10.8796
ENSG00000132465	JCHAIN	4:70655540-70681817	0.0338342	0	0.411824	0.0532837	0.227933	0.0720473	0
ENSG00000132507	EIF5A	17:7306998-7312463	183.714	479.858	401.746	344.12	328.359	384.646	392.738
ENSG00000132510	KDM6B	17:7839903-7854796	3.24572	1.93799	1.98144	2.60356	2.73823	1.72928	5.899
ENSG00000132517	SLC52A1	17:5032599-5052009	2.81615	0.676553	1.11064	1.73715	1.83838	1.36118	1.52466
ENSG00000132563	REEP2	5:138439016-138446969	10.7154	3.92615	4.34244	4.67265	5.04949	5.1089	4.50744
ENSG00000132768	DPH2	1:43969999-43973369	10.3752	23.547	18.5542	19.9947	17.5944	16.3523	19.1679
ENSG00000132854	KANK4	1:62236978-62319414	1.57883	0.791277	0.700943	0.91263	0.297466	1.10349	0.389147
ENSG00000132932	ATP8A2	13:25372070-26025851	3.77426	0.840557	0.687208	1.02627	1.1829	0.942263	2.04276
ENSG00000132963	POMP	13:28659103-28678925	60.4443	121.489	114.534	108.112	104.62	118.738	124.549
ENSG00000133101	CCNA1	13:36431519-36442882	0.906064	1.6288	1.89831	0.815556	1.77729	1.78215	1.95174
ENSG00000133119	RFC3	13:33818048-33966558	16.5647	31.6801	29.0546	24.8368	26.8256	23.3314	26.683
ENSG00000133135	RNF128	X:106693793-106796993	3.82284	1.23684	1.74977	1.75397	2.14885	2.42544	2.59247
ENSG00000133250	ZNF414	19:8509677-8514164	13.0072	14.2078	9.7493	10.1428	5.12731	9.72236	6.24504
ENSG00000133256	PDE6B	4:625583-670782	1.22724	0.424474	0.842083	0.728058	0.694588	0.794282	0.279153
ENSG00000133265	HSPBP1	19:55262230-55280381	27.9316	56.6046	50.6185	47.8409	33.7986	46.695	42.5517
ENSG00000133316	WDR74	11:62832341-62841809	7.56296	17.1422	15.2252	13.796	17.4022	16.8832	18.4408
ENSG00000133619	KRBA1	7:149714780-149734575	4.67931	3.40369	4.16129	4.4903	4.59005	2.2109	5.85976
ENSG00000133624	ZNF767P	7:149547153-149624752	2.41673	1.78417	4.1193	5.41408	3.53614	2.52951	3.59128
ENSG00000133863	TEX15	8:30831543-30890606	2.33461	1.97718	2.12997	2.22516	1.71823	1.62905	0.771324
ENSG00000134013	LOXL2	8:23297188-23425328	21.392	20.2107	27.766	39.5263	28.3067	23.1738	38.6318
ENSG00000134107	BHLHE40	3:4979115-4985323	37.6534	34.9516	42.098	40.1403	47.2562	28.8488	48.402
ENSG00000134138	MEIS2	15:36889203-37101299	49.2337	17.8321	20.3256	16.3718	12.4433	19.0799	11.5548
ENSG00000134215	VAV3	1:107571159-107965144	11.4964	2.33098	1.94652	1.87387	2.42055	3.259	1.88516
ENSG00000134243	SORT1	1:109309567-109397951	20.6657	7.20478	9.50524	11.5757	11.8818	9.57826	6.41351
ENSG00000134258	VTCN1	1:117143586-117210960	9.77864	2.47633	3.95918	4.93115	4.82579	5.53316	4.58693
ENSG00000134294	SLC38A2	12:46358188-46372867	35.0605	23.6017	33.6253	36.7366	39.3463	30.5205	34.7909
ENSG00000134333	LDHA	11:18394387-18408425	333.261	810.631	630.19	531.312	465.691	531.606	580.542
ENSG00000134375	TIMM17A	1:201955490-201970661	32.562	63.0909	53.5642	51.6924	50.2661	50.3755	52.0649
ENSG00000134668	SPOCD1	1:31790421-31816051	2.42721	5.70139	5.18916	5.6926	5.51995	4.97241	9.03063
ENSG00000134901	KDELC1	13:102784280-102799007	8.49029	2.86136	4.54339	4.67466	3.43374	4.37647	3.38359
ENSG00000134955	SLC37A2	11:125063066-125090312	7.37955	9.16689	8.99156	16.0915	11.6243	8.73016	14.6955
ENSG00000135046	ANXA1	9:73151756-73170393	55.0777	132.175	137.182	122.6	147.345	113.524	154.14
ENSG00000135048	TMEM2	9:71683365-71816690	19.9984	12.1888	21.3723	24.2863	22.0394	17.038	16.0908
ENSG00000135114	OASL	12:121019110-121039242	0.680155	0.176829	0.442732	0.299783	0.901741	1.11101	0.711648
ENSG00000135116	HRK	12:116856143-116881441	0.137569	0.471505	0.204665	0.765917	0.158834	0.245085	0.537911
ENSG00000135218	CD36	7:80369574-80679277	0.247539	0.226085	0.0858518	0.492792	0.48603	0.0835604	0.0865001
ENSG00000135318	NT5E	6:85449583-85495791	34.2026	37.7472	45.373	74.977	47.5103	39.9056	42.4202
ENSG00000135362	PRR5L	11:36296287-36465204	0.463526	0.0657254	0.519825	0.585239	0.572966	0.336435	0.573202
ENSG00000135437	RDH5	12:55720366-55724705	0.365085	0.322944	0.196249	0.0815093	0.747453	0.440727	0.324548
ENSG00000135447	PPP1R1A	12:54575386-54588659	2.5986	0.887948	1.24004	1.2219	1.33293	1.70223	0.402001
ENSG00000135549	PKIB	6:122471916-122726373	2.55744	0.962531	1.6743	1.99628	1.27684	0.939873	1.6543
ENSG00000135624	CCT7	2:73233419-73253021	134.548	265.618	238.085	235.637	205.582	235.409	230.108
ENSG00000135625	EGR4	2:73290928-73293705	3.50379	0.612752	0.638154	0.296398	0.832534	0.62204	0.883659
ENSG00000135643	KCNMB4	12:70366275-70434292	1.85429	0.493546	0.641256	1.48859	1.84953	1.41736	1.65508
ENSG00000135677	GNS	12:64713444-64759447	69.2654	26.6463	36.8703	44.8513	41.4703	37.6783	31.1969
ENSG00000135763	URB2	1:229626233-229660199	3.74861	8.35446	8.09795	6.03177	6.04171	5.74628	5.41557
ENSG00000135842	FAM129A	1:184790723-184974550	14.2151	9.18833	12.6778	14.7409	15.9841	11.9592	10.3083
ENSG00000135916	ITM2C	2:230864638-230879248	82.7838	36.938	41.3655	51.0761	50.9608	57.7844	47.3391
ENSG00000135925	WNT10A	2:218880362-218899581	9.28117	3.29152	4.32892	4.2287	2.92443	4.62216	4.26806
ENSG00000135960	EDAR	2:108894470-108989372	1.84763	0.214227	0.305567	0.160665	0.250629	0.435151	0.228575
ENSG00000135976	ANKRD36	2:97113495-97264521	2.48156	2.17496	2.08533	1.68902	2.92813	2.70321	3.50555
ENSG00000136111	TBC1D4	13:75284664-75482114	5.14692	5.2605	4.74525	7.06928	5.43709	4.82124	3.84815
ENSG00000136114	THSD1	13:52377166-52406494	1.42444	1.53139	2.91096	2.68751	3.95344	2.14657	3.30411
ENSG00000136155	SCEL	13:77535673-77645263	2.46153	2.72676	3.42146	4.93839	8.81239	3.57061	4.39316
ENSG00000136205	TNS3	7:47275153-47582558	133.128	59.9512	64.7505	67.4423	52.5213	57.7623	38.2418
ENSG00000136235	GPNMB	7:23235966-23275108	19.0971	5.17349	12.3443	19.6512	21.5367	15.8123	18.1062
ENSG00000136244	IL6	7:22725883-22732002	2.19293	8.43345	12.8186	11.9108	15.538	5.97212	11.0699
ENSG00000136261	BZW2	7:16646130-16706523	82.6096	157.127	131.65	125.088	124.39	127.567	123.847
ENSG00000136271	DDX56	7:44565416-44575051	52.7792	103.686	93.9677	87.1929	86.5323	93.366	97.0781
ENSG00000136449	MYCBPAP	17:50508383-50531501	0.883885	0.0765302	0.260301	0.806566	0.583821	0.18162	0.444976
ENSG00000136542	GALNT5	2:157257597-157314211	2.21203	1.04107	1.30012	2.0556	1.07886	1.40057	1.2385
ENSG00000136810	TXN	9:110243810-110256640	287.445	735.026	599.724	519	538.141	567.073	634.034
ENSG00000136813	KIAA0368	9:111360691-111484745	15.7799	30.1772	30.3409	28.5311	23.7149	22.1342	22.3069
ENSG00000136826	KLF4	9:107484851-107490482	5.94338	9.45957	8.07906	7.53397	7.82369	5.21275	8.22085
ENSG00000136830	FAM129B	9:127505338-127578989	53.1273	102.389	94.421	97.589	92.5938	81.9776	100.246
ENSG00000136944	LMX1B	9:126614442-126701032	5.65377	4.20348	4.42169	5.26816	3.18126	3.29141	2.93238
ENSG00000136997	MYC	8:127735433-127741434	8.33944	27.3242	23.9964	25.5316	23.7196	16.5448	28.7528
ENSG00000137054	POLR1E	9:37485934-37503697	9.04378	18.9955	18.2034	17.0838	17.463	16.921	19.9701
ENSG00000137103	TMEM8B	9:35814450-35854847	7.80926	2.57969	2.31177	4.59536	3.53057	3.63541	2.78485
ENSG00000137309	HMGA1	6:34236872-34246231	177.892	432.231	323.229	309.311	274.729	283.884	358.535
ENSG00000137331	IER3	6:30743198-30744554	73.8186	65.4537	86.5152	105.697	125.252	77.4682	151.692
ENSG00000137440	FGFBP1	4:15935568-15938740	1.30268	0.776015	1.60944	1.71916	1.79853	1.76163	1.31362
ENSG00000137474	MYO7A	11:77128263-77215239	9.38453	2.59772	2.59282	3.57278	3.92261	4.21989	3.04434
ENSG00000137547	MRPL15	8:54135209-54147901	31.7195	71.5081	61.2357	58.7688	57.9831	62.8273	61.2835
ENSG00000137628	DDX60	4:168216292-168318807	2.04416	1.2171	2.70786	3.10488	2.12845	1.97989	2.76051
ENSG00000137673	MMP7	11:102520507-102530753	0.440494	1.10969	3.46069	3.26194	2.51011	3.32826	5.21183
ENSG00000137726	FXYD6	11:117836975-117877486	12.8545	2.00333	3.53879	3.81115	3.21552	3.6593	3.0048
ENSG00000137745	MMP13	11:102942994-102955734	0.228651	0.358534	0.743437	0.870804	1.48606	0.58936	1.61124
ENSG00000137752	CASP1	11:105025442-105035250	0.636588	0.999212	0.262235	0.566006	2.01808	0.547824	0.710494
ENSG00000137801	THBS1	15:39581078-39599466	66.9994	32.6981	54.4915	47.9048	38.1444	29.8042	26.6103
ENSG00000137868	STRA6	15:74179465-74212267	5.60896	7.10315	11.1038	13.946	11.5224	12.6645	17.1986
ENSG00000137872	SEMA6D	15:47184100-47774223	1.61193	0.265329	0.370186	0.339425	0.56699	0.325056	0.33509
ENSG00000137975	CLCA2	1:86424085-86456558	0.385617	0.224803	0.194075	0.329815	0.717028	0.43378	1.00513
ENSG00000137996	RTCA	1:100266206-100292769	16.4647	33.433	30.7857	29.6175	29.0764	27.3835	27.4392
ENSG00000138035	PNPT1	2:55634264-55693910	17.0596	35.2434	35.2256	30.6115	31.4529	28.5512	28.2309
ENSG00000138061	CYP1B1	2:38066972-38109902	26.4866	31.6032	31.9587	48.0974	40.2799	26.9498	36.7958
ENSG00000138100	TRIM54	2:27282391-27307439	0.93234	0.121419	0.306079	0.642357	0.86368	0.636626	1.11264
ENSG00000138131	LOXL4	10:98247689-98268250	2.06418	0.535293	0.962593	1.3631	1.50297	0.935502	0.923411
ENSG00000138271	GPR87	3:151294085-151316952	4.24633	9.36246	8.20755	7.21863	7.83688	6.01137	10.2791
ENSG00000138316	ADAMTS14	10:70672802-70762441	1.92637	0.425001	0.727432	0.86692	1.04126	0.811521	0.872372
ENSG00000138347	MYPN	10:68106116-68212017	0.810163	2.07064	1.96299	2.09921	2.31659	1.37805	2.66889
ENSG00000138413	IDH1	2:208236226-208266074	59.847	42.3627	38.8213	38.4882	51.521	51.8746	35.5419
ENSG00000138639	ARHGAP24	4:85475113-86002670	1.09373	0.224766	0.715601	1.78426	1.10294	0.601916	0.373239
ENSG00000138759	FRAS1	4:78057569-78544269	0.971288	0.1991	0.25978	0.230201	0.444482	0.427455	0.284275
ENSG00000138760	SCARB2	4:76158736-76213893	48.3554	28.519	40.6217	46.2127	40.568	35.8388	34.5072
ENSG00000138772	ANXA3	4:78551518-78610451	33.8492	93.0649	88.2397	93.6358	86.5903	70.7684	76.1937
ENSG00000138777	PPA2	4:105369076-105474081	64.2843	75.6328	67.5793	64.103	49.5588	74.1101	47.8678
ENSG00000138795	LEF1	4:108047544-108168956	3.20231	0.903238	1.30613	1.483	1.36293	1.57597	1.17042
ENSG00000138798	EGF	4:109912883-110012266	12.7854	5.47616	6.0808	7.94235	8.07666	7.44112	6.18169
ENSG00000139055	ERP27	12:14914034-14939082	11.2866	35.8635	32.7975	25.9552	33.9745	27.4578	30.1585
ENSG00000139211	AMIGO2	12:47075706-47079951	3.28495	2.79491	3.53795	6.04615	4.61985	3.60643	5.64321
ENSG00000139289	PHLDA1	12:76025446-76033932	13.7286	14.8895	13.083	15.1941	16.8633	11.7491	16.977
ENSG00000139318	DUSP6	12:89347231-89353271	1.81311	1.95499	1.57437	2.57236	2.97223	1.45835	4.69159
ENSG00000139343	SNRPF	12:95858927-95903828	33.4058	76.6892	65.6963	54.064	59.3946	68.6323	71.6034
ENSG00000139344	AMDHD1	12:95943292-95968716	6.99176	8.9671	9.13268	10.4068	8.01056	9.46639	12.1631
ENSG00000139515	PDX1	13:27920019-27926231	0.978175	0.634571	1.05093	0.447981	0.873407	1.02318	0.872285
ENSG00000139547	RDH16	12:56951430-56959374	0.262827	0.0388778	0.103149	0.298991	0.266475	0.195468	0.537204
ENSG00000140368	PSTPIP1	15:76993358-77037332	0.529499	0.512869	0.767683	0.234	0.509301	0.567521	0.303086
ENSG00000140450	ARRDC4	15:97960697-97973838	18.0416	6.21812	7.894	8.29412	8.22025	7.18339	9.15065
ENSG00000140465	CYP1A1	15:74719541-74725610	8.91722	3.28365	3.73372	12.8115	9.51792	6.39633	7.24727
ENSG00000140511	HAPLN3	15:88877287-88895626	3.26493	1.24634	2.17253	2.60939	1.99764	2.39741	2.61493
ENSG00000140545	MFGE8	15:88898682-88913411	37.2008	20.4781	30.6832	46.29	39.3044	34.9855	37.4798
ENSG00000140678	ITGAX	16:31355133-31382997	1.60307	0.780149	0.968994	1.77462	1.84104	0.832471	1.54025
ENSG00000140832	MARVELD3	16:71626160-71642114	12.7348	11.6201	13.0324	13.866	8.12286	10.1587	7.97061
ENSG00000140859	KIFC3	16:57758216-57863053	8.21518	15.5551	12.1479	15.6332	13.9821	12.5214	19.3196
ENSG00000140990	NDUFB10	16:1959507-1961975	76.4467	144.221	123.776	103.698	110.485	113.999	107.243
ENSG00000141040	ZNF287	17:16551386-16569206	4.5453	1.90013	4.12188	2.9844	4.52992	6.23501	5.55524
ENSG00000141391	PRELID3A	18:12407895-12432238	4.19188	5.03094	6.3449	4.96765	7.90719	4.46603	8.94559
ENSG00000141433	ADCYAP1	18:904942-912172	0.471826	0.0930324	0.637918	0.26956	0.14074	0.167927	0.151844
ENSG00000141522	ARHGDIA	17:81867720-81871406	102.202	239.19	212.461	190.769	168.632	176.184	208.359
ENSG00000141574	SECTM1	17:82321023-82334074	4.98345	3.02401	4.52734	5.52074	3.24042	6.99426	5.69772
ENSG00000141622	RNF165	18:46326808-46463140	0.883906	0.525833	0.379347	1.09653	0.546706	0.519434	0.709104
ENSG00000141933	TPGS1	19:507496-519654	3.58928	3.60115	3.80759	4.01162	1.69852	3.25917	1.62866
ENSG00000141971	MVB12A	19:17405721-17433724	37.6451	39.6977	34.294	38.1534	32.0572	45.9491	35.8625
ENSG00000142156	COL6A1	21:45981736-46005050	38.5249	26.0965	36.8186	39.2997	32.3041	27.4787	41.2702
ENSG00000142173	COL6A2	21:46098096-46132849	31.8957	15.3479	23.0226	24.0732	19.8679	19.6783	20.9132
ENSG00000142347	MYO1F	19:8520789-8577577	1.02361	0.498547	0.933224	0.188783	1.57426	0.855563	1.17365
ENSG00000142494	SLC47A1	17:19495384-19579034	0.865613	0.184506	0.30742	0.25592	0.251261	0.208728	0.270267
ENSG00000142507	PSMB6	17:4796143-4798503	97.1864	194.797	165.888	154.251	153.701	188.339	162.074
ENSG00000142544	CTU1	19:51097605-51108370	2.01559	3.25251	2.57863	2.32042	1.27727	2.53948	2.38005
ENSG00000142552	RCN3	19:49527617-49546962	0.620034	0.498264	0.732584	0.749319	0.38946	0.490413	1.73257
ENSG00000142609	CFAP74	1:1921950-2003837	1.59354	0.368874	0.592729	0.58824	0.542816	0.464775	0.764595
ENSG00000142623	PADI1	1:17205125-17246005	1.198	2.99522	3.11905	3.79887	3.15534	2.91234	5.63544
ENSG00000142627	EPHA2	1:16124336-16156087	42.7698	51.7697	59.1893	54.9622	66.0047	43.3013	62.7369
ENSG00000142784	WDTC1	1:27234515-27308633	13.6774	5.30742	4.43549	5.98434	6.61759	6.6922	5.89088
ENSG00000142871	CYR61	1:85580760-85583962	214.222	95.4064	218.185	175.266	181.797	118.367	164.006
ENSG00000143061	IGSF3	1:116574398-116667755	16.674	6.42696	8.76567	10.8583	9.45135	7.64148	7.66106
ENSG00000143126	CELSR2	1:109250018-109275750	10.5398	4.67809	6.97203	6.66904	6.48932	5.84941	7.27455
ENSG00000143178	TBX19	1:168281039-168314426	1.74188	1.00116	1.7789	2.06684	1.62411	1.82747	2.17053
ENSG00000143226	FCGR2A	1:161505429-161524013	0.406373	0.133616	0.0145747	0.0291226	1.754	0.426976	0.140655
ENSG00000143314	MRPL24	1:156737302-156741590	48.7744	105.755	91.5517	86.6512	92.76	106.811	99.7327
ENSG00000143333	RGS16	1:182598622-182604408	3.05011	2.14033	2.30181	1.47527	2.86946	2.13367	2.11581
ENSG00000143341	HMCN1	1:185734550-186190949	2.51743	0.167364	0.591781	0.246544	0.16109	1.05113	0.120043
ENSG00000143367	TUFT1	1:151540304-151583583	30.911	35.5444	35.1918	38.6362	48.899	33.2702	39.0518
ENSG00000143369	ECM1	1:150508061-150513789	49.9945	32.0581	45.0558	65.1764	67.7412	43.0583	70.1847
ENSG00000143401	ANP32E	1:150218416-150236156	81.7908	149.772	131.14	97.0207	114.076	115.463	112.02
ENSG00000143412	ANXA9	1:150982016-150995634	29.4855	15.7569	14.0686	12.2639	16.8903	19.3098	12.764
ENSG00000143434	SEMA6C	1:151131684-151146664	6.60279	1.66989	1.7024	2.51905	2.91147	2.15443	3.07824
ENSG00000143494	VASH2	1:212950519-212992037	3.20084	1.91965	2.33262	1.93112	1.74058	2.16397	0.996553
ENSG00000143512	HHIPL2	1:222522257-222548103	0.724517	0.706809	0.952242	1.03639	1.13401	0.477375	1.49369
ENSG00000143515	ATP8B2	1:154325552-154351307	9.6778	3.39393	5.53256	5.58049	5.62914	5.11005	3.89101
ENSG00000143603	KCNN3	1:154697454-154870280	3.0398	0.263778	0.593946	1.03829	0.71426	0.746848	0.25518
ENSG00000143891	GALM	2:38665909-38741237	9.38603	6.27242	6.75546	5.94743	9.41145	9.74702	7.90167
ENSG00000144034	TPRKB	2:73729103-73737400	45.5362	88.6202	76.2269	68.4679	77.6714	77.0111	85.7808
ENSG00000144063	MALL	2:110083869-110116566	1.66717	8.50957	7.98887	6.78518	5.90231	7.05862	10.9888
ENSG00000144136	SLC20A1	2:112645856-112663827	14.4349	20.0429	25.8856	29.5392	29.3169	18.3154	29.1918
ENSG00000144152	FBLN7	2:112138384-112188216	1.88113	0.451729	0.59286	1.39043	0.932987	0.567899	0.256728
ENSG00000144218	AFF3	2:99545418-100142739	1.00706	0.55926	0.977736	0.49178	0.244404	1.16849	0.121242
ENSG00000144228	SPOPL	2:138501800-138573547	6.07983	6.33536	4.70696	4.10518	6.02319	3.29499	3.99694
ENSG00000144285	SCN1A	2:165989159-166128047	0.0713458	0.0299457	0.0449581	0.0449127	0.0349978	0.0110684	9.51274
ENSG00000144355	DLX1	2:172084739-172089677	1.04254	0.711771	0.940749	1.26952	1.43285	0.519004	1.50005
ENSG00000144583	2016-03-04	2:216257864-216372027	0.0771901	3.8206	3.09834	4.00915	2.30266	1.29568	3.94053
ENSG00000144642	RBMS3	3:29280981-30010391	0.579255	0.21722	0.28406	0.743689	0.750633	0.132161	0.243945
ENSG00000144824	PHLDB2	3:111732496-111976517	15.3759	28.9145	30.5339	30.1796	29.2158	19.0338	27.7543
ENSG00000145020	AMT	3:49416777-49422753	5.77707	1.14652	2.63905	3.6714	5.10391	2.54628	3.88456
ENSG00000145050	MANF	3:51385046-51389397	48.2324	56.5744	56.9131	51.3889	43.3361	69.8924	54.3258
ENSG00000145220	LYAR	4:4267700-4290169	16.3512	42.9369	38.4013	32.5583	35.8322	31.7835	43.8293
ENSG00000145293	ENOPH1	4:82430561-82461091	24.5304	50.5464	39.7717	39.9233	39.8446	37.7396	37.1165
ENSG00000145494	NDUFS6	5:1801399-1816605	141.284	260.374	223.311	200.742	204.48	228.349	217.788
ENSG00000145526	CDH18	5:19472950-20575873	1.69317	0.0616167	0.337474	0.702449	0.531216	0.783285	0.188094
ENSG00000145824	CXCL14	5:135570678-135579279	73.5966	1.91927	3.82003	3.52013	3.47384	7.26772	1.99783
ENSG00000145882	PCYOX1L	5:149358006-149369653	5.10057	1.41156	2.11155	2.77694	2.23901	2.63936	2.16715
ENSG00000146021	KLHL3	5:137617499-137736090	1.17685	0.584923	0.542679	1.36765	0.726508	0.554528	0.784941
ENSG00000146197	SCUBE3	6:35214418-35253079	1.16322	0.240505	0.51003	0.583135	0.523616	0.4245	0.378841
ENSG00000146223	RPL7L1	6:42879617-42889925	47.3953	86.9425	73.6775	68.8039	69.4092	63.3799	64.3491
ENSG00000146278	PNRC1	6:89080750-89085160	14.5664	3.03165	4.40888	6.43858	8.51919	7.99828	9.14195
ENSG00000146350	TBC1D32	6:121079493-121334745	3.89485	2.28701	3.3511	5.54785	2.45164	2.8169	2.48167
ENSG00000146674	IGFBP3	7:45912244-45921874	9.67804	13.3373	25.7111	35.8714	38.4841	32.1008	106.919
ENSG00000146731	CCT6A	7:56051629-56063989	129.497	302.052	291.521	256.92	257.519	273.059	292.483
ENSG00000146842	TMEM209	7:130164714-130207770	13.4767	11.2723	16.5109	15.4525	15.0694	13.4904	13.7563
ENSG00000147119	CHST7	X:46573783-46598408	2.07591	1.4181	1.62019	2.03496	1.38496	1.91938	1.00227
ENSG00000147166	ITGB1BP2	X:71301733-71305371	0.148876	0.234387	0.2806	1.33259	0.496612	0.265944	0.432523
ENSG00000147174	ACRC	X:71578410-71613583	0.176776	0.215539	0.596119	0.397892	0.403368	0.339844	0.653104
ENSG00000147251	DOCK11	X:118495897-118686163	1.2818	0.269696	0.401696	0.441901	0.692271	0.569517	0.737766
ENSG00000147257	GPC3	X:133535744-133985895	8.86246	2.04856	3.00659	3.16899	3.05782	2.08097	2.80012
ENSG00000147408	CSGALNACT1	8:19404160-19758029	1.97364	4.91674	4.41784	7.75242	5.58609	4.00928	5.35274
ENSG00000147437	GNRH1	8:25419259-25424654	1.14702	0.522387	0.984339	0.618774	2.10678	0.742186	0.949598
ENSG00000147642	SYBU	8:109573977-109691791	20.5413	13.3123	12.88	10.1174	9.29116	10.7966	5.77839
ENSG00000147697	GSDMC	8:129748195-129786888	0.590422	1.81677	0.989967	0.988979	1.70856	1.28686	2.2752
ENSG00000147804	SLC39A4	8:144409741-144416895	27.9746	79.469	65.1515	52.7377	54.7804	63.1586	57.7418
ENSG00000148218	ALAD	9:113386316-113401333	18.5916	8.34872	10.3337	10.7396	10.3913	10.9043	10.0124
ENSG00000148344	PTGES	9:129738330-129753047	20.6195	59.5001	52.1173	49.5585	70.2157	55.0757	81.1621
ENSG00000148346	LCN2	9:128149070-128153455	18.1901	6.91215	22.0291	42.1074	45.4445	29.8356	25.1306
ENSG00000148677	ANKRD1	10:90912095-90921276	4.82659	7.34474	11.826	16.4298	18.6249	8.94782	8.62556
ENSG00000148700	ADD3	10:109996367-110135565	30.557	18.7159	19.2489	16.248	18.7209	17.119	11.4207
ENSG00000148841	ITPRIP	10:104309697-104338404	1.0188	0.609328	1.10219	1.19633	1.39488	1.10859	1.50469
ENSG00000148848	ADAM12	10:126012380-126388455	0.114703	0.359025	0.245379	0.275225	0.872027	0.158177	0.595642
ENSG00000149050	ZNF214	11:6999317-7020368	0.906873	0.317849	0.882761	0.423496	0.49705	0.443042	0.422206
ENSG00000149131	SERPING1	11:57597386-57614853	39.7886	9.12969	13.0503	17.9298	19.0419	16.5735	14.3126
ENSG00000149150	SLC43A1	11:57484533-57515786	1.12859	0.517044	0.359357	0.904137	1.44742	0.777544	0.73673
ENSG00000149212	SESN3	11:95165512-95232541	0.990504	0.0858728	0.157791	0.193113	0.187188	0.177536	0.146537
ENSG00000149531	FRG1BP	20:30377371-30399257	9.39909	5.28153	5.19916	7.02985	9.3545	4.8706	7.68829
ENSG00000149564	ESAM	11:124752582-124762290	1.07924	0.262704	0.771704	0.489929	0.750477	0.888424	0.643197
ENSG00000149591	TAGLN	11:117199320-117204782	5.36438	26.4308	34.8988	121.853	36.2574	36.7208	40.1932
ENSG00000149926	FAM57B	16:30024426-30052978	0.605326	0.124832	0.204802	0.321275	0.508679	0.0684789	0.41648
ENSG00000149948	HMGA2	12:65824130-65966295	15.5255	45.8924	32.6586	26.5751	18.1597	20.7609	25.1231
ENSG00000150347	ARID5B	10:61901299-62096944	34.3041	11.8991	12.3138	9.69512	9.25362	11.9897	7.65353
ENSG00000150394	CDH8	16:61647241-62037035	0.998035	0.646535	0.847884	0.63781	0.979744	0.654744	0.339292
ENSG00000150556	LYPD6B	2:149038106-149215262	32.342	29.7981	34.5065	51.1495	44.7344	38.8206	29.8536
ENSG00000150636	CCDC102B	18:68715208-69055189	0.187356	0.0258587	0.398872	0.615106	0.330449	0.372749	0.160826
ENSG00000150672	DLG2	11:83455011-85627922	0.450738	0.726257	1.06403	0.382294	0.822881	0.479994	0.493165
ENSG00000150687	PRSS23	11:86791058-86952910	19.2602	44.3715	45.256	39.7296	33.2519	38.7262	37.654
ENSG00000150893	FREM2	13:38687128-38887131	4.25513	1.28573	1.72258	1.65562	1.8277	1.34765	0.816
ENSG00000150990	DHX37	12:124946824-124989122	9.21073	17.7345	16.4467	15.7371	13.834	14.3512	15.9161
ENSG00000151012	SLC7A11	4:138164096-138242349	2.2543	2.21734	2.79102	4.36314	6.00641	2.73227	3.33405
ENSG00000151025	GPR158	10:25175061-25602226	0.0996068	0.44782	0.0774193	0.0281235	0.0701962	0.0666564	0.0190541
ENSG00000151117	TMEM86A	11:18693121-18704785	1.69302	0.53176	0.513272	0.997754	0.817625	1.01303	0.583178
ENSG00000151150	ANK3	10:60026297-60733490	5.99194	1.9695	3.03947	2.32837	3.48509	4.33122	2.82642
ENSG00000151322	NPAS3	14:32934932-33804176	0.705377	0.095536	0.376446	0.993045	0.598523	0.364235	1.2554
ENSG00000151651	ADAM8	10:133262402-133276868	5.18983	4.52552	5.54461	9.26222	7.62378	5.0508	8.66866
ENSG00000151883	PARP8	5:50665898-50846522	0.187198	0.140332	0.453557	0.0842248	0.243844	0.0854405	0.171065
ENSG00000152076	CCDC74B	2:130139286-130145134	2.5307	0.949042	1.2972	1.6435	1.47247	1.24918	1.20305
ENSG00000152223	EPG5	18:45847608-45967274	2.36027	1.32823	1.49569	1.78855	1.66078	1.17813	1.9656
ENSG00000152292	SH2D6	2:85418720-85437029	0.0807708	0	0.172201	0.817635	0	0	0.122767
ENSG00000152377	SPOCK1	5:136975297-137598379	28.5583	17.3923	20.4803	19.8812	21.5446	12.0857	14.548
ENSG00000152443	ZNF776	19:57746795-57758159	2.08219	0.967475	1.70407	0.696536	0.934759	1.24799	1.66696
ENSG00000152503	TRIM36	5:115124761-115180546	1.57845	1.84514	2.11489	1.20042	1.7216	1.42169	1.41973
ENSG00000152527	PLEKHH2	2:43637272-43767987	5.56629	1.86919	2.22798	1.94325	3.24318	2.86058	3.48419
ENSG00000152795	HNRNPDL	4:82422563-82430408	132.416	233.027	244.067	170.685	187.677	179.969	188.907
ENSG00000153071	DAB2	5:39371674-39462300	7.46658	5.61219	3.95123	4.91659	7.54092	3.52991	4.2741
ENSG00000153132	CLGN	4:140388454-140427968	12.2266	5.40429	8.37244	8.48255	11.2478	8.69791	6.17196
ENSG00000153294	ADGRF4	6:47685863-47722021	1.49312	2.85956	4.09896	3.83016	4.31025	3.16774	5.86553
ENSG00000153310	FAM49B	8:129839592-130017129	50.6147	91.3979	73.3391	67.1062	63.74	65.8332	59.6462
ENSG00000153317	ASAP1	8:130052103-130443660	21.6933	22.5472	24.8413	24.0002	22.2078	13.0867	15.6768
ENSG00000153395	LPCAT1	5:1456479-1523977	37.3938	28.6936	35.8603	43.0678	34.0757	36.905	52.6566
ENSG00000153714	LURAP1L	9:12775020-12822131	0.499966	0.193315	0.311037	0.621553	0.52082	0.280242	0.874
ENSG00000153982	GDPD1	17:59220466-59275967	2.41594	0.329436	1.04429	1.31706	1.05541	1.86079	1.23833
ENSG00000154027	AK5	1:77282050-77559969	1.32828	0.599818	0.392114	0.262467	0.976163	0.442041	0.528722
ENSG00000154153	FAM134B	5:16473037-16617058	8.24837	4.67302	6.80446	7.68834	11.4768	7.93498	8.57248
ENSG00000154175	ABI3BP	3:100749155-100993515	2.97742	0.667707	0.987212	1.4385	0.654628	0.809748	1.00296
ENSG00000154265	ABCA5	17:69244310-69327244	7.16416	3.91292	4.1341	6.48007	6.38243	4.58213	5.80354
ENSG00000154310	TNIK	3:171061338-171460408	7.61281	10.7396	9.95387	5.86412	6.37322	6.63002	5.11916
ENSG00000154447	SH3RF1	4:169094255-169271105	4.05972	6.02105	5.83754	5.39274	6.4197	4.10857	5.0721
ENSG00000154556	SORBS2	4:185585443-185956652	1.69278	1.97888	1.23728	2.03773	1.51148	1.596	0.733625
ENSG00000154645	CHODL	21:17901262-18267373	2.86907	2.02943	2.12353	3.5565	2.3491	2.90284	2.10435
ENSG00000155100	OTUD6B	8:91070195-91087095	5.14682	10.4262	8.30782	7.26596	8.54325	5.2169	6.76291
ENSG00000155115	GTF3C6	6:110958559-110967890	19.8717	54.2807	44.9908	37.5515	38.5144	38.6145	39.3595
ENSG00000155465	SLC7A7	14:22773221-22829820	4.01326	2.27871	2.71639	4.53626	4.54272	4.94228	2.72996
ENSG00000155792	DEPTOR	8:119873716-120050913	0.412641	0.615928	0.231392	1.19235	0.4174	0.423343	0.626283
ENSG00000155918	RAET1L	6:150018333-150025532	0.798901	1.35333	1.40388	1.49796	2.54555	1.42846	1.71459
ENSG00000155962	CLIC2	X:155276210-155334657	0.483501	0.122569	0.592827	0.098859	0.878004	0.539072	0.195543
ENSG00000156261	CCT8	21:29055804-29073797	103.644	195.674	182.841	170.768	162.327	173.338	181.798
ENSG00000156427	FGF18	5:171419655-171457623	2.54124	2.28251	2.00239	1.91052	1.9789	2.41417	1.24485
ENSG00000156453	PCDH1	5:141853110-141879246	7.37989	5.34601	7.65523	9.37533	9.99587	7.40483	8.85957
ENSG00000156509	FBXO43	8:100133359-100145800	1.00236	0.374316	0.611363	0.710882	0.357095	0.717865	0.45329
ENSG00000156587	UBE2L6	11:57551655-57568284	15.903	9.0305	10.7847	10.5802	13.5311	17.321	10.3748
ENSG00000156804	FBXO32	8:123497888-123541206	3.07582	3.72603	4.52622	8.96027	10.0913	7.68029	12.5797
ENSG00000157036	EXOG	3:38496126-38542161	3.78191	2.57435	3.381	1.90389	6.3015	2.56152	2.80007
ENSG00000157168	NRG1	8:31639385-32767959	4.38269	14.7725	11.9835	11.0655	15.2196	10.338	10.2178
ENSG00000157227	MMP14	14:22836556-22849027	35.8895	10.0232	14.322	21.962	21.9046	18.5611	15.1523
ENSG00000157379	DHRS1	14:24290597-24299833	13.1393	9.76409	8.30225	13.4564	11.3536	11.1039	10.7951
ENSG00000157514	TSC22D3	X:107713220-107777342	7.76322	5.81659	4.53717	4.80259	7.88343	6.0108	5.32767
ENSG00000157551	KCNJ15	21:38157033-38307357	0.0611529	0.0539864	0.0481851	0.51973	0.0772269	0.0401238	0.332059
ENSG00000157613	CREB3L1	11:46277660-46321422	0.407856	0.770797	1.83485	1.30598	1.44925	0.725368	2.30157
ENSG00000157637	SLC38A10	17:81244999-81295547	37.8935	18.864	27.7963	32.2824	30.5386	29.4321	28.1639
ENSG00000157890	MEGF11	15:65895078-66253747	0.399939	0.376701	0.315617	0.197061	0.176406	0.810174	0.679551
ENSG00000158014	SLC30A2	1:26037251-26046133	0.400565	0.5467	0.657371	0.820814	0.7283	0.267758	0.50476
ENSG00000158050	DUSP2	2:96143165-96145440	11.1662	2.10369	4.66531	2.46041	4.39734	1.95918	4.20764
ENSG00000158106	RHPN1	8:143368854-143384220	11.9226	5.79091	6.26782	7.92225	8.80676	7.23456	11.433
ENSG00000158125	XDH	2:31334320-31414715	0.373479	1.61731	1.54125	2.25205	2.80764	1.0325	2.78004
ENSG00000158220	ESYT3	3:138434585-138481686	3.66772	1.20894	1.8729	1.80653	2.19303	1.55678	2.80326
ENSG00000158373	HIST1H2BD	6:26158145-26171349	34.3477	31.1237	27.7877	18.7843	27.0442	30.172	25.6276
ENSG00000158406	HIST1H4H	6:26277608-26285638	4.38973	5.19696	4.18224	3.15851	5.7194	3.86344	5.38306
ENSG00000158716	DUSP23	1:159780931-159782543	27.8924	31.3731	27.8592	25.1062	19.7139	34.8169	20.7247
ENSG00000158813	EDA	X:69616066-70039469	0.714957	0.48147	0.654223	0.203246	0.582211	0.615304	0.265852
ENSG00000158863	FAM160B2	8:22089158-22104898	10.8294	9.22024	9.04119	11.5043	11.4883	9.39335	18.4718
ENSG00000159079	C21orf59	21:32592078-32612866	33.6891	65.6057	54.517	51.097	49.5846	63.5362	58.7867
ENSG00000159164	SV2A	1:149903317-149917882	11.8103	4.89993	6.31764	6.86701	5.95763	5.98485	4.57881
ENSG00000159166	LAD1	1:201373243-201399915	25.5649	63.4765	53.5508	42.7476	35.1197	45.2761	48.5644
ENSG00000159167	STC1	8:23841914-23854807	3.40384	5.8109	5.31406	3.50166	5.7932	6.17607	12.3001
ENSG00000159251	ACTC1	15:34788095-34796139	0.792468	0.880566	0.640172	1.47404	0.671174	0.226164	0.411355
ENSG00000159307	SCUBE1	22:43197282-43343388	7.97548	4.85917	3.95159	4.06201	3.037	4.28073	1.74713
ENSG00000159307	SCUBE1	22:43270131-43272539	0.138714	0.582882	0.184738	0.369524	0.409276	0.441058	0.44307
ENSG00000159339	PADI4	1:17308194-17364004	1.3263	2.22243	2.58341	1.33989	4.38299	5.37848	5.74686
ENSG00000159388	BTG2	1:203305490-203309602	39.8064	6.79952	10.3665	8.17982	10.3562	8.48578	7.51378
ENSG00000159399	HK2	2:74833980-74893359	2.02296	6.58892	5.56003	5.05977	5.29901	4.30474	7.72033
ENSG00000159433	STARD9	15:42575658-42720981	0.625312	0.279241	0.335093	1.1304	0.59892	0.409773	0.415579
ENSG00000159450	TCHH	1:152106316-152115454	0.875116	0.886157	0.932755	1.29052	1.77291	0.991504	1.30515
ENSG00000159618	ADGRG5	16:57542420-57591681	1.52611	0.355232	0.630609	0.3457	0.515695	0.509036	0.299238
ENSG00000159640	ACE	17:63477060-63498380	8.17779	9.31106	11.3777	11.1245	12.3675	7.85156	12.9854
ENSG00000160072	ATAD3B	1:1471768-1497848	10.2332	13.639	17.9166	16.4249	16.3546	12.7296	24.0056
ENSG00000160124	CCDC58	3:122359590-122383231	23.997	61.949	60.0017	49.7075	51.621	48.0721	60.5869
ENSG00000160161	CILP2	19:19538247-19546659	12.4469	4.2121	6.25366	6.86996	5.5848	5.63448	4.98202
ENSG00000160179	ABCG1	21:42199688-42297244	3.44234	0.5155	0.772947	0.932154	0.911758	1.30513	0.480564
ENSG00000160183	TMPRSS3	21:42371889-42396846	8.16874	2.4719	4.02907	3.35831	3.74602	4.51189	3.07944
ENSG00000160190	SLC37A1	21:42496007-42581440	2.91927	1.49302	2.91039	3.72881	3.28615	2.09759	2.89683
ENSG00000160193	WDR4	21:42843093-42879568	4.54915	20.3209	14.8352	14.4038	11.4032	12.104	14.2472
ENSG00000160201	U2AF1	21:43092955-43107587	69.0289	104.828	96.7866	90.2278	92.172	99.2914	100.835
ENSG00000160255	ITGB2	21:44885952-44931989	17.5453	8.62905	13.9156	19.1186	16.8859	14.0365	11.8381
ENSG00000160703	NLRX1	11:119166567-119184016	3.76596	2.98842	2.55694	3.87658	2.13529	2.2806	2.13654
ENSG00000160801	PTH1R	3:46877745-46903799	0.944712	0.53706	0.903126	0.442193	1.26487	0.59788	1.15799
ENSG00000160818	GPATCH4	1:156594486-156601496	21.4148	64.8566	56.563	46.1856	45.9444	49.1433	58.6265
ENSG00000160888	IER2	19:13150414-13154908	51.5901	14.5009	20.3759	14.8218	20.3688	15.2742	24.2151
ENSG00000160932	LY6E	8:143017981-143023832	499.828	315.351	298.958	369.278	286.897	435.76	276.25
ENSG00000160951	PTGER1	19:14472465-14475362	1.03632	0.701729	0.711363	1.5796	0.394079	0.462689	0.106912
ENSG00000160963	COL26A1	7:101362819-101559024	3.61135	2.4484	2.63277	2.86491	1.66122	2.34115	1.62128
ENSG00000160999	SH2B2	7:102285090-102321711	3.71512	2.55046	2.74509	2.7939	1.96842	3.6902	2.32514
ENSG00000161040	FBXL13	7:102813229-103074843	0.375375	0.577836	0.178207	0.545737	0.515628	0.376072	0.391516
ENSG00000161055	SCGB3A1	5:180590102-180591540	0.751242	0.131513	0.296571	0.701728	0.246243	1.32779	0
ENSG00000161960	EIF4A1	17:7572705-7579005	166.228	418.649	373.986	339.15	316.935	333.144	378.116
ENSG00000162078	ZG16B	16:2830168-2839585	0.225379	0.318985	0.667922	0.659232	0.836256	0.137124	0.694537
ENSG00000162302	RPS6KA4	11:64359147-64372215	14.8304	26.7193	23.6476	21.9467	17.4365	17.5109	20.2428
ENSG00000162377	COA7	1:52684450-52698366	9.37866	21.2352	17.6385	14.3898	15.3654	15.4679	13.9156
ENSG00000162408	NOL9	1:6521346-6554535	7.73964	14.8595	12.0721	10.4875	9.74416	11.2043	9.86024
ENSG00000162545	CAMK2N1	1:20482390-20486220	27.0151	52.7712	45.8199	45.5333	39.2262	57.034	63.0993
ENSG00000162552	WNT4	1:22117304-22143969	3.66148	0.802333	1.28087	1.67207	1.42905	1.77052	1.03212
ENSG00000162591	MEGF6	1:3489919-3611495	26.9029	10.1768	13.4413	15.7366	13.573	10.4979	15.4037
ENSG00000162620	LRRIQ3	1:74026014-74198187	1.45298	1.13495	0.609495	1.08277	0.743967	1.9406	0.94195
ENSG00000162645	GBP2	1:89106131-89150456	6.35295	2.72873	3.8479	3.56334	8.86391	7.36382	7.04205
ENSG00000162664	ZNF326	1:89995111-90035531	23.1372	43.4849	41.4008	35.264	34.3801	35.3188	39.9613
ENSG00000162669	HFM1	1:91260765-91404869	0.947504	0.915533	0.870735	1.24209	1.19948	0.424143	0.665395
ENSG00000162729	IGSF8	1:160091339-160098943	19.5841	8.88048	13.0065	13.5	13.8347	16.1506	16.4352
ENSG00000162755	KLHDC9	1:161098360-161100346	10.0361	3.98352	6.88592	6.79896	6.35476	7.75634	8.02647
ENSG00000162772	ATF3	1:212565333-212620777	12.0247	9.19166	12.853	19.1138	22.2286	10.3988	17.5325
ENSG00000162894	FCMR	1:206904385-206923247	0.578273	1.38768	0.507696	0.726402	0.912684	0.676082	0.36347
ENSG00000163009	C2orf48	2:10141381-10211725	0.168642	0.886612	0.114192	0.406579	0.260289	0.256583	0.582532
ENSG00000163064	EN1	2:118842170-118847678	0.54392	0.323454	0.428546	0.713583	0.249308	0.444263	0.367293
ENSG00000163082	SGPP2	2:222424516-222560948	1.30597	0.452248	0.905385	0.657818	0.666969	0.904563	0.738036
ENSG00000163121	NEURL3	2:96497642-96508109	1.0991	0.175782	0.410936	1.29094	0.958335	0.551219	0.449608
ENSG00000163170	BOLA3	2:74135397-74147994	65.875	143.7	115.057	90.3332	91.6431	102.028	105.516
ENSG00000163191	S100A11	1:152032505-152047907	708.796	1445.89	1295.5	1220.65	1295.16	1156.35	1450.81
ENSG00000163207	IVL	1:152908544-152911886	0.146602	0.307701	0.643565	0.725425	1.13139	0.490807	0.781524
ENSG00000163220	S100A9	1:153357853-153361027	7.70031	26.2834	32.0774	42.039	51.9444	39.8415	91.5933
ENSG00000163283	ALPP	2:232378533-232382889	100.119	150.771	142.695	142.519	118.661	179.314	82.4825
ENSG00000163286	ALPPL2	2:232406842-232410714	20.8118	15.8922	17.1353	15.9557	15.7116	27.0959	11.1563
ENSG00000163331	DAPL1	2:158795316-158862958	10.6376	1.92244	0.729116	0.839886	1.66022	1.6126	0.880737
ENSG00000163346	PBXIP1	1:154944075-154956123	45.2137	7.71408	12.3834	17.4242	22.0301	18.5793	19.2158
ENSG00000163347	CLDN1	3:190305700-190322475	7.64004	7.7814	10.8279	17.5866	18.7152	8.67351	13.5356
ENSG00000163430	FSTL1	3:120392292-120451253	33.7955	30.4456	32.4396	42.2571	34.0701	20.9314	22.6897
ENSG00000163431	LMOD1	1:201896451-201946588	1.79312	0.332265	0.368126	0.581574	0.512301	0.474838	0.463516
ENSG00000163520	FBLN2	3:13549130-13638422	90.2007	32.7938	43.6231	48.6638	46.1774	52.8114	46.1152
ENSG00000163531	NFASC	1:204828650-205022822	10.1266	3.85969	4.84042	6.94648	7.30176	4.23789	5.01724
ENSG00000163536	SERPINI1	3:167735242-167825568	2.66657	1.04291	1.51765	2.15454	4.32352	1.98381	2.18134
ENSG00000163565	IFI16	1:158999967-159055155	12.7834	14.013	14.4441	13.1472	20.0882	17.7385	20.1436
ENSG00000163584	RPL22L1	3:170864874-170870483	20.3086	60.5519	53.5874	42.3749	48.6647	44.8752	65.944
ENSG00000163631	ALB	4:73397113-73421412	0	0	0.026406	0.105555	0.105113	0.538058	0.0664588
ENSG00000163660	CCNL1	3:157146507-157160760	32.6761	19.2915	32.5985	26.5079	31.116	24.6798	41.6406
ENSG00000163704	PRRT3	3:9945541-9952394	10.3687	2.7345	3.74642	4.21278	3.73052	4.15742	3.17926
ENSG00000163811	WDR43	2:28894642-28948222	25.0464	58.272	56.1694	41.7276	52.3441	40.3261	51.4659
ENSG00000163864	NMNAT3	3:139560179-139678017	2.85304	0.627827	1.01752	1.12114	0.59328	1.00229	0.720075
ENSG00000163874	ZC3H12A	1:37474551-37484379	5.52733	4.28364	4.90247	3.90656	7.71549	4.64698	6.93759
ENSG00000163898	LIPH	3:185506261-185552613	3.38717	3.13925	3.4457	6.06521	6.53791	3.94882	4.98946
ENSG00000163993	S100P	4:6693068-6697170	3.23459	3.02343	4.4656	4.28224	14.3831	11.0776	11.0564
ENSG00000163995	ABLIM2	4:7965309-8158832	3.12745	2.34232	2.08875	2.36273	2.54718	3.56091	1.69995
ENSG00000164007	CLDN19	1:42733092-42740254	0.471018	0	0.0194562	0.048473	0.0585775	0.172389	0.0640641
ENSG00000164050	PLXNB1	3:48403853-48430051	24.4085	10.2953	13.2457	14.4192	16.1636	11.8498	19.903
ENSG00000164061	BSN	3:49554488-49671545	0.468872	0.072031	0.108703	0.159804	0.259593	0.127367	0.138844
ENSG00000164120	HPGD	4:174490176-174523154	0.428044	0.156356	0.0480421	0.576189	0.254901	0.307209	0.147974
ENSG00000164134	NAA15	4:139301454-139420033	14.278	33.4827	29.9718	23.9262	21.7828	20.7944	20.593
ENSG00000164171	ITGA2	5:52989325-53094779	27.8662	34.7363	40.8098	59.1891	38.4958	26.6585	42.0354
ENSG00000164176	EDIL3	5:83940553-84384793	4.55136	2.14744	3.83247	5.4712	4.36316	4.65878	2.85767
ENSG00000164181	ELOVL7	5:60751790-60844389	7.00918	4.52609	6.63826	7.42146	6.47565	5.41963	5.18957
ENSG00000164182	NDUFAF2	5:60945128-61153037	31.2689	66.8944	63.2947	59.1462	69.301	61.8156	73.1878
ENSG00000164187	LMBRD2	5:36098411-36151961	15.8657	8.35826	12.7771	12.6645	11.0404	9.13693	9.97005
ENSG00000164236	ANKRD33B	5:10564329-10657816	6.28014	8.59277	11.1758	11.8983	10.8083	4.62578	7.89733
ENSG00000164300	SERINC5	5:80111650-80256079	11.4607	3.7454	4.86811	5.66207	5.92707	5.88172	4.86567
ENSG00000164430	MB21D1	6:73413514-73452276	4.08302	8.25733	8.23563	8.04133	7.20611	6.58709	7.48238
ENSG00000164442	CITED2	6:139371806-139374620	18.2112	25.8053	37.0597	41.2676	41.1069	29.7934	27.1489
ENSG00000164463	CREBRF	5:173056351-173139284	2.77326	0.489717	0.843249	0.92281	1.45772	0.793933	0.920518
ENSG00000164627	KIF6	6:39329989-39725405	2.52387	1.46576	1.51251	1.72519	1.84654	2.72693	1.11072
ENSG00000164687	FABP5	8:81280362-81284777	5.567	22.134	18.1617	15.6755	20.2899	13.3107	19.3236
ENSG00000164746	C7orf57	7:48035510-48061304	1.57898	0.73598	0.974589	0.702748	1.21222	0.565813	0.691585
ENSG00000164815	ORC5	7:104126340-104208047	12.216	23.7235	20.1959	19.8903	19.3289	18.8098	17.9858
ENSG00000164867	NOS3	7:150990994-151014588	0.282633	0.098973	0.107947	0.149816	0.772657	0.114705	0.229532
ENSG00000164930	FZD6	8:103298432-103332866	27.1529	13.8211	20.0837	17.764	18.9034	16.6954	13.9675
ENSG00000164970	FAM219A	9:34398183-34458570	10.6852	12.6815	11.2063	16.3711	12.7743	12.7423	14.2507
ENSG00000164972	C9orf24	9:34379018-34397832	0.369038	0.115172	0.254519	0.61964	1.10948	0.0912132	0.10855
ENSG00000164976	KIAA1161	9:34366669-34376853	7.98164	3.43581	5.0594	5.56942	5.75559	5.21751	4.46264
ENSG00000165029	ABCA1	9:104781001-104928237	2.86691	1.16647	1.33442	0.840198	1.39256	1.48067	0.858751
ENSG00000165215	CLDN3	7:73768996-73770270	13.3804	6.81613	8.4112	9.99052	6.61606	10.6856	6.3288
ENSG00000165240	ATP7A	X:77910655-78050395	4.67611	1.70199	1.86525	1.99163	2.0984	1.85018	1.49626
ENSG00000165271	NOL6	9:33461440-33473930	8.06869	17.6233	17.9585	19.0661	17.6526	18.1878	21.79
ENSG00000165272	AQP3	9:33441153-33447611	11.239	3.78399	4.76036	4.46105	6.41231	8.46934	7.2941
ENSG00000165283	STOML2	9:35099775-35103195	83.7453	205.344	168.449	163.682	152.779	170.008	179.584
ENSG00000165349	SLC7A3	X:70925581-70931125	0.522651	0	0.126678	0.094923	0.355399	0.342627	0.257192
ENSG00000165458	INPPL1	11:72223700-72239105	49.8357	39.6273	45.5849	53.8187	54.5658	39.7629	68.9084
ENSG00000165474	GJB2	13:20187469-20192898	3.89362	0.628257	1.24212	1.03678	0.921216	1.04164	1.04254
ENSG00000165633	VSTM4	10:49014244-49115509	3.45882	1.11664	1.20564	1.37088	1.57719	1.47179	1.00885
ENSG00000165644	COMTD1	10:75233968-75236030	16.5628	15.5487	12.9019	15.9474	11.4489	18.465	12.1373
ENSG00000165732	DDX21	10:68956127-68985073	48.5952	135.92	127.628	104.35	111.021	90.605	107.256
ENSG00000165757	KIAA1462	10:30012799-30115494	2.4748	4.13967	4.73253	4.4153	3.82545	2.42589	3.44779
ENSG00000165895	ARHGAP42	11:100687652-100991937	19.6786	23.6777	21.7506	26.8159	19.9711	11.7669	10.5902
ENSG00000165905	GYLTL1B	11:45921620-45929096	5.70022	7.4835	12.0761	10.6112	12.0499	7.17454	15.1597
ENSG00000166033	HTRA1	10:122461524-122514908	40.3079	13.2381	17.8864	19.8458	20.0678	21.0393	12.9212
ENSG00000166073	GPR176	15:39799022-39920892	3.42452	0.911912	0.89896	1.15522	1.00378	0.896464	0.740969
ENSG00000166166	TRMT61A	14:103529183-103537073	2.08208	5.46221	4.50546	4.32018	4.5678	4.22012	5.25491
ENSG00000166197	NOLC1	10:102152175-102163871	46.7025	96.6979	83.1659	76.4284	75.7087	71.6568	76.8921
ENSG00000166226	CCT2	12:69585333-69601570	49.5875	99.0518	83.3165	78.0501	69.4503	75.8575	78.9181
ENSG00000166396	SERPINB7	18:63752934-63805376	0.093383	0.0980041	0.52596	0.657259	0.573533	0.223819	0.759988
ENSG00000166401	SERPINB8	18:63969924-64005667	0.962929	2.20627	3.43468	1.41853	2.92897	1.96739	3.99378
ENSG00000166436	TRIM66	11:8612036-8671866	0.520984	0.471868	0.442683	0.570454	0.429127	0.253631	1.21376
ENSG00000166446	CDYL2	16:80597905-80804329	0.871851	0.464962	0.51543	0.589736	1.08445	0.373479	1.10823
ENSG00000166448	TMEM130	7:98846487-98870771	2.75965	0.710622	1.04846	1.46609	2.01663	1.90921	1.23621
ENSG00000166562	SEC11C	18:59139476-59158836	19.055	37.7693	33.3066	26.0077	23.854	38.4702	36.2371
ENSG00000166741	NNMT	11:114257786-114313285	42.75	169.547	150.723	108.919	128.579	117.303	127.769
ENSG00000166750	SLFN5	17:35243035-35273655	3.11731	1.69265	1.96098	2.95418	3.22363	1.47281	1.39623
ENSG00000166821	PEX11A	15:89677763-89690783	10.7882	8.24699	6.63267	6.3769	5.61086	9.0043	7.43566
ENSG00000166825	ANPEP	15:89784888-89815401	9.89561	10.3829	13.3842	8.11221	12.5534	11.8676	18.1785
ENSG00000166833	NAV2	11:19350723-20121598	16.8876	6.13673	7.99941	7.15117	6.72682	4.41223	3.39558
ENSG00000166922	SCG5	15:32641675-32697098	0.118051	0.31976	0.0856383	0.372404	0.79998	0.115534	0.297831
ENSG00000167165	UGT1A6	2:233691606-233773300	12.2196	5.6561	5.64004	16.033	11.2816	9.80386	13.5186
ENSG00000167244	IGF2	11:2129111-2141238	56.3656	13.4038	20.3532	14.8234	16.8782	21.6759	21.2587
ENSG00000167286	CD3D	11:118338953-118342744	0	0	0.114518	0.229193	0	0	0.538287
ENSG00000167393	PPP2R3B	X:333962-386955	3.85576	2.79863	2.79567	6.52981	5.52798	2.94742	4.06344
ENSG00000167525	PROCA1	17:28703196-28711854	3.98657	0.919831	2.03907	3.36417	2.99973	2.38683	3.41852
ENSG00000167526	RPL13	16:89560656-89566828	1551.55	1932.14	1719.35	1654.15	1299.59	1909.61	1509.21
ENSG00000167601	AXL	19:41219202-41261766	30.3142	37.1795	42.7928	51.917	38.5461	25.8708	30.0131
ENSG00000167608	TMC4	19:54160107-54173250	38.0478	12.2661	21.8921	25.6131	25.6805	26.9426	33.4299
ENSG00000167615	LENG8	19:54448886-54462037	21.6457	15.698	17.2989	23.8077	22.9441	17.3833	27.4255
ENSG00000167702	KIFC2	8:144466042-144474202	5.51019	2.82218	3.149	6.49798	4.66838	4.62615	5.95579
ENSG00000167721	TSR1	17:2322502-2337507	11.7539	27.7134	24.8626	23.341	21.0093	19.584	21.2327
ENSG00000167747	C19orf48	19:50797703-50804929	30.7179	57.0635	50.1842	48.0342	45.2763	50.6017	56.0117
ENSG00000167774	CTD-2550O8.5	19:8308282-8321379	0.000564074	4.88005	1.10515	3.26589	2.23648	0.000127347	2.51768
ENSG00000167941	SOST	17:43753730-43758788	4.90942	0.63379	1.18194	0.766793	0.765404	1.5358	0.706232
ENSG00000168016	TRANK1	3:36826819-36945057	0.666256	0.14233	0.375403	0.226011	0.996838	0.246668	0.174429
ENSG00000168040	FADD	11:70203162-70207390	9.21621	11.0577	8.24368	9.64866	5.08911	6.57923	4.99255
ENSG00000168209	DDIT4	10:72273919-72276036	10.7314	7.04647	9.5899	16.986	19.3826	14.3903	26.0912
ENSG00000168216	LMBRD1	6:69675801-69797111	21.1309	11.2962	16.1296	17.1837	19.157	16.9456	15.5025
ENSG00000168264	IRF2BP2	1:234604268-234609525	11.6647	11.233	10.1247	13.5857	8.94483	9.57909	11.2684
ENSG00000168298	HIST1H1E	6:26156353-26157107	4.9039	2.99706	2.1938	2.07763	1.36676	3.26735	2.49581
ENSG00000168300	PCMTD1	8:51817574-51899186	26.6015	8.16405	8.99854	12.3158	11.8466	10.6065	13.1267
ENSG00000168389	MFSD2A	1:39955111-39969968	2.92509	3.58875	3.90718	3.70638	6.37303	3.87579	6.38261
ENSG00000168404	MLKL	16:74671854-74700960	4.08534	8.80083	6.13805	6.23395	5.10949	6.4585	6.72961
ENSG00000168405	CMAHP	6:25081067-25166555	0.771766	0.507681	0.294697	0.566554	0.689009	0.177312	0.948838
ENSG00000168646	AXIN2	17:65528562-65561647	6.10023	1.16797	1.35277	1.50486	1.0249	2.69059	0.945259
ENSG00000168675	LDLRAD4	18:13217497-13652755	1.66426	0.279229	0.697353	1.29732	0.753864	0.235807	0.551187
ENSG00000168685	IL7R	5:35852694-35879603	2.42183	8.80413	12.2202	16.5217	14.7049	7.6105	10.7676
ENSG00000168913	ENHO	9:34521039-34523041	2.40139	0.872551	0.946546	0.727656	0.998199	1.86733	0.738361
ENSG00000168928	CTRB2	16:75204095-75207185	1.6066	0.44021	0.977714	0.667033	0.733742	0.876625	0.56572
ENSG00000169047	IRS1	2:226731316-226799759	5.64579	11.3244	12.3196	9.78061	10.1172	8.21298	7.23048
ENSG00000169067	ACTBL2	5:57480015-57482809	1.72017	1.27519	1.59146	1.81354	1.79798	0.790285	1.11057
ENSG00000169116	PARM1	4:74933094-75050115	17.0158	5.974	7.22158	7.77769	6.47248	5.99813	4.63296
ENSG00000169126	ARMC4	10:27812163-27999048	0.597505	1.04073	0.364731	1.12105	0.647858	0.384896	0.279039
ENSG00000169242	EFNA1	1:155127459-155134857	18.3254	13.8073	20.9014	19.7154	22.0514	22.5684	28.6772
ENSG00000169252	ADRB2	5:148825244-148828687	0.568337	0.742179	0.905416	0.874707	0.781449	0.41721	0.861873
ENSG00000169418	NPR1	1:153678636-153693992	1.79267	0.558587	0.920234	1.66021	1.29722	1.06084	1.03925
ENSG00000169429	CXCL8	4:73740505-73743716	0.570142	0.353616	0.435744	0.427545	0.906735	0.318043	0.839394
ENSG00000169554	ZEB2	2:144384080-144524583	0.239776	0.293056	0.224863	0.482594	0.372993	0.200655	0.482473
ENSG00000169583	CLIC3	9:136994634-136996803	37.1041	19.7845	21.2963	20.0078	18.2535	29.5112	14.191
ENSG00000169715	MT1E	16:56625474-56627112	144.608	405.846	383.87	294.384	238.182	328.71	345.895
ENSG00000169750	RAC3	17:82031623-82034204	44.0198	90.119	74.987	66.3823	54.4346	81.6516	71.8771
ENSG00000169856	ONECUT1	15:52756988-52791078	0.991522	2.08741	1.28008	0.420398	0.360944	0.335583	0.446877
ENSG00000169908	TM4SF1	3:149369021-149377865	11.0637	23.733	31.3805	35.8783	40.4784	31.0944	50.1488
ENSG00000169918	OTUD7A	15:31475397-31870789	1.3206	1.49141	1.80833	0.856076	1.60604	1.75744	1.1365
ENSG00000170271	FAXDC2	5:154818490-154859252	1.28195	0.312444	0.399818	0.409062	0.695092	0.690978	0.552313
ENSG00000170345	FOS	14:75278773-75282230	239.095	22.7956	42.5837	19.5347	38.8172	15.3144	40.7364
ENSG00000170370	EMX2	10:117542443-117549546	0.826566	0.373631	0.369526	1.00187	0.724551	0.35951	0.629701
ENSG00000170381	SEMA3E	7:83363905-83649010	1.49412	0.925961	1.50665	1.30996	2.50832	0.878139	0.750847
ENSG00000170412	GPRC5C	17:74424850-74451653	9.28045	2.11529	6.13497	5.17201	7.29142	10.6727	7.88003
ENSG00000170558	CDH2	18:27950965-28177446	16.0456	10.4223	15.1618	14.9668	14.4478	10.0906	9.07311
ENSG00000170703	TTLL6	17:48762234-48817214	0.624615	0.0995918	0.195827	0.137351	0.33063	0.276189	0.416457
ENSG00000170915	PAQR8	6:52361420-52407777	4.51945	1.65178	1.86256	2.07121	2.05062	2.13821	1.69742
ENSG00000170989	S1PR1	1:101236887-101241518	1.14359	1.11018	1.75028	2.38286	1.79609	0.821262	0.676802
ENSG00000171105	INSR	19:7112254-7294034	5.89072	1.77935	2.20287	2.95453	3.37136	2.39607	3.04319
ENSG00000171135	JAGN1	3:9890553-9894349	31.3815	33.9972	31.5639	29.005	28.9567	41.1717	35.7209
ENSG00000171159	C9orf16	9:128160259-128163928	102.453	72.6023	55.1953	74.4367	70.2279	73.0806	49.1747
ENSG00000171204	TMEM126B	11:85628572-85636539	52.3214	101.593	71.2011	68.9998	72.6548	69.3771	77.8102
ENSG00000171206	TRIM8	10:102644495-102658407	9.05513	15.1117	15.0807	16.4379	14.2604	10.4779	16.1934
ENSG00000171222	SCAND1	20:35953616-35959472	18.82	12.4669	12.8814	12.1774	9.40543	17.0543	9.61882
ENSG00000171303	KCNK3	2:26692689-26733420	0.4201	0.320104	0.27518	0.626353	0.667661	0.459065	0.461976
ENSG00000171316	CHD7	8:60678777-60868028	6.4577	8.22976	9.10161	7.04547	5.25823	5.01811	9.49317
ENSG00000171345	KRT19	17:41523616-41528308	1164.56	1001.58	980.217	929.691	758.37	1067.15	902.336
ENSG00000171346	KRT15	17:41513742-41522529	102.323	22.7479	29.4446	28.2555	24.876	43.7218	22.897
ENSG00000171388	APLN	X:129645258-129654937	0.272555	0.572026	0.461652	0.514832	0.267686	0.275905	0.726541
ENSG00000171401	KRT13	17:41500980-41505705	11.1812	6.81342	7.65742	14.995	15.8918	16.1413	7.80516
ENSG00000171522	PTGER4	5:40679497-40693735	2.89738	3.27933	3.10429	3.18168	3.3529	1.96271	2.13149
ENSG00000171604	CXXC5	5:139647298-139683882	13.9696	10.3317	9.40822	11.2794	7.22402	10.5881	7.12252
ENSG00000171793	CTPS1	1:40979334-41012565	23.1367	54.5937	48.9396	51.3728	43.4914	40.6009	41.4781
ENSG00000171813	PWWP2B	10:132397167-132417863	8.5236	9.01093	9.06343	10.2244	6.92532	9.35794	7.81965
ENSG00000171916	LGALS9C	17:18476736-18494945	0.0259175	0.329546	0.211914	0.13995	0.611819	0.1234	0.865386
ENSG00000171962	DRC3	17:17972812-18016889	0.678412	0.244283	0.770112	0.381592	1.48416	0.766857	0.830964
ENSG00000172139	SLC9C1	3:112140886-112294258	0.683862	0.205925	0.114588	0.0254395	0.760576	0.137791	0.0689233
ENSG00000172348	RCAN2	6:46220735-46491972	3.2867	0.920849	0.969906	0.720985	0.912723	0.961753	0.660735
ENSG00000172379	ARNT2	15:80404349-80597937	0.311648	0.831171	0.49837	0.522894	0.506265	0.55867	1.5258
ENSG00000172478	C2orf54	2:240886047-240896889	36.1339	15.4145	22.0454	14.915	10.8771	19.1974	9.86095
ENSG00000172746	RPL12P13	1:26980164-26980975	0.272572	0.0713404	0.053335	0.10518	0.0147601	0.450013	0.257689
ENSG00000172782	FADS6	17:74877298-74893781	0.858273	0.231204	0.285332	0.148758	0.205608	0.824122	0.446145
ENSG00000172817	CYP7B1	8:64587762-64798761	1.6733	1.2008	1.68948	0.739912	0.642215	1.08449	1.39332
ENSG00000172927	MYEOV	11:69294137-69367726	24.3025	62.4974	55.2005	75.7896	60.8153	55.6689	59.1462
ENSG00000172965	MIR4435-2HG	2:111196349-111495100	41.0184	100.78	89.8769	80.2041	92.7165	75.3444	94.3701
ENSG00000173145	NOC3L	10:94333225-94362959	10.6887	19.4136	20.2641	16.0583	14.4626	14.1275	15.3149
ENSG00000173212	MAB21L3	1:116111754-116135240	1.55818	1.68359	1.62963	0.909792	1.39468	1.29035	1.40003
ENSG00000173295	FAM86B3P	8:8228594-8244865	0.936833	0.791121	0.685935	0.524749	1.94606	0.592182	1.78864
ENSG00000173334	TRIB1	8:125430320-125438405	5.77926	8.37959	8.89379	8.1139	7.20682	6.83691	10.5262
ENSG00000173391	OLR1	12:10158300-10172138	135.709	107.658	161.784	178.787	145.954	117.568	101.513
ENSG00000173432	SAA1	11:18266173-18269977	0.486576	0.306589	0.998341	4.83864	1.7221	1.70491	1.8661
ENSG00000173457	PPP1R14B	11:64244479-64246941	48.1514	157.456	136.251	123.167	111.48	128.032	141.304
ENSG00000173535	TNFRSF10C	8:23084354-23117437	8.94989	2.7597	2.82582	3.92416	4.0021	3.44917	2.73281
ENSG00000173559	NABP1	2:191678067-191696659	10.225	25.6521	22.1	23.7021	23.9462	19.7834	24.78
ENSG00000173705	SUSD5	3:33150041-33219215	1.04454	0.831888	1.56448	1.40871	1.31436	0.872203	0.618114
ENSG00000173838	2016-03-10	17:62701313-62808344	0.795198	0.550074	0.0579945	0.520547	0.260062	0.32957	0.489693
ENSG00000173926	2016-03-03	5:126867713-127030808	2.03477	3.24909	1.36855	2.98509	2.20384	0.903067	2.23912
ENSG00000173947	PIFO	1:111346287-111353013	1.76691	0.618176	0.585742	0.260698	1.06449	0.431232	0.359626
ENSG00000174015	SPERT	13:45702310-45714559	0.945294	0.83163	0.197266	0.4435	0.219091	0.223321	0.366922
ENSG00000174125	TLR1	4:38790676-38856817	1.45704	0.636719	0.748808	1.95102	2.07092	0.889885	1.14304
ENSG00000174371	EXO1	1:241847966-241895148	11.6459	25.1328	19.1328	18.2802	17.528	14.9099	17.4094
ENSG00000174428	GTF2IRD2B	7:75092572-75149817	6.44913	8.78515	5.77854	6.82516	6.55575	4.54342	5.94221
ENSG00000174460	ZCCHC12	X:118823789-118826968	4.22971	0.697529	0.491963	0.253687	0.751761	1.09427	0.472444
ENSG00000174498	IGDCC3	15:65327126-65378040	1.09023	0.200988	0.576321	0.557551	0.404427	0.34711	0.443179
ENSG00000174938	SEZ6L2	16:29871158-29899547	22.0303	9.57794	12.8924	16.6433	17.0297	13.7169	15.718
ENSG00000175003	SLC22A1	6:160121788-160158718	0.48593	0.31388	0.23798	0.0920244	0.852221	0.138858	1.00857
ENSG00000175066	GK5	3:142157526-142225607	5.59716	6.44698	3.68521	7.86315	6.14129	3.6338	5.92086
ENSG00000175097	RAG2	11:36575573-36598279	0.48891	0	0.0965002	0	0.0183677	0.129637	0
ENSG00000175121	WFDC5	20:45109451-45115172	0.497641	0	0.274634	0.392065	0.342269	0.0529243	0.106083
ENSG00000175155	YPEL2	17:59331688-59401729	0.490194	0.135093	0.115841	0.814899	0.304987	0.165444	0.165524
ENSG00000175265	GOLGA8A	15:34379067-34437466	13.1224	8.96606	13.1495	16.344	15.8609	12.0267	23.317
ENSG00000175315	CST6	11:66011840-66013505	28.6555	47.5289	56.7628	59.0312	28.8045	35.0073	34.4782
ENSG00000175356	SCUBE2	11:9020390-9138114	0.268648	0.25116	0.117732	0	0.443021	0	0.0247713
ENSG00000175550	DRAP1	11:65919256-65921561	56.5891	117.239	108.771	119.934	108.798	102.156	124.595
ENSG00000175592	FOSL1	11:65892048-65900573	7.40036	25.2103	22.1143	24.9244	23.4566	13.4935	31.2633
ENSG00000175602	CCDC85B	11:65890111-65891635	12.3985	21.2671	16.8199	15.5437	6.12004	14.0228	6.77328
ENSG00000175906	ARL4D	17:43398958-43401137	6.97192	7.46899	6.63415	6.01374	9.43457	9.05693	8.91311
ENSG00000176092	AIM1L	1:26321858-26354130	7.83679	11.304	12.0896	13.2459	15.8817	9.36293	17.3914
ENSG00000176244	ACBD7	10:15077522-15088776	15.7839	5.34943	5.66164	5.4031	6.56879	5.57398	3.41105
ENSG00000176697	BDNF	11:27654892-27722058	1.74316	6.20797	5.33401	3.99751	4.02517	3.5277	3.06596
ENSG00000177000	MTHFR	1:11785722-11806920	17.7227	6.42741	6.10327	6.86162	7.10568	5.71409	4.96248
ENSG00000177169	ULK1	12:131894650-131923167	15.8638	5.59565	6.10045	10.3749	10.9589	10.4688	12.1926
ENSG00000177494	ZBED2	3:111592899-111595443	2.63576	5.47109	6.05458	7.23141	4.72085	3.90216	4.31871
ENSG00000177606	JUN	1:58780787-58784327	41.6719	10.8743	19.8634	14.0142	14.1642	9.38321	16.5287
ENSG00000177791	MYOZ1	10:73631653-73641757	4.14162	0.831002	1.05598	2.30212	2.06413	1.75104	1.26615
ENSG00000177854	TMEM187	X:153972326-153983195	8.43917	2.86404	2.64635	4.82009	3.63296	5.62071	2.4386
ENSG00000177855	CACYBPP2	2:183607441-183608119	2.45536	4.35634	2.72759	2.87169	2.23316	3.37299	1.56366
ENSG00000178038	ALS2CL	3:46668996-46693704	22.4838	14.6655	16.0251	22.1353	21.2076	16.9012	27.9731
ENSG00000178125	PPP1R42	8:66964098-67056604	3.80722e-184	3.32012e-109	1.19206e-106	0.591247	1.01807	0.188337	2.18002e-228
ENSG00000178172	SPINK6	5:148202793-148215137	0.310748	16.0846	8.07091	1.25854	3.34313	1.47629	4.10897
ENSG00000178202	KDELC2	11:108472104-108498432	22.8657	16.3608	17.4598	21.432	14.6532	15.6165	11.4005
ENSG00000178401	DNAJC22	12:49346916-49357546	7.90354	2.69562	3.26168	4.02675	5.35398	5.06098	4.73505
ENSG00000178502	KLHL11	17:41853544-41865431	2.73653	3.28485	3.08647	2.8033	2.68781	1.4976	1.9185
ENSG00000178662	CSRNP3	2:165469646-165689407	2.06656	0.21936	1.01738	1.51765	1.71275	1.11275	1.1197
ENSG00000178741	COX5A	15:74919790-74938168	231.47	311.524	277.154	268.784	219.99	300.923	239.485
ENSG00000178796	RIIAD1	1:151710432-151729805	0.166701	0	0.136442	0	1.0846	0.576813	0
ENSG00000178921	PFAS	17:8247617-8270491	6.17006	8.93848	11.4209	14.3717	8.10662	7.65897	12.36
ENSG00000178934	LGALS7B	19:38789210-38791749	1.0619	0.446197	1.1536	0.22371	0.765852	1.32512	0.979792
ENSG00000178947	SMIM10L2A	X:135421942-135428074	0.852907	0.145362	0.276017	0.29497	0.357455	0.32714	0.2433
ENSG00000178977	LINC00324	17:8220641-8224043	2.06439	0.501711	0.342445	0.581641	0.853769	0.694417	0.324358
ENSG00000179041	RRS1	8:66429027-66430733	4.15112	30.4937	24.8226	19.3973	19.3486	20.688	25.194
ENSG00000179115	FARSA	19:12922478-12934037	23.2193	41.9871	34.8139	34.3034	31.0324	36.3008	39.025
ENSG00000179242	CDH4	20:61252425-61940617	0.81181	0.906365	0.961748	1.0374	1.00134	0.491492	0.831043
ENSG00000179431	FJX1	11:35618418-35620868	6.33857	9.93665	13.0282	10.3139	5.66798	6.79051	6.84682
ENSG00000179674	ARL14	3:160677158-160678452	1.11859	0.900126	1.52822	1.29218	2.78391	1.50827	3.1798
ENSG00000179743	FLJ37453	1:15834473-15848147	1.40427	0.642366	0.964551	0.87863	0.919502	0.920656	0.940583
ENSG00000179750	APOBEC3B	22:38982346-38992804	13.1884	8.42293	12.3751	24.0268	20.9159	13.9441	16.615
ENSG00000179776	CDH5	16:66366621-66404786	0.160632	0.826154	1.25353	1.90575	0.773496	0.855505	1.60358
ENSG00000179958	DCTPP1	16:30423618-30430075	15.3195	33.8306	24.8567	25.8198	23.2119	26.7678	28.3032
ENSG00000180209	MYLPF	16:30370933-30377991	0.366536	0.890529	0.670174	0.447622	1.78979	0	1.1128
ENSG00000180422	LINC00304	16:89159145-89164245	1.19089	0.345915	0.802803	1.11585	1.14079	0.927966	1.2002
ENSG00000180530	NRIP1	21:14961234-15065000	9.44573	13.7666	14.7441	13.615	12.1696	7.72826	8.45752
ENSG00000180573	HIST1H2AC	6:26124144-26139116	11.0583	12.5447	11.2665	9.23131	13.3258	11.2611	13.7108
ENSG00000181035	SLC25A42	19:19063998-19112888	7.36955	2.48949	2.92199	3.73203	3.58241	5.64334	5.16714
ENSG00000181085	MAPK15	8:143716258-143722458	11.3321	5.29179	6.22702	7.16434	6.42864	5.0908	10.8408
ENSG00000181222	POLR2A	17:7484365-7514618	22.5657	27.7164	27.0463	26.7146	32.5817	21.663	30.6006
ENSG00000181472	ZBTB2	6:151364116-151391548	6.09257	12.4895	11.341	9.25588	9.44879	8.15263	8.86816
ENSG00000181588	MEX3D	19:1554668-1568058	11.2999	11.7256	9.44847	9.24475	6.31691	8.93641	7.92043
ENSG00000181649	PHLDA2	11:2928272-2929455	3.66382	8.65378	7.39182	6.36879	7.51775	4.92902	9.18816
ENSG00000181744	C3orf58	3:143971797-144048719	2.12895	1.79822	2.91017	2.42439	2.39241	3.39368	2.78275
ENSG00000181804	SLC9A9	3:143265221-143848531	2.07566	1.17225	1.0776	1.05406	2.06541	0.673958	0.590856
ENSG00000181982	CCDC149	4:24806116-24980204	1.56066	0.919911	0.983904	2.35131	1.10756	0.741463	1.42437
ENSG00000182154	MRPL41	9:137551198-137552555	15.7068	19.9122	15.6493	19.1167	11.1297	14.5933	11.6261
ENSG00000182179	UBA7	3:49805206-49813946	3.56434	0.992091	1.18302	2.67407	2.0141	0.755864	1.54548
ENSG00000182220	ATP6AP2	X:40580907-40606637	85.2282	44.9666	66.5528	68.477	67.4518	70.9033	64.47
ENSG00000182261	NLRP10	11:7959423-7965426	0.0570905	0.299562	0.877589	0.209722	0.39252	0.0202733	0.243518
ENSG00000182307	C8orf33	8:145052377-145056030	13.7539	26.1149	21.6384	18.5352	18.0838	17.5867	16.3262
ENSG00000182310	SPACA6	19:51693339-51712387	10.0851	5.5041	5.36048	8.405	5.58214	11.3075	6.34956
ENSG00000182632	CCNYL2	10:42409726-42454385	1.1522	0.760135	0.72646	0.725902	0.485089	0.280398	0.877363
ENSG00000182700	IGIP	5:140125934-140129392	1.70975	0.699192	1.19837	1.14772	1.16061	1.60759	1.52816
ENSG00000182866	LCK	1:32251238-32286165	0.338287	0.0677845	0.088317	0.135627	0.219169	0.160561	0.644802
ENSG00000182898	TCHHL1	1:152084143-152089064	0.782409	0.581037	0.86292	0.663128	1.5723	0.820941	0.847106
ENSG00000182985	CADM1	11:115169217-115504957	1.19351	0.235566	0.551708	0.480787	0.855122	0.723251	0.162934
ENSG00000183111	ARHGEF37	5:149551946-149634968	1.04011	0.96225	0.717912	1.98998	1.18626	1.31153	1.36736
ENSG00000183317	EPHA10	1:37713879-37765133	1.79846	1.73142	1.58874	3.0826	2.3519	1.0663	1.82712
ENSG00000183484	GPR132	14:105049388-105065445	0.861088	0.0547321	0.0695644	0.183798	0.418705	0.143869	0.342531
ENSG00000183579	ZNRF3	22:28883591-29057487	7.84615	1.04807	1.52907	1.42945	0.978266	1.45861	0.893801
ENSG00000183655	KLHL25	15:85759322-85795030	1.78781	2.1285	1.54671	1.8129	1.43727	2.67625	2.09252
ENSG00000183668	PSG9	19:43211790-43269530	1.00179	0.28051	0.511932	1.67985	1.19588	0.78558	0.669962
ENSG00000183671	GPR1	2:206175315-206218047	4.05929	2.01679	2.97569	3.39764	4.56347	2.48368	3.04081
ENSG00000183696	UPP1	7:48088627-48108733	31.5401	78.6884	71.6529	89.9484	100.428	67.2841	103.783
ENSG00000183760	ACP7	19:39083912-39111493	3.59564	2.32151	4.46322	5.59145	4.83827	3.93584	4.00456
ENSG00000183770	FOXL2	3:138944223-138947140	1.31098	0.980402	0.949731	1.16231	0.62159	0.867011	0.530211
ENSG00000183779	ZNF703	8:37695750-37700021	37.0083	12.5016	11.7522	10.0927	7.72796	13.9838	7.79373
ENSG00000183856	IQGAP3	1:156525404-156572604	15.1783	11.0438	12.239	14.5469	17.1175	11.6913	18.6623
ENSG00000183889	AC138969.4	16:16317443-16350590	33.4344	23.9068	26.4083	30.0552	35.3911	25.4272	36.3644
ENSG00000184012	TMPRSS2	21:41464550-41531116	4.46658	1.08359	1.55809	1.54545	1.41129	1.43899	0.960907
ENSG00000184144	CNTN2	1:205043196-205078499	0.532524	0.397817	0.189742	0.382178	0.887322	0.148942	0.128154
ENSG00000184178	SCFD2	4:52872981-53366075	4.03954	7.87918	6.87819	7.52287	5.28198	5.64574	5.71779
ENSG00000184205	TSPYL2	X:53082366-53088540	6.84082	7.05825	6.43397	7.58531	10.89	7.2833	9.63582
ENSG00000184206	GOLGA6L4	15:84235772-84245368	2.12208	1.39163	1.94162	2.02426	3.07174	1.74478	3.51016
ENSG00000184216	IRAK1	X:154010499-154019980	58.8983	119.9	97.4531	91.9316	74.7943	81.3263	85.707
ENSG00000184271	POU6F1	12:51186935-51217693	1.1419	2.87428	0.861802	1.06049	1.3432	1.05328	1.17408
ENSG00000184292	TACSTD2	1:58575422-58577773	163.089	75.1152	114.035	129.159	117.776	108.351	101.363
ENSG00000184347	SLIT3	5:168661732-169301129	7.58752	2.09559	2.75767	3.53679	2.79335	1.90603	2.40645
ENSG00000184454	NCMAP	1:24556110-24609328	1.2015	0.21765	0.223589	0.163225	0.445286	0.247215	0.258992
ENSG00000184481	FOXO4	X:71096196-71103535	5.10598	1.44477	1.33176	1.89178	2.09702	2.51907	1.59795
ENSG00000184500	PROS1	3:93873032-93974066	5.83507	2.74794	3.06444	4.67739	5.09121	2.80257	3.37503
ENSG00000184557	SOCS3	17:78356777-78360077	18.3994	25.4959	23.8885	15.2071	16.4688	14.3027	18.9464
ENSG00000184599	FAM19A3	1:112720418-112727235	4.48158	0.878161	1.62868	1.72412	1.78577	1.78269	1.52539
ENSG00000184613	NELL2	12:44508274-44921848	2.21658	1.38568	1.45013	3.02624	2.75947	2.41211	1.98472
ENSG00000184828	ZBTB7C	18:48026672-48410752	1.14608	0.333922	0.270444	0.153636	0.646785	1.10087	0.504461
ENSG00000184838	PRR16	5:120464277-120687332	1.00782	1.3513	1.42865	1.19413	1.26855	0.524356	0.476189
ENSG00000184898	RBM43	2:151247939-151261879	2.53016	0.958578	1.5658	1.42545	1.51131	1.12668	1.14213
ENSG00000184903	IMMP2L	7:110663050-111562517	12.8881	28.5576	18.4292	20.8585	22.9801	9.98045	17.2734
ENSG00000184985	SORCS2	4:7192537-7742836	23.8935	9.54943	9.14968	15.7636	7.97827	8.87134	4.86025
ENSG00000185022	MAFF	22:38200766-38216511	5.53252	8.22925	7.76573	7.92091	11.7979	6.74354	13.0358
ENSG00000185130	HIST1H2BL	6:27807443-27807931	0.556772	3.94783	1.56643	1.75944	1.09511	2.06526	1.33375
ENSG00000185163	DDX51	12:132136593-132144335	3.77526	5.87191	7.86702	6.46909	8.06942	6.65753	12.1387
ENSG00000185269	NOTUM	17:81952506-81961840	4.27903	1.43911	2.11866	2.22857	1.2269	2.16157	1.1884
ENSG00000185418	TARSL2	15:101653597-101724604	7.25862	9.77514	9.40693	10.0612	6.67608	7.75605	7.46375
ENSG00000185432	METTL7A	12:50923471-50932517	12.5263	2.61966	2.51423	3.17141	4.296	5.21658	3.19047
ENSG00000185442	FAM174B	15:92617442-92809884	0.726813	0.468368	1.50315	1.68456	1.42271	1.20536	1.00009
ENSG00000185495	RP11-504P24.3	1:223992742-224010612	2.17948	1.12102	2.44023	2.3516	3.12283	3.12508	3.77662
ENSG00000185630	PBX1	1:164555583-164851831	11.0686	4.75897	4.4486	3.79781	6.59447	8.96516	4.89006
ENSG00000185630	PBX1	1:164651895-164899296	0.314153	0	0	0.40408	0	0.0621561	0.0125113
ENSG00000185650	ZFP36L1	14:68787659-68796253	25.3668	36.2974	42.4139	48.799	46.295	29.1486	41.9549
ENSG00000185664	PMEL	12:55954104-55973317	41.6111	6.9148	12.2412	15.5854	16.3126	16.2341	13.6216
ENSG00000185730	ZNF696	8:143289675-143298061	3.73182	3.4651	3.29261	3.93182	2.14574	3.28957	2.40389
ENSG00000185818	NAT8L	4:2059511-2069089	2.54462	2.13807	3.12609	3.48303	2.80322	2.46464	2.85646
ENSG00000185834	RPL12P4	20:55074643-55075140	2.72331	2.68565	2.75577	3.00194	2.038	2.17302	2.32759
ENSG00000185864	NPIPB4	16:21834568-21880827	19.3449	24.806	28.7543	29.9255	39.6793	26.3632	54.2981
ENSG00000185880	TRIM69	15:44728987-44767829	6.79613	7.44528	4.10639	4.49947	6.45323	8.04049	4.62753
ENSG00000186081	KRT5	12:52514574-52520687	3.37663	4.01726	6.55362	6.47463	6.06783	12.9595	12.5291
ENSG00000186204	CYP4F12	19:15672756-15697174	1.23197	0.162319	0.195309	0.370975	0.352852	0.177991	0.337725
ENSG00000186212	SOWAHB	4:76894927-76898147	2.07471	1.7218	1.34604	2.30526	1.91779	1.37269	1.4748
ENSG00000186642	PDE2A	11:72576140-72674591	4.96858	1.73382	2.67462	3.57862	1.908	2.15005	2.18346
ENSG00000186777	ZNF732	4:270674-305321	1.4538	2.10364	2.13464	1.1633	1.44138	1.21525	1.18167
ENSG00000186897	C1QL4	12:49332410-49337188	6.14201	1.58277	2.25616	2.27137	2.91982	2.53782	2.42363
ENSG00000186952	TMEM232	5:110289232-110738956	1.15938	0.0734502	0.194761	0.734843	0.0485422	0.888974	0.49565
ENSG00000186998	EMID1	22:29205850-29259597	13.7523	3.34481	4.90374	6.22582	5.84454	5.75743	4.29021
ENSG00000187045	TMPRSS6	22:37065435-37109563	3.45827	0.909954	1.74883	2.212	2.36686	2.14644	2.68283
ENSG00000187098	MITF	3:69739434-69968337	2.58925	3.76856	3.0986	3.08314	3.82117	2.06857	2.36519
ENSG00000187554	TLR5	1:223109405-223143282	3.07751	0.352724	0.51942	0.889153	1.58428	0.633667	0.592936
ENSG00000187556	NANOS3	19:13862062-13880757	0	0.178067	0	0.76926	0	0.179382	0.517818
ENSG00000187605	TET3	2:73986403-74108176	4.49407	3.0249	3.09268	2.83852	3.61283	2.32982	2.76414
ENSG00000187634	SAMD11	1:924879-944581	14.272	1.76619	2.32218	1.27818	2.459	3.72156	1.17457
ENSG00000187678	SPRY4	5:142310426-142326455	1.35301	1.48231	1.38097	1.45198	2.74488	1.58592	2.25988
ENSG00000187688	TRPV2	17:16415541-16437003	0.274298	0.15398	0.480961	0.0988395	0.476895	0.0836231	0.314702
ENSG00000187736	NHEJ1	2:219075316-219160865	4.47605	9.29337	8.1503	5.68315	6.47277	8.62536	5.70186
ENSG00000187867	PALM3	19:14053364-14059159	4.10681	1.62402	2.4546	2.71749	2.97333	3.52216	1.79801
ENSG00000187905	LRRC74B	22:21045959-21064168	0.623198	0.128884	0.247332	0.241116	0.655313	0.335185	0.403254
ENSG00000187957	DNER	2:229357628-229714558	0.130181	0.988504	0.550192	0.557603	0.479234	0.409535	1.16503
ENSG00000187994	RINL	19:38867833-38878279	2.38005	2.85969	2.86269	1.51912	3.20319	1.69756	2.04292
ENSG00000188153	COL4A5	X:108439843-108697545	16.6213	7.08938	8.14597	13.0707	9.73383	8.21359	10.4248
ENSG00000188162	OTOG	11:17547372-17647150	2.21723	0.144655	1.61942	0.221677	0.291567	0.332581	1.29597
ENSG00000188176	SMTNL2	17:4583998-4608319	1.2808	0.199674	0.853355	0.375134	0.596904	0.855405	0.228336
ENSG00000188211	NCR3LG1	11:17351725-17377341	0.972729	1.38459	1.32305	1.1347	1.23282	0.651527	0.813019
ENSG00000188282	RUFY4	2:218034959-218090581	1.04112	0.157838	0.553451	0.986312	0.221561	0.208853	0.0202708
ENSG00000188290	HES4	1:998961-1000172	25.1188	18.1112	14.9395	19.8451	9.89147	15.0673	9.41659
ENSG00000188452	CERKL	2:181536675-181680665	3.65196	4.54814	7.02514	4.99319	3.74903	4.67674	4.57265
ENSG00000188483	IER5L	9:129175551-129178262	7.48243	9.99044	8.88755	7.33943	4.48305	7.03424	4.79725
ENSG00000188488	SERPINA5	14:94561441-94593120	2.57128	0.1423	0.33657	0.627039	0.787139	0.632346	0.79869
ENSG00000188508	KRTDAP	19:35487323-35495558	1.4062	0.295431	0.444216	0.222051	0.549486	0.596083	0
ENSG00000188517	COL25A1	4:108810720-109302657	0.779928	0.125022	0.172519	0.29654	0.214826	0.165138	0.141933
ENSG00000188549	C15orf52	15:40331451-40340967	8.82043	12.1628	12.0442	18.76	13.268	7.1521	16.7713
ENSG00000188566	NDOR1	9:137205669-137217009	4.95608	5.15205	4.65946	4.98869	5.55893	3.81294	6.64249
ENSG00000188603	CLN3	16:28477278-28495575	18.718	14.2954	19.9287	16.7103	24.9964	22.7071	23.2285
ENSG00000188690	UROS	10:125784979-125823248	37.0191	35.2525	29.904	27.2724	24.5725	35.2038	28.346
ENSG00000188738	FSIP2	2:185738627-185833290	5.01047	5.48079	6.27574	4.25893	5.86444	5.05196	5.68766
ENSG00000188886	ASTL	2:96123849-96138436	0.49892	0	0.0293355	0.0586286	0.036564	0.198097	0.0396754
ENSG00000189001	SBSN	19:35523366-35528351	0.0468597	0.357252	0.412179	0.268713	0.584985	0.224604	0.724426
ENSG00000189283	FHIT	3:59749309-61251459	1.09683	0.533172	0.229949	1.55729	0.574597	0.12125	1.16794
ENSG00000189367	KIAA0408	6:127440342-127459391	0.167152	0.113011	0.359496	0.401838	1.44873	0.53418	0.633047
ENSG00000196074	SYCP2	20:59863562-59933655	2.99799	1.20081	2.36355	2.37439	3.37755	3.18204	2.75371
ENSG00000196141	SPATS2L	2:200305880-200482263	38.0645	71.8687	62.0201	64.7903	58.7732	46.9718	55.2035
ENSG00000196154	S100A4	1:153543612-153550136	39.4581	37.6462	29.8419	30.0723	34.0306	58.5276	49.9741
ENSG00000196167	COLCA1	11:111290786-111305045	0.0577611	0.209635	0.139782	0.301501	0.994098	0.186543	0.0631988
ENSG00000196337	CGB7	19:49054274-49058860	1.67929	0.616655	0.690464	0.614165	1.7154	0.586449	0.93238
ENSG00000196352	CD55	1:207321507-207386804	19.6902	37.3509	40.0496	46.7336	57.4117	29.881	38.0026
ENSG00000196369	SRGAP2B	1:144887264-145095528	9.21657	8.95887	5.90109	8.71241	6.11047	5.39434	5.49408
ENSG00000196569	LAMA2	6:128883140-129516569	0.936799	0.163887	0.651839	0.33436	0.547611	0.305674	0.636259
ENSG00000196611	MMP1	11:102789919-102798160	0.184802	1.30911	1.49257	0.836567	1.33871	1.10722	4.65479
ENSG00000196739	COL27A1	9:114155559-114312511	3.06479	3.68024	4.23158	4.92181	4.84298	4.01917	8.422
ENSG00000196743	GM2A	5:151212149-151270440	23.9057	8.89819	11.605	11.6929	11.723	12.9461	11.3791
ENSG00000196747	HIST1H2AI	6:27808198-27808701	1.12599	1.60021	0.784531	1.04635	0.586221	1.26392	0.705266
ENSG00000196756	SNHG17	20:38420587-38435353	12.6364	36.7981	32.1081	30.723	37.7716	32.2567	41.9843
ENSG00000196878	LAMB3	1:209614869-209652466	47.9946	47.9418	75.7047	103.184	86.2529	73.6166	119.688
ENSG00000196911	KPNA5	6:116681186-116741866	3.12432	3.13448	2.48388	1.68835	3.32129	1.75131	2.14783
ENSG00000197043	ANXA6	5:151100711-151157882	46.9381	28.238	29.2984	27.5425	27.5627	35.7616	22.333
ENSG00000197261	C6orf141	6:49550645-49561907	2.46762	3.74365	3.51976	3.78714	5.03076	4.17512	11.2194
ENSG00000197345	MRPL21	11:68891275-68903835	61.9734	123.2	110.363	102.316	108.768	128.164	123.72
ENSG00000197353	LYPD2	8:142750149-142752534	0	0	0	0	0	0.434864	0.109097
ENSG00000197444	OGDHL	10:49734642-49762379	17.8474	6.26895	6.83208	7.82832	8.06193	7.4508	6.65506
ENSG00000197467	COL13A1	10:69801930-69964275	0.743816	0.223483	0.551741	0.614891	0.864534	0.232588	0.730122
ENSG00000197496	SLC2A10	20:46709486-46736347	7.38969	2.06442	2.84918	2.34022	2.91886	2.87184	2.51543
ENSG00000197498	RPF2	6:110982014-111028263	12.3369	32.108	29.442	24.7646	26.7104	29.3161	33.766
ENSG00000197530	MIB2	1:1615414-1630610	39.5283	61.2405	48.5575	53.6101	28.9124	47.4954	33.8998
ENSG00000197558	SSPO	7:149776041-149833979	1.15664	0.192059	0.228845	0.204962	0.3535	0.280937	0.250298
ENSG00000197563	PIGN	18:62043566-62187118	7.9965	4.59183	4.15318	6.81867	4.87585	5.36541	2.65308
ENSG00000197565	COL4A6	X:108155606-108439497	2.95139	0.973569	1.7425	1.91064	1.49423	1.58455	1.93431
ENSG00000197582	GPX1P1	X:13378734-13379340	2.32018	2.85431	2.35419	2.74639	0.733172	1.21405	2.20686
ENSG00000197614	MFAP5	12:8637345-8662888	2.51569	1.78529	3.67893	10.1893	12.9288	8.02758	9.37883
ENSG00000197646	PDCD1LG2	9:5510569-5571254	0.0755949	0.198328	0.193573	0.624817	0.464057	0.1812	0.443299
ENSG00000197728	RPS26	12:56041852-56044675	222.351	672	550.966	443.895	437.719	549.738	593.618
ENSG00000197785	ATAD3A	1:1512150-1534687	16.9034	31.5702	26.0559	25.5836	24.0192	26.1899	27.8216
ENSG00000197826	C4orf22	4:80335719-80963756	0	1.50158	0.765976	3.30999	0.542629	0.183881	0.77429
ENSG00000197847	SLC22A20	11:65213839-65242757	0.775027	0.825308	0.681671	1.262	1.16149	0.850412	1.54097
ENSG00000197859	ADAMTSL2	9:133532163-133575519	2.52307	0.60985	0.677722	0.768255	0.844591	1.06505	0.718765
ENSG00000197903	HIST1H2BK	6:27146417-27146798	43.1282	75.5194	57.4334	41.9432	69.4328	49.5756	65.2275
ENSG00000197937	ZNF347	19:53124071-53159075	0.447197	0.100766	0.334269	1.23357	0.111433	0.361781	0.132151
ENSG00000197956	S100A6	1:153534598-153536244	451.088	1108.14	862.42	657.281	814.937	830.432	1125.45
ENSG00000198081	ZBTB14	18:5289018-5297053	9.35478	7.81663	6.4896	8.18931	5.08522	4.76779	4.95876
ENSG00000198125	MB	22:35606763-35637951	4.06361	2.18823	2.34989	4.21382	6.65348	5.48976	9.72846
ENSG00000198223	CSF2RA	X:1268799-1310381	0.619841	0.00935665	0.331527	0	0.355645	0.172751	0.356175
ENSG00000198369	SPRED2	2:65310850-65432637	10.3863	10.6497	12.1812	11.667	15.8851	9.66385	12.4514
ENSG00000198467	TPM2	9:35681991-35691020	57.4493	125.33	114.744	154.819	145.103	144.738	178.355
ENSG00000198478	SH3BGRL2	6:79631282-79703659	7.38087	4.33604	4.966	4.77989	4.55526	5.03169	3.24823
ENSG00000198520	C1orf228	1:44674691-44725591	1.55019	0.724073	0.67539	0.635222	2.04216	1.23103	1.15126
ENSG00000198576	ARC	8:142611043-142614472	11.0773	1.2039	1.85497	1.17268	1.47796	0.889011	1.75851
ENSG00000198604	BAZ1A	14:34752730-34875647	13.3937	22.872	25.4429	22.2565	25.1949	24.2437	26.7615
ENSG00000198618	PPIAP22	21:18857778-18858276	77.9571	120.59	108.461	59.497	100.71	109.994	110.638
ENSG00000198682	PAPSS2	10:87659612-87747705	4.12392	7.3625	5.79695	6.47953	7.25828	4.3776	5.22459
ENSG00000198695	MT-ND6	MT:14148-14673	2559.67	1345.74	2117.57	2361.28	2784.33	3095.77	3040.56
ENSG00000198756	COLGALT2	1:183929853-184037729	3.83669	2.68487	3.16992	4.78006	3.96774	2.86021	2.56217
ENSG00000198786	MT-ND5	MT:12336-14148	1936.8	1083.73	1699.43	2028.37	2052.31	2242.5	2268.56
ENSG00000198799	LRIG2	1:113073208-113132260	3.85394	2.04672	2.98571	2.33074	4.1197	2.55859	3.75319
ENSG00000198840	MT-ND3	MT:10058-10404	9262.65	5679.6	8674.1	7396.05	8618.89	10159.5	10096.6
ENSG00000198911	SREBF2	22:41833078-41907308	22.5529	9.17053	11.6107	13.2035	13.0678	10.9301	9.15149
ENSG00000198931	APRT	16:88809338-88811944	66.3056	148.404	127.739	106.975	102.708	121.973	127.794
ENSG00000198959	TGM2	20:38127386-38166578	55.7084	147.951	165.031	183.806	114.709	129.556	131.926
ENSG00000199347	RNU5E-1	1:11908151-11908271	0	0	0	0	26.9955	0	27.5894
ENSG00000199879	RNU1-120P	1:148263475-148263632	4.37255	0	0	0	0	4.39596	0
ENSG00000200169	RNU5D-1	1:44731054-44731170	78.9209	81.5515	58.6782	240.823	0	0	72.2846
ENSG00000200253	RNU6-529P	10:87041237-87041341	0	0	0	0	87.1138	0	0
ENSG00000200318	U3	15:58760465-58760681	0.992019	1.04112	0	0	0	1.02566	0
ENSG00000200795	RNU4-1	12:120293096-120293237	43.4742	0	0	0	16.3323	17.2339	12.6738
ENSG00000201134	Y_RNA	1:151841735-151841837	232.664	0	170.226	0	0	112.062	0
ENSG00000201801	RNU5E-4P	1:11909807-11909927	0	0	0	0	0	28.8754	0
ENSG00000202000	RNU1-36P	4:88000236-88000401	3.2962	0	2.56829	0	3.16745	0	0
ENSG00000202198	RN7SK	6:52995619-52995950	415.486	418.171	289.433	208.832	252.689	395.546	284.511
ENSG00000202538	RNU4-2	12:120291762-120291903	0	9.07005	0	0	8.16614	0	0
ENSG00000203711	C6orf99	6:158869938-158910353	1.3168	1.92118	1.43096	0.224839	0.996802	2.02068	2.0093
ENSG00000204140	CLPSL1	6:35781016-35793675	0.301227	0.421795	0.237727	1.09542	0	0.532988	0.730386
ENSG00000204165	CXorf65	X:71103888-71106788	0	0	0	0.718109	0	0	0
ENSG00000204179	PTPN20	10:46911395-47002488	4.70946	3.77843	3.00831	5.14632	2.59642	3.53604	3.42006
ENSG00000204262	COL5A2	2:189031895-189179879	78.9463	35.8582	48.38	51.6527	30.1073	31.0366	17.7315
ENSG00000204287	HLA-DRA	6:32439841-32445046	3.02135	0.713526	0.957713	1.01139	1.29861	1.25393	1.12844
ENSG00000204334	ERICH2	2:170783785-170798971	7.24718	6.87098	7.78482	5.08372	6.53111	8.1212	3.96738
ENSG00000204362	RP11-380J14.1	1:17189782-17197617	0.100413	1.89909	1.6536	0.897614	1.83469	1.56077	1.6777
ENSG00000204388	HSPA1B	6:31827734-31830255	108.908	113.386	96.4218	115.057	95.3155	129.185	135.02
ENSG00000204389	HSPA1A	6:31815463-31817946	115.238	124.715	103.309	124.01	103.256	142.836	149.721
ENSG00000204394	VARS	6:31777517-31795953	28.4064	56.796	54.6168	51.8892	53.0235	43.9171	49.7305
ENSG00000204428	LY6G5C	6:31676683-31684040	0.936473	1.71272	1.70852	1.47891	1.08337	2.55439	1.14035
ENSG00000204539	CDSN	6:31115089-31120446	0.452412	1.333	1.12416	1.09572	1.28178	0.889844	1.91094
ENSG00000204642	HLA-F	6:29722774-29738528	28.7271	14.1599	22.7751	23.1241	24.6559	27.2508	23.5107
ENSG00000204709	LINC01556	6:28943876-28944537	1.65412	0.631874	0.23755	0	0.591579	0.637149	0.960388
ENSG00000204941	PSG5	19:43166255-43186536	2.09349	0.257534	1.3402	3.27171	2.04187	0.605742	1.34728
ENSG00000205221	VIT	2:36696689-36814792	0.464101	0.0374344	0	0.142529	0.0828563	0.193976	0
ENSG00000205336	ADGRG1	16:57610651-57665580	61.0929	26.7189	37.3748	45.0216	46.141	34.447	32.4417
ENSG00000205420	KRT6A	12:52487173-52493257	1.12622	18.8784	19.6986	22.6086	26.3175	23.486	67.2008
ENSG00000205746	RP11-1212A22.1	16:18334399-18352476	19.5483	9.54549	12.6531	15.07	17.0335	9.94487	17.2301
ENSG00000205856	C22orf42	22:32149005-32159322	0.342977	0.846082	0.245044	0.391408	0.791128	0.575361	0.665689
ENSG00000205978	NYNRIN	14:24398785-24419288	5.41445	2.02304	2.06704	2.36826	2.4456	2.12364	1.67901
ENSG00000206503	HLA-A	6:29941259-29945884	149.765	96.5372	144.519	134.599	139.803	158.635	145.899
ENSG00000206549	PRSS50	3:46712115-46812574	1.64561	0.712457	0.541676	1.51482	0.773499	1.29734	1.21778
ENSG00000207119	U3	15:69457940-69458149	1.12244	0	0	0	1.09539	0	0
ENSG00000207205	RNVU1-15	1:144412575-144412740	3.2962	3.45181	2.56829	5.23164	3.16745	0	13.2628
ENSG00000207261	RNU6-738P	5:27111568-27111674	0	0	0	0	74.4203	0	0
ENSG00000207296	RNU6-140P	19:38797001-38797109	0	0	105.709	0	0	68.9937	0
ENSG00000207652	MIR621	13:40810765-40810861	0	0	140.704	0	0	0	0
ENSG00000209082	MT-TL1	MT:3229-3304	0	0	0	1873.95	4227.47	1276.21	0
ENSG00000210077	MT-TV	MT:1601-1670	6670.67	4396.33	0	16615.3	12931.3	13670.1	3649.26
ENSG00000210112	MT-TM	MT:4401-4469	4896.19	4854.28	0	0	0	2519.15	0
ENSG00000210140	MT-TC	MT:5760-5826	11910.6	0	0	0	4950.96	9291.8	0
ENSG00000210144	MT-TY	MT:5825-5891	11910.6	0	2275.8	13518.6	4950.96	6194.53	14694.9
ENSG00000210156	MT-TK	MT:8294-8364	0	0	0	0	1679.8	0	0
ENSG00000210164	MT-TG	MT:9990-10058	0	0	1853.37	0	0	0	0
ENSG00000210176	MT-TH	MT:12137-12206	0	0	0	3323.07	1847.33	0	0
ENSG00000210184	MT-TS2	MT:12206-12265	18355.4	0	14830.2	28941.9	10346.5	6804.39	5240.01
ENSG00000210191	MT-TL2	MT:12265-12336	0	0	1379.37	2733.09	0	0	0
ENSG00000210195	MT-TT	MT:15887-15953	0	0	2275.8	0	0	3097.27	2449.15
ENSG00000211448	DIO2	14:80197526-80387757	3.11752	18.7716	20.9466	23.305	19.8909	16.1305	23.8671
ENSG00000211454	AKR7L	1:19265981-19274194	0.337231	0.331169	0.351504	0.234782	0.712513	0.371241	0.526442
ENSG00000211799	TRAV19	14:22007511-22008181	0.74914	0	0.118342	0	0.589427	0	0.956908
ENSG00000212901	KRTAP3-1	17:41008520-41019324	2.76515	1.82843	5.01128	5.59084	5.03431	2.7179	5.42399
ENSG00000212952	RP11-475I24.9	9:42568864-42569315	0.539083	0.761696	0.297396	0.588143	0.378971	1.00163	0.972964
ENSG00000213013	RPS15AP36	19:58216179-58216561	0.432449	0	0.341801	0.34219	0	0.913425	0.459536
ENSG00000213316	LTC4S	5:179793979-179796647	0.437744	0.350446	0.000516999	0.603212	2.00069e-12	0.273509	0
ENSG00000213339	QTRT1	19:10701429-10713437	7.84553	18.7379	16.0982	17.9495	17.6812	18.4754	27.9885
ENSG00000213462	ERV3-1	7:64990808-65006743	2.8911	0.548677	2.38566	1.66292	2.73676	1.95499	2.76868
ENSG00000213626	LBH	2:30231530-30323730	127.791	54.1387	57.1991	58.8072	57.6233	62.9479	37.1227
ENSG00000213658	LAT	16:28984825-28990783	0.601242	0.207017	1.11548	0.738353	1.08764	1.08686	1.10941
ENSG00000213885	RPL13AP7	21:25361820-25362431	3.81686	4.48125	4.4891	3.51711	4.5234	5.2471	4.99243
ENSG00000214049	UCA1	19:15828960-15836320	33.5582	74.2243	73.556	85.7422	97.933	82.6105	97.3796
ENSG00000214578	HMGN2P15	17:42753529-42753799	1.02617	2.92254	4.43194	1.58246	0.965028	2.89302	2.94808
ENSG00000214706	IFRD2	3:50287731-50292918	16.1691	37.2546	35.0552	33.181	34	34.8659	42.5393
ENSG00000214855	APOC1P1	19:44926803-44931386	0.516719	2.5391	0.362492	0.574417	1.36265	0.0997876	3.42733
ENSG00000214860	EVPLL	17:18377661-18389647	0.83522	0.239136	0.822163	0.908282	0.508395	1.02576	1.61829
ENSG00000215158	RP11-1023L17.1	5:34164697-34244796	11.8783	7.73928	8.38951	9.61072	7.43269	7.65523	6.6477
ENSG00000215386	MIR99AHG	21:16070521-16627397	3.36451	2.58286	0.805558	1.01539	0.761218	0.721745	2.78119
ENSG00000215548	FRG1JP	9:63832126-63859641	0.635668	0.490573	0.312174	0.359506	0.830001	0.404357	0.286583
ENSG00000215612	HMX1	4:8846075-8871817	7.86257	6.93846	6.80368	6.84351	4.43862	6.70466	3.9195
ENSG00000216867	AC114776.1	2:110633946-110634333	0.105391	0.0553613	0.208239	0.750474	0	0.0556653	0
ENSG00000217275	RP1-34B20.4	6:26202155-26202654	1.47618	1.19821	1.1392	1.06005	1.78164	0.900963	1.89329
ENSG00000217442	SYCE3	22:50551111-50562905	0.804671	0.571098	0.635665	0	1.10802	1.19275	1.02759
ENSG00000217801	RP11-465B22.3	1:1059733-1069355	16.4362	13.6472	13.5893	16.4181	19.7494	11.085	21.8797
ENSG00000218073	RP1-13D10.2	6:16160925-16161411	0.280282	0.147212	0.22135	0.442866	0.137822	0.44555	0
ENSG00000218537	MIF-AS1	22:23894425-23898930	111.059	193.33	157.199	145.369	121.011	184.033	146.025
ENSG00000219665	CTD-2006C1.2	19:11987616-12046275	1.2496	1.25958	1.32087	2.22376	1.24696	0.816642	2.91385
ENSG00000219891	ZSCAN12P1	6:28091153-28093664	2.14322	3.27902	1.90267	4.33568	1.64373	3.05052	2.17939
ENSG00000220685	RP11-530A18.1	6:5065794-5066982	0	0.129923	0	0.130004	0	0	0.439811
ENSG00000220785	MTMR9LP	1:32231657-32241620	0.612146	0.264908	0.173608	0.327525	0.173844	0.51709	0.144427
ENSG00000220804	AC093642.5	2:242088632-242160153	4.72324	2.26301	2.99232	1.86669	4.65407	3.60737	2.15682
ENSG00000221553	AC004924.1	11:67933213-67933362	6.02612	0	0	0	11.426	0	0
ENSG00000221676	RNU6ATAC	9:134164438-134164564	40.2486	20.9103	15.18	31.1367	55.2693	4.90191	18.89
ENSG00000221869	CEBPD	8:47736908-47739086	6.74146	9.54878	8.42386	7.45584	4.89509	6.01382	4.89467
ENSG00000221890	NPTXR	22:38818451-38843982	27.0381	11.9402	15.5327	19.1444	16.3154	14.3663	12.3609
ENSG00000221968	FADS3	11:61873518-61892051	21.6795	11.5607	17.3883	18.3372	16.835	17.3026	17.4465
ENSG00000222009	BTBD19	1:44808481-44815585	0.132026	0.133963	0.630984	0.395004	0.614704	0.335649	0.784795
ENSG00000222041	LINC00152	2:87455367-87606805	39.0083	105.562	83.5082	75.8408	98.408	72.3188	98.9531
ENSG00000222439	RNU6-994P	20:63337338-63337449	0	0	0	0	50.8136	0	0
ENSG00000222724	RNU2-63P	2:88016353-88016547	4.54511	7.9444	1.19033	0	2.94718	1.5547	0
ENSG00000223198	RNU2-22P	2:231501989-231502201	0	0	0.837717	0	0	0	1.10327
ENSG00000223356	RP11-66D17.5	1:156712211-156713174	0	0.179558	0	0	0.504331	0.180877	0.909232
ENSG00000223718	AC093107.7	7:135660038-135660647	0	0.207344	0	0	0.0970502	0	0.736162
ENSG00000223764	RP11-54O7.3	1:916864-921016	2.11503	0.380784	0.485023	0.92529	0.56002	0.473901	0.557
ENSG00000224034	RP11-445P17.8	10:5266032-5271236	0.164582	0	0.12984	0.129808	0.242655	0	0.438406
ENSG00000224259	LINC01133	1:159961217-159984750	0.611012	0.897144	1.7161	2.91874	5.8278	1.89425	2.01187
ENSG00000224302	RP11-302K17.3	10:102085475-102085730	0	0	0.451981	0	0	0	0
ENSG00000224324	THAP5P1	7:158623187-158623449	0.17616	0.185008	0.417595	0	0.518697	0	0
ENSG00000224376	AC017104.6	2:231388975-231394991	0.114571	0.115415	0.115559	0	0.511048	0.277893	0.156294
ENSG00000224389	C4B	6:32014761-32035418	10.6304	2.98383	4.58338	4.80498	5.72692	7.8075	6.19436
ENSG00000224452	RSL24D1P6	20:32170389-32170790	0.787446	0	0.933437	0.622877	0.580903	1.04044	0.627927
ENSG00000224861	YBX1P1	14:66012829-66013789	22.0671	40.369	28.5583	27.3475	27.955	27.4457	29.9826
ENSG00000224905	AP001347.6	21:14027420-14144468	2.18454	1.20742	1.91273	0.608266	1.38451	1.17453	0.797742
ENSG00000224965	KCNC4-AS1	1:110208833-110209987	0.591873	0.310718	0.233428	0.700051	0	0.393163	0.315348
ENSG00000225096	XXbac-BPG55C20.7	6:57965629-57972218	1.15654	0.383648	0	1.1583	0.179484	1.15028	0
ENSG00000225123	RP11-255A11.4	9:33574360-33574588	0	0	0.646111	0	0	0	0
ENSG00000225138	CTD-2228K2.7	5:473235-480884	14.6637	4.75757	4.38376	9.22187	8.25311	5.49759	8.98911
ENSG00000225216	AC007362.3	2:205756468-205764006	0.210781	0.221445	0.324528	0	0.621974	0	0.448039
ENSG00000225218	AP001628.6	21:42831039-42836477	0	0	0	1.33122	0	0	0
ENSG00000225383	SFTA1P	10:10784436-10794980	4.92684	13.0513	13.289	22.87	23.305	11.0278	23.7326
ENSG00000225434	LINC01504	9:72305429-72343210	0.888489	0.177747	0.66812	0.315406	0.710171	0.231964	0.776918
ENSG00000225614	ZNF469	16:88427470-88440757	0.59908	0.721898	1.09287	0.884183	0.76544	0.461498	0.696673
ENSG00000225648	SBDSP1	7:72829424-72836701	27.7907	74.2247	54.936	49.1161	49.2501	49.3086	49.2819
ENSG00000225766	DHRS4L1	14:24036452-24051028	1.3996	0.907077	0.493691	0.636449	0.955537	0.883455	0.76497
ENSG00000225770	AC092933.3	3:196536531-196536702	0	0	0	0	0	2.76861	0
ENSG00000225965	RP11-508N22.6	10:38161569-38161749	0	0	0	0	0	2.16014	0
ENSG00000225981	AC102953.4	7:1459936-1464008	0.134638	0.565711	0	0.425414	0.264811	0	0.43007
ENSG00000226002	GTF2IP14	7:65084102-65100232	0.731491	0	0.577335	0.659806	0.821912	0.443679	0.333947
ENSG00000226107	AC004383.3	X:134522701-134522990	0.404629	0	0	1.28376	0.795149	0.424219	0.427319
ENSG00000226251	RP11-15I11.3	1:212225277-212238977	0	0	0.66579	0.889344	0.552105	0.295639	0.297678
ENSG00000226277	AC105393.2	2:421056-422303	0	0.841262	0.420767	0	0.349198	0.3756	0.714937
ENSG00000226281	RP1-80N2.2	6:6692743-6711002	0.109516	0	0.0864449	0.518692	0	0.348661	0.466612
ENSG00000226308	RP4-813D12.3	20:57266796-57282998	5.8732	0.398588	1.19997	0.465318	0.995988	0.898092	0.539704
ENSG00000226310	RP3-323P24.3	X:57121661-57127243	0.261002	0	0.0686421	0.411773	0.0855189	0.0924158	0.463474
ENSG00000226312	CFLAR-AS1	2:201140277-201157823	0.208749	0.226804	0.494089	0.135751	0.921079	0.569128	0.224661
ENSG00000226328	NUP50-AS1	22:45133019-45163781	3.96817	5.9144	4.65465	3.87365	6.22687	3.70549	6.33222
ENSG00000226380	AC058791.1	7:130876808-130913310	0.351088	1.23756	1.27765	1.93903	1.04392	0.569092	2.10026
ENSG00000226386	PARD3-AS1	10:34815766-34816386	0.724511	0.761062	0.572807	1.14885	0	0.380352	0.383113
ENSG00000226465	RP13-401N8.1	20:25751217-25752761	0	0.16574	0.498957	0.250042	1.08585	0.331883	0.668475
ENSG00000226608	FTLP3	20:4023916-4024444	1.34851	0.965743	1.24212	0.935797	1.42649	1.40857	1.10973
ENSG00000226686	LINC01535	19:37251911-37265535	0.132036	0.239635	0.10413	0.0817819	0.448678	0	0.140708
ENSG00000226690	AC005281.1	7:12496428-12541910	0.182263	0.047829	0.290672	0	0.547154	0.463022	0.114024
ENSG00000226738	CTA-384D8.31	22:50546414-50547652	0	0	0	0	4.17626	0	0
ENSG00000226965	AC003088.1	7:110432238-110534754	0.543892	0	0.32213	0.429648	0.13372	0.288254	0.434325
ENSG00000227150	RP11-473E2.3	9:134552737-134553897	0	0	0.694981	2.09274	0.863627	0	1.39116
ENSG00000227195	MIR663AHG	20:26186919-26251526	0	0.147208	0.167217	0.530053	0	0.0948187	0
ENSG00000227440	ATP5G1P4	3:172828735-172829176	0.496338	0	0.522818	0.261573	0.650907	1.75131	0.880244
ENSG00000227507	LTB	6:31580524-31582522	0.174966	0.29065	0.34539	2.87785	0.496383	0.718394	0.739641
ENSG00000227630	LINC01132	1:234724041-234731643	1.81288	0.311076	0.691615	0.556331	0.783844	0.826234	0.8024
ENSG00000227634	RP11-431K24.3	1:8202428-8215210	0.992856	0.306559	1.10528	0.828533	2.26133	1.24231	1.55611
ENSG00000227674	LINC00355	13:63986370-64076011	1.30849	1.42106	1.09639	0.556743	0.717692	0.949277	0.738982
ENSG00000227733	RP4-565E6.1	1:148159212-148255012	0.787429	1.10529	1.04478	0.988671	1.03663	0.88415	0.482903
ENSG00000227852	RP11-156G14.6	9:35592785-35592951	0	3.34079	0	5.06399	0	3.22752	0
ENSG00000227868	C1orf234	1:23010833-23015850	0.649787	0.301599	0.102616	0	0.511194	0.152102	0
ENSG00000228126	FALEC	1:150515756-150518032	0.550518	0.578192	0	0.695311	0.324767	0.350522	0.703667
ENSG00000228350	CELSR3-AS1	3:48663775-48669174	2.90228	4.5659	0	2.30837	0	1.49028	0
ENSG00000228353	RP11-184A2.2	10:3767914-3768751	0	0	0.788214	0.526769	0.980088	0.698596	0.351802
ENSG00000228364	SAR1P1	6:29076572-29077168	0.713332	0	0	0.160844	0.100186	0.108179	0.108556
ENSG00000228398	HMGN2P25	3:141865011-141865279	0	0	0	0	0.486507	0	0
ENSG00000228519	RP11-298C3.2	X:25645721-25646327	4.70664	10.8081	7.70343	9.2854	7.07104	9.46604	9.37475
ENSG00000228526	MIR34AHG	1:9148010-9196983	3.08764	1.06481	1.61148	2.05885	2.47555	1.48062	2.74228
ENSG00000228624	RP3-399L15.3	6:113969700-114471705	0.681092	0.0409988	0.213954	1.05287	1.01357	0.315594	0.0832762
ENSG00000228742	RP5-884M6.1	7:106775010-106795564	3.48754	4.86577	5.19908	6.17213	10.0052	3.86142	7.39635
ENSG00000228791	THRB-AS1	3:24494086-24681711	0.268555	0.0421217	0.420883	0.724095	0.669714	0.394036	0.379142
ENSG00000228973	AC009955.8	2:219625058-219626693	0	0	0	0	0	0.502444	0
ENSG00000229109	RP11-439K3.1	9:83219330-83234242	0.163482	0	0.38745	0	0	0	0
ENSG00000229409	RP11-494O16.3	22:49845928-49846090	0	0	0	0	0	3.68194	0
ENSG00000229468	RPL39P18	3:20012451-20012606	0	0	3.65947	0	0	0	0
ENSG00000229526	KRT16P4	17:18450243-18475920	0.0416089	0	0	0	0.0245496	0.508481	0.388826
ENSG00000229536	AC079776.1	2:129869192-129877553	0.554983	0	0.175231	0	0	0	0
ENSG00000229544	NKX1-2	10:124445238-124450184	0.660163	0.516171	0.907585	1.79302	1.14417	0.689677	0.800531
ENSG00000229605	RP11-492M23.2	10:28898995-28899484	4.82589	8.03753	7.05801	6.24766	6.6672	7.45237	6.57523
ENSG00000229625	RP11-44N12.2	8:98961427-98968284	0	0	0.11965	0	0.446947	0	0.241856
ENSG00000229660	RP5-1142J19.1	7:157281535-157282686	0.662398	0.11595	0.174287	0.174297	0.325642	0.117153	0.823149
ENSG00000229733	RP5-1189B24.1	X:123558349-123558584	0	0	0	0	0	0.768394	0
ENSG00000229870	RP11-507K13.6	10:49815095-49815562	0.74914	0.944363	0.118342	0	0.589427	0.158712	0
ENSG00000229891	LINC01315	22:42364399-42369236	2.10228	1.31794	1.36216	1.22786	0.518428	2.41691	0.555755
ENSG00000229932	YWHAZP3	10:23136923-23137661	3.0388	6.4999	6.66604	4.15876	4.76382	3.99023	3.37189
ENSG00000229956	ZRANB2-AS2	1:71081323-71489976	0.960819	0.482876	0.338537	0.967741	0.547156	1.00301	0.580096
ENSG00000230058	RP11-172E9.2	13:40343956-40350303	0	0	0.38745	0	0	0	0
ENSG00000230160	AC004854.5	7:44919668-44920329	0	0	0.205709	0	0.767734	0	0
ENSG00000230228	RP11-4M23.4	1:23949015-23949383	0.660199	0.734396	0.42977	0.36886	1.06952	0.389349	0.530317
ENSG00000230311	TOMM20P4	X:73223123-73223558	0.339032	0.94979	0.446421	0.223359	1.08376	0.837229	0.601207
ENSG00000230454	U73166.2	3:50260302-50263358	1.32227	0.309676	0.432205	1.32479	1.03958	0.215798	0.467905
ENSG00000230461	PROX1-AS1	1:213817750-213988508	0.78812	0.227725	0.0191203	0	0.298025	0.00862352	0.00862762
ENSG00000230606	AC159540.1	2:97416164-97433527	11.1357	5.48726	9.9645	11.1776	13.3366	11.9922	17.0798
ENSG00000230650	AC112229.1	2:110360607-110363737	0.393651	0.535305	0.677137	0.300658	0.61539	0.513772	0.877967
ENSG00000230673	PABPC1P3	X:74583087-74583546	0.308629	0.162109	0.121893	0	0.455316	0	0.164245
ENSG00000230756	RHOQP3	2:130212869-130213490	2.16469	3.36884	1.9752	1.74425	3.2081	2.23487	1.42632
ENSG00000230758	SNAP23P	20:49038356-49038602	0	2.01089	0	0	2.50338	0.664757	0
ENSG00000230801	RP11-243J16.8	20:31808502-31808749	0	0	0.497815	0	0	0	0
ENSG00000230929	RP11-395C3.1	5:126628018-126628319	0.730447	0.0959119	0.866247	0.57915	0.807677	0	0.386214
ENSG00000230943	RP11-367G18.1	6:113623534-113650074	1.68795	0	0.476977	1.31647	0.593747	0.4796	0.160649
ENSG00000231056	RP1-290I10.5	6:10474499-10478502	1.13101	1.18776	1.34031	0.8981	1.66452	0	0.594192
ENSG00000231170	AC002451.3	7:95596681-95613719	0.142123	0	0	0	0.11063	0	0.519821
ENSG00000231465	RP11-542K23.9	9:122471357-122475817	3.82509	0	0	1.73548	0	0	0.574493
ENSG00000231473	LINC00441	13:48296512-48303661	0.0432146	0	0.70726	0.204258	0.0849142	0.79713	0.092128
ENSG00000231566	RP5-1158E12.3	X:45848073-45851490	0.224317	0.706996	1.41844	0	0.441269	0.710454	0.476619
ENSG00000231738	TSPAN19	12:85014310-85036277	1.16404	0.352769	0.899561	0.450355	0.598598	0.625911	0.236776
ENSG00000231742	LINC01273	20:50172549-50176671	1.6378	1.54814	2.22829	1.74746	3.33563	1.09503	2.42819
ENSG00000231774	RP11-402P6.11	X:71760774-71761659	2.7846	12.6653	9.88014	2.21368	4.99112	4.80387	7.24463
ENSG00000231924	PSG1	19:42866463-42879822	0.115769	0.108936	0.0915478	0.778236	0.515875	0.288549	0.189416
ENSG00000231967	RP11-12D24.6	9:5356311-5356525	0	0	0.80901	0	0	0	0
ENSG00000231977	RP5-963E22.4	20:63166796-63180903	0.117676	0.494391	0	0.185823	0.231418	0	0.12533
ENSG00000232075	MRPL35P2	10:63634316-63634827	0.516564	0.271299	0.10197	0.611977	0	0.273854	1.23765
ENSG00000232104	RFX3-AS1	9:3526722-3691814	0.297882	0	0.428088	0.144554	0.112483	0	0
ENSG00000232119	MCTS1	X:120594009-120612479	50.147	92.7354	84.6087	83.3975	74.0402	91.6909	78.1151
ENSG00000232119	MCTS1	X:120611328-120621074	0.46772	1.08057	1.0334	0.738054	1.28741	1.88744	0.697615
ENSG00000232139	LINC00867	10:118357107-118365103	0	0	0	0	0.629569	0	0
ENSG00000232202	AC098824.6	2:42826321-42827617	0.573845	0	0.0822608	0.0822145	0.102517	0.055497	0
ENSG00000232295	RP11-154D6.1	6:71221456-71328228	0.282272	0.394201	0.835941	0.83902	0.639401	0.730975	0.0992076
ENSG00000232316	RP1-124C6.1	6:113428539-113433421	0	0.260644	0.305878	1.39323	0.752218	0	0.412508
ENSG00000232352	SEMA3B-AS1	3:50266640-50267371	0	0.292987	0.440974	0	0.548521	0	1.47885
ENSG00000232354	VIPR1-AS1	3:42506464-42533258	0.680748	0	0.229227	0.697802	0.72399	0.467237	0.901716
ENSG00000232654	FAM136BP	6:3045383-3045800	0	0.57675	0.289194	0.289425	0.179995	0.193553	0.486597
ENSG00000232678	SPTLC1P4	1:152077951-152078211	0.540336	0	0.426941	0	0.530276	0	0.568178
ENSG00000232732	AC073043.1	2:199867395-199911159	0	0.148207	0	0.0572766	0.619991	0	0.138078
ENSG00000232882	PHKA1P1	1:90892991-90893612	0.191899	1.00762	0.492155	0.757088	0.330137	0.35659	0.664425
ENSG00000232931	LINC00342	2:95807117-95816215	1.12074	0.857525	0.99249	1.16993	1.95126	1.44982	2.32837
ENSG00000232956	SNHG15	7:44983022-44986961	17.9228	51.0589	46.7458	45.8109	58.6411	44.7576	62.228
ENSG00000232965	RPS12P18	10:79544086-79544356	0	0	0	0	0.317705	0.676729	0.511228
ENSG00000233090	AC015922.7	17:15792861-15793045	0.956179	1.00236	2.24893	0	4.63578	1.95381	2.93246
ENSG00000233117	LINC00702	10:4201140-4243912	0.331453	0.546448	0.196957	2.55765	0.685283	0.250287	2.3909
ENSG00000233308	OSTN-AS1	3:191213290-191234605	0.127538	0	0.50351	0.201452	0.125417	0	0
ENSG00000233330	RP1-12G14.7	6:149591754-149592663	0.550613	0.578449	1.52357	0	1.62445	0.870073	1.16802
ENSG00000233493	TMEM238	19:55379244-55384598	3.15422	3.47128	3.36922	3.36727	2.04947	3.73457	2.38588
ENSG00000233608	TWIST2	2:238848031-238910543	4.46628	4.5336	4.19456	4.34894	3.4017	4.46264	2.46495
ENSG00000233762	AC007969.5	2:171517269-171517716	8.48209	12.4043	10.2573	11.4595	8.18368	10.1206	12.9523
ENSG00000233822	HIST1H2BN	6:27837759-27865798	4.38338	5.48503	2.42941	2.78408	3.133	2.97047	1.75953
ENSG00000233929	MT1XP1	1:16241212-16241398	0	0	0	0	1.76672	0	0
ENSG00000234160	RP11-613M10.6	9:37509149-37510299	1.21389	2.55011	0.959629	0	1.98787	2.96953	1.28196
ENSG00000234223	AC003988.1	7:80246408-80312456	0.106671	0.11203	0.0841943	0.168391	0.104877	0.113215	0.568132
ENSG00000234283	RP11-495P10.6	1:148271883-148280749	0	0.379477	0	0.571262	0.177643	0.382092	0
ENSG00000234352	AC009264.1	7:136685558-137182107	0.52425	0.445147	0.428574	0.553824	1.15136	0.283297	0.160083
ENSG00000234367	PFN1P3	1:145407771-145408173	1.69308	0.304195	0.772908	1.43618	1.08246	1.83643	1.45831
ENSG00000234689	LINC00444	13:47905328-47907357	0	0	2.38576	1.60468	0.985817	0	2.09646
ENSG00000234745	HLA-B	6:31353871-31357188	121.881	87.9228	138.013	125.628	119.091	118.283	117.395
ENSG00000235062	BCRP5	22:20697961-20698934	0.16736	0	0	0	0.574598	0	0
ENSG00000235084	CHCHD2P6	1:15604596-15605043	0.969382	0.636482	0.39353	0.255413	0.913712	2.09539	0.472816
ENSG00000235139	AC003984.1	7:84532475-84584322	0.281199	0.0110129	0.230512	0.0660741	0.583973	0.559766	0
ENSG00000235169	SMIM1	1:3772787-3775982	6.66611	3.4876	2.45339	1.83711	3.88949	4.11844	1.48695
ENSG00000235173	HGH1	8:144137768-144140843	5.48292	11.4096	9.23865	8.26508	7.67805	9.07465	9.12542
ENSG00000235185	RP5-1056L3.1	1:19591801-19596832	0	0	0	0	1.13631	0	0
ENSG00000235316	DUSP8P5	10:73731823-73733638	1.18948	0.66401	0.558394	1.3948	0.894933	0.700804	0.809453
ENSG00000235535	RP11-532N4.2	6:123389420-123510241	0.875801	0.587078	0.993746	0	0.9599	0.437518	0.930201
ENSG00000235568	NFAM1	22:42380409-42432395	0.341475	0.708176	0.125526	0.22691	0.350293	0.28313	0.202293
ENSG00000235578	XXbac-B33L19.4	22:20343202-20344365	0.162198	0.624783	0.213556	0.25642	0.478593	0.0858596	0
ENSG00000235659	RP11-374M1.5	9:61865754-61866965	0.250172	0.525635	0	0	0	0.176534	0
ENSG00000235688	AC116614.1	2:949626-950274	0.712176	0	0.562238	0.937197	0.583567	0.503645	0.379244
ENSG00000235703	LINC00894	X:149938627-150224580	0.880197	2.17594	1.75709	2.44221	1.60871	0.845773	1.87097
ENSG00000235790	RP11-73M7.6	1:31644048-31660162	0.21501	0	0.366887	0.170445	0.0650695	0.151973	0.553191
ENSG00000235848	RMDN2-AS1	2:37949910-38067041	0	0.191405	0.154324	0.154312	0	0	0.483761
ENSG00000235857	CTBP2P1	Y:56855243-56855488	0	0	0.510562	0	0	0	0
ENSG00000235907	RP4-580O19.2	1:33512007-33512743	0.22686	0.476388	0	0.119261	0.0743222	0.0803656	0.161157
ENSG00000236060	HSPB1P1	9:72007880-72008136	5.18379	8.21533	5.06341	12.5734	11.4667	8.16192	11.4877
ENSG00000236130	PTCSC2	9:97805934-97810008	0	1.29398	1.94131	0	0	1.27038	0
ENSG00000236217	C1DP2	10:80031967-80032393	0.278672	0.123269	0.0463539	1.11331	1.29836	0.713832	0.911211
ENSG00000236280	AC114737.3	7:76968345-76968518	5.14239	2.69394	5.02347	2.04297	1.24098	13.0614	3.90979
ENSG00000236384	LINC00479	21:41711519-41715775	2.0932	0.351188	0.580229	0.721554	0.850145	1.56627	1.27006
ENSG00000236431	AC009237.11	2:95536116-95536495	0.658868	0.692203	0.69436	1.39035	0	0	0
ENSG00000236529	RP13-254B10.1	7:65840211-65840596	0.425853	0	0.673159	0.336951	0.418869	1.12453	0.452571
ENSG00000236581	STARD13-AS	13:33180400-33281584	0.111904	0.338734	0.638376	0.429118	0.26709	0.477085	0.195687
ENSG00000236713	RP11-363I22.3	1:150780271-150780644	0	0	0	0.71778	0	0	0
ENSG00000236824	BCYRN1	2:47331059-47344517	0.170212	2.09591	1.378	1.48097	1.66378	1.66385	2.44068
ENSG00000236848	RPL23AP95	7:103152006-103152325	0.0639417	0	0.404235	0.0902375	0	0.534515	0
ENSG00000236975	RP5-1065P14.2	1:229092814-229094905	0.303454	0.424915	0.638634	0	0.298333	0.322147	0.215509
ENSG00000236983	LINC00614	10:26943322-26944418	0.0454261	0.381618	0	0	0.267927	0.0964913	0.338781
ENSG00000237049	RPL34P1	1:168210615-168210969	0	0	0	0	0.744961	0	0
ENSG00000237128	RP11-351M16.3	10:28433007-28495813	0	0	0	0	0.462294	0	0
ENSG00000237252	RP11-322A17.1	X:76222636-76223097	0	0.160904	0	0	0.602576	0	0
ENSG00000237310	GS1-124K5.4	7:66493705-66495474	5.44428	4.15231	3.40278	2.36683	5.98318	3.4148	4.52757
ENSG00000237352	LINC01358	1:58933642-59240555	0.0668634	0.0935793	0.156909	0.335068	5.37958	0.0996236	0.389227
ENSG00000237379	CBX1P3	1:203954639-203955780	1.10663	0	0.291237	0.388389	0.604549	0.391226	0.39284
ENSG00000237424	FOXD2-AS1	1:47432132-47434641	0.79756	1.19036	1.57793	1.89734	1.75819	0.925237	1.94641
ENSG00000237617	AC013410.2	2:173705947-173706148	0	0	1.02941	0	0	0	0
ENSG00000237643	RP11-462G2.1	6:70394886-70399417	0	0	0	0.634919	0	0.212058	0.213318
ENSG00000237749	RP3-423B22.5	1:37556246-37556499	26.7058	33.8998	24.071	20.3019	26.5772	21.4261	25.298
ENSG00000238037	OOSP1P1	1:44155027-44155301	0	0	0	0	0.457708	0	0
ENSG00000238049	LL0XNC01-105G4.3	X:103347461-103347729	0	0	0.391616	0	0	0	0.521783
ENSG00000238151	MLLT10P1	20:30403122-30403384	0	0	0.417595	0	0.518697	0	0.55591
ENSG00000238260	RP11-46F15.2	1:3623189-3624743	0	0.301579	0.528775	0	0.282314	0	0.509905
ENSG00000238266	LINC00707	10:6779597-6842906	0.214009	5.315	3.63054	1.97634	2.00379	1.47463	3.11858
ENSG00000238755	RP11-23D24.2	3:153384933-153980186	0.127949	0	0	0.496502	0.14485	0.0247721	0.421188
ENSG00000239122	RNU2-11P	3:195928588-195928775	1.77761	0	0	0	0	1.81863	0
ENSG00000239365	RPS26P49	14:104830837-104831171	1.1453	0	0	0	1.12625	0	0.303583
ENSG00000239650	GUSBP4	6:57919783-57930291	1.37317	0.332691	0.316843	0.480982	1.00317	0.558948	0.482198
ENSG00000239719	RP4-800G7.1	7:149191042-149191223	2.82048	4.47052	3.17963	0.656329	5.59726	3.78991	3.5792
ENSG00000239827	SUGT1P3	13:40882576-40921774	1.44506	0.299919	0.733392	0.274373	1.57255	0.555838	0.701945
ENSG00000239881	RPS27P25	12:120369439-120371688	2.48997	0	1.47495	0	0.138768	1.14044	0.150222
ENSG00000239944	TRBV8-2	7:142386377-142386647	0	0	1.15076	0	0	0	0.511228
ENSG00000240086	RP11-657O9.1	3:135356066-135439888	0.492027	0.56463	0.364894	0.102102	0.173073	0.881457	0
ENSG00000240270	RPL12P37	17:80976453-80976948	0.951811	0.285662	0.859013	0	0.802319	0.43238	0.434325
ENSG00000240344	PPIL3	2:200870906-200889303	22.6189	23.4574	21.13	17.3183	26.1241	16.8787	30.4232
ENSG00000240497	RP11-185E8.1	3:171468083-171469633	0.80675	3.3879	2.5462	2.56463	2.36898	2.51111	0
ENSG00000240972	MIF	22:23894003-23895227	122.592	181.671	140.625	149.889	81.0658	176.43	95.0104
ENSG00000241288	RP11-379B18.5	3:125827237-125916384	1.77767	0.242004	1.14679	2.13881	2.81951	1.75459	2.55719
ENSG00000241352	RP11-392P7.1	12:12850981-12851740	0.181364	0.0380841	0.0572206	0.114402	0.237661	0.192771	0.657096
ENSG00000241458	RPL7P19	5:138473743-138474361	3.28509	3.06982	2.33812	2.59052	1.87948	2.63925	2.60553
ENSG00000241464	RPL39P38	19:18285342-18285495	0	0	0	0	4.86045	0.511751	0
ENSG00000241635	UGT1A1	2:233760247-233773299	0.2526	0.0347861	0.11339	1.39462	0.152265	0.32841	0.327074
ENSG00000241769	LINC00893	X:149527590-149540959	1.04521	0.963044	0.612489	1.84358	0.850532	1.11471	1.13529
ENSG00000241821	RN7SL170P	20:56688400-56688695	0.384005	0	0.303587	0.609048	0	1.61152	0
ENSG00000241860	RP11-34P13.13	1:141473-173862	4.86013	3.14311	3.50353	4.33255	3.80418	2.3385	5.50943
ENSG00000241956	CTC-340A15.2	5:164296695-165171643	1.2207	0.35862	0.859375	0.431698	0.964661	0.687743	0.659603
ENSG00000242808	SOX2-OT	3:180989769-181836880	0.944625	0.104426	0.341923	0.189653	0.193785	0.21895	0.352334
ENSG00000243137	PSG4	19:43192701-43207299	0.53546	0.128256	0.16843	0.729653	0.282321	0.171993	0.46564
ENSG00000243199	RP11-408P14.1	4:65573458-65574328	1.44542	3.62061	1.88665	1.85628	2.13552	2.35941	2.00042
ENSG00000243225	RP11-7F17.1	14:76968682-76969145	1.82446	3.03463	4.08312	3.36423	7.17755	4.34801	9.87164
ENSG00000243244	STON1	2:48529382-48598513	7.74364	1.34502	1.3728	2.541	2.38245	2.49513	1.48762
ENSG00000243449	C4orf48	4:2041992-2043970	27.7519	23.0587	15.2765	23.0484	10.0164	20.7515	14.1809
ENSG00000243566	UPK3B	7:76510427-76516521	125.126	55.1855	58.6059	77.4956	68.64	90.2086	50.1812
ENSG00000243648	RP11-215P8.1	5:134422837-134423335	0.418873	0.461997	0.0295333	0.212707	0.397217	0.428161	0.143357
ENSG00000243649	CFB	6:31945649-31952084	18.0175	5.89046	8.17474	6.971	9.49672	9.04788	8.17163
ENSG00000243678	NME2	17:51165434-51171747	223.677	637.41	522.087	430.375	444.04	531.208	543.939
ENSG00000243968	RN7SL402P	19:35881889-35882153	0	0	0	0	0.507556	0	0
ENSG00000244086	RPS20P35	17:38855313-38855670	3.26191	5.09349	6.05971	3.22067	4.46461	3.12625	2.98225
ENSG00000244310	RP11-734K21.3	2:9115196-9116884	0.233011	0	0.184187	0	0	0	0.989924
ENSG00000244541	LINC01213	3:150238518-150240209	0	0.779582	0.928145	1.10445	1.09475	1.18076	0.65867
ENSG00000244731	C4A	6:31982023-32002681	11.0647	2.98184	4.77451	5.19982	5.87482	7.9588	6.52243
ENSG00000245248	USP2-AS1	11:119381777-119526664	1.1754	1.84157	1.30983	1.32977	2.46459	0.771944	1.19422
ENSG00000245526	LINC00461	5:88507545-88691041	0.48353	0.0810641	0.349168	0.141866	0.240259	0.300151	0.352988
ENSG00000247626	MARS2	2:197705368-197708387	3.15187	5.289	5.43542	3.361	3.29532	3.40484	3.93373
ENSG00000247844	CCAT1	8:127207865-127219088	0.0847236	0.244511	0.417228	0.666969	0.561717	0.767123	1.87436
ENSG00000247877	CTD-2001C12.1	5:100449753-100535262	0.258526	1.5664	0.618827	0	0.586503	0.0317675	0.328195
ENSG00000248079	DPH6-AS1	15:35546194-35859001	1.56055	0.841721	0.302498	1.74848	0.563767	0.407856	0.833957
ENSG00000248202	RP11-455B3.1	5:97881419-97922695	0	0	0	0	0.586385	0	0
ENSG00000248334	WHAMMP2	15:28737582-28759204	1.04326	0.549643	0.746748	0.843322	1.04332	0.745069	0.783969
ENSG00000248367	CTB-129O4.1	5:180293244-180295253	0	0.859756	0.48507	0	1.00617	0.432359	0.86991
ENSG00000248905	FMN1	15:32765544-33194733	2.0904	0.855976	0.996813	2.26172	2.01236	0.707184	1.03561
ENSG00000249072	RP11-777B9.5	4:78008511-78008688	0	0.802071	0.598898	0	4.07091	1.55856	0
ENSG00000249092	CTD-2325A15.3	5:42892318-42892817	1.64939	0.39064	0.397901	0.0151436	0.821027	0.320453	2.19166
ENSG00000249242	TMEM150C	4:82483169-82562357	1.35292	0.180455	0.501551	0.757736	0.53331	0.380583	0.366722
ENSG00000249650	RP11-310P5.1	5:602619-612210	0.309556	0	0.0814378	0	0.304339	0.109532	0.549592
ENSG00000249803	RP11-114H21.2	5:136466676-136520298	0	0.00920403	0.115392	0	0.603337	0.0927162	0.275229
ENSG00000250081	CTD-2116N20.1	5:65486443-65487048	0.473876	0.74677	0	0.375099	0.699127	0.750018	0.251621
ENSG00000250237	CTC-498J12.1	5:69038517-69043821	0.334913	0	0.396888	0	0	0.177244	0.17818
ENSG00000250342	SNRPCP16	4:9051841-9052051	0	1.15651	0	0	3.22742	0	0
ENSG00000250546	RP11-8L2.1	4:83796435-84293412	1.71171	0.76438	0.796557	1.63448	0.283572	0.494305	0.646829
ENSG00000250662	HNRNPKP5	5:14877666-14877919	0	0	0	0	0	0.610823	0
ENSG00000250722	SEPP1	5:42799879-42887392	10.9079	0.990092	2.04092	2.85271	4.27754	3.78863	3.12146
ENSG00000250903	GMDS-AS1	6:2245747-2482022	4.97248	1.99808	1.42986	4.06631	3.60832	3.6608	2.55856
ENSG00000251155	SEPT14P4	4:118640672-118640858	0	1.08174	1.4282	0	1.98756	1.86202	2.09683
ENSG00000251169	AC005355.2	5:134506551-134509229	0.94326	1.273	0.424904	1.62776	0.750222	1.29056	1.2927
ENSG00000251322	SHANK3	22:50674414-50733298	2.23731	2.40707	2.11382	2.5398	1.60035	1.64271	1.78604
ENSG00000251613	CTC-347C20.1	5:72687111-72762727	0.401478	0	1.18784	0	0.349285	0.619261	0.0572009
ENSG00000252051	RN7SKP276	1:229410499-229410767	0	0	0	0	0.486507	0	0
ENSG00000252061	RNU6-415P	15:78898839-78898936	0	0	129.157	0	0	0	0
ENSG00000253103	LINC01609	8:111098960-111236203	2.11032	1.94383	2.75937	1.66585	1.71405	1.05157	1.59302
ENSG00000253203	GUSBP3	5:69639458-69679259	5.16134	3.06739	3.36639	4.04179	3.46902	3.11301	2.60732
ENSG00000253730	RP11-893F2.13	17:50158332-50161276	0.116014	0.243702	0.0915845	0	0.570367	0	0.123563
ENSG00000253746	RP11-527N22.2	8:37405438-37406724	0.533355	1.00827	0.58936	0.168391	0.104877	0.113215	0.795385
ENSG00000253825	RP11-96A1.5	4:120035032-120040615	0	0	0	0	0	0	0.466612
ENSG00000253958	CLDN23	8:8701937-8704106	4.48708	2.35447	3.71553	3.46691	3.50951	3.34146	2.65781
ENSG00000254166	CASC19	8:127185634-127203222	0	1.23079	1.85212	0	0.691367	0.741772	1.99077
ENSG00000254271	RP11-131N11.4	10:60734341-60741828	0.170213	0	0.134478	0.269138	0	0.720555	0
ENSG00000254526	RP11-466I1.1	11:29159955-29266734	0	0	0.108454	0	0.27012	0	0.438664
ENSG00000254987	RP11-563P16.1	11:103675993-103895271	0.44519	0	0	0	0	0.118101	0.118548
ENSG00000255008	AP000442.4	11:59561145-59566074	0.499	0	0.00281127	0	0	0	0
ENSG00000255019	OR5D15P	11:55786963-55787905	3.50818	3.79785	3.11185	4.57888	2.42377	2.85704	2.80428
ENSG00000255129	RP11-839D17.3	11:113278436-113314437	0.783003	0	0.100075	0	0.293525	0.244766	0.373638
ENSG00000255135	RP11-111M22.3	11:76441337-76444656	15.6979	14.1592	13.1139	10.2015	17.0847	15.1999	14.3337
ENSG00000255248	RP11-166D19.1	11:122028354-122116323	0.22881	0.645474	0.569549	1.22082	0.178031	0.228383	0.368964
ENSG00000255362	RP11-619A14.3	11:76210955-76216025	0.838897	0	0	0.331865	0.41257	0.221555	0.668709
ENSG00000255455	RP11-890B15.3	11:130866253-130870247	1.45783	0.40794	0.706073	0.815845	0.943891	0.886133	0.909661
ENSG00000255524	NPIPB8	16:28637653-28658682	0.325434	0.506764	0.581506	0.596038	1.23656	0.431641	0.751389
ENSG00000255717	SNHG1	11:62851987-62855914	29.5001	53.0632	57.1647	53.151	70.2981	50.7153	88.9559
ENSG00000255769	GOLGA2P10	15:82472992-82513950	23.7423	16.0516	17.6377	21.1098	15.5312	17.9151	16.5717
ENSG00000255864	RP11-444D3.1	12:24213255-24562590	0	0.6458	0	0	0	0	0
ENSG00000255874	LINC00346	13:110863986-110870251	3.83311	4.05014	3.9722	4.08507	4.16232	2.61581	3.70502
ENSG00000256103	RP1-96H9.5	12:6270167-6270425	0	0	0.43666	0	0	0.288415	0.290465
ENSG00000256312	RP13-977J11.8	12:132190212-132190997	0.826455	0	0.326585	0.326925	0	0.873197	0.219617
ENSG00000256340	ABCC6P1	16:18571161-18598328	3.7393	1.79464	1.90823	1.1183	2.38712	1.61766	1.7274
ENSG00000256433	RP1-102E24.8	12:6393904-6396148	0.15298	0.481652	0.200914	0.521934	0.425759	0.244392	0.733937
ENSG00000256667	KLRAP1	12:10588062-10599669	1.10863	0.920346	1.28824	1.35155	1.53129	1.07566	2.1053
ENSG00000256683	ZNF350	19:51964342-51986856	2.30553	1.8128	1.38584	1.93545	1.79829	8.118	2.20016
ENSG00000257403	CTD-2547E10.3	16:21347138-21352138	0	0.60082	0.15066	0.908635	0.561291	0	0
ENSG00000257411	RP11-603J24.9	12:56101330-56109289	0.00407466	11.0393	0.00116043	0.002413	0.00464488	8.76073e-06	0.0206736
ENSG00000257526	RP11-20E24.1	12:76562293-76615567	0.211849	0.222567	0.502309	0	0.625123	0.895113	0.900588
ENSG00000257595	RP3-473L9.4	12:111369281-111403310	1.64909	0.34647	1.92701	0	2.26996	1.38684	0.773341
ENSG00000257800	FNBP1P1	2:74120679-74123218	1.36754	0.885029	0.987766	1.15557	0.962664	0.388437	0.68041
ENSG00000257987	LINC00935	12:48727434-48765786	0	0.454016	0	0	0	0	0.115114
ENSG00000258081	RP11-384J4.2	14:26836727-27160420	0.0554145	0.472471	0.182685	0.251295	0.0710863	0.124975	0.360387
ENSG00000258181	RP11-493L12.4	12:47248123-47257539	0	0	0.715326	0.469247	0	0.947331	0
ENSG00000258464	RP11-388E23.2	14:23729037-23729741	0.116673	0.245087	0.0920913	0.184234	0	0.486328	0.124264
ENSG00000258602	LINC01629	14:76959637-76965802	1.48184	4.66885	5.26313	5.84796	6.03577	4.1567	9.0199
ENSG00000258673	LINC01397	1:110082687-110109719	0.744761	0.223479	0.0839757	0	0.627629	0.338768	0
ENSG00000258689	LINC01269	14:70698697-70712153	0.301227	0.316346	0	0	0.592283	0.319793	0
ENSG00000258701	LINC00638	14:104821200-104823718	1.67722	0.90784	0.876324	1.3897	0.728296	1.0157	1.16709
ENSG00000258736	RP11-982M15.7	14:104653547-104655787	0.40508	0.278297	0.627625	0	0.268094	0.711197	0.282107
ENSG00000258748	CTD-2223O18.1	14:104137149-104137898	0.610405	0	0.361611	0.482389	0	0	0
ENSG00000258818	RNASE4	14:20684099-20701215	6.78991	0.926465	1.02965	1.07138	3.01678	2.0187	2.3774
ENSG00000258882	CTD-2277K2.1	14:61811973-61970319	0.530594	0.557253	0	0.502552	0.521668	0.450526	0.791278
ENSG00000258914	CTD-2134A5.3	14:103875054-103877478	0	0	14.2747	0	0	0	0
ENSG00000258947	TUBB3	16:89921391-89938761	4.63526	16.4492	12.1512	8.71734	9.98184	9.03238	10.8837
ENSG00000259017	RP11-561B11.6	14:35447002-35447625	0.528177	0	0.312803	0.208595	0.129853	0.559949	0.421804
ENSG00000259086	RP11-134E15.2	14:32271856-32272301	2.68682	2.82261	3.79488	3.99023	4.00401	1.9825	3.81225
ENSG00000259129	LINC00648	14:47764953-47795092	0.232586	0.0862136	0.0552342	0.688238	0	0.103122	0.016258
ENSG00000259245	RP11-684B21.1	15:36046081-36049529	0.0935441	0.196467	0.369072	0	0.183916	0	0.498297
ENSG00000259399	TGIF2-C20orf24	20:36574552-36612384	0.560223	2.93238	4.59789	0.63519	23.6255	10.6828	39.8587
ENSG00000259424	RP11-35O15.1	15:98646950-98647371	0.57265	0.90239	0.905475	0	0.844689	0.90449	0.910748
ENSG00000259445	RP11-276M12.1	15:81953302-81995666	0.909496	0.371346	0.535148	0.356407	0.668301	0.440214	0.855528
ENSG00000259473	RP11-96C21.1	15:70503906-70505928	0.699751	0	1.1049	0	0	0.727678	0
ENSG00000259527	LINC00052	15:87576928-87579866	0.879788	0.583142	0.547295	0.802001	0.795943	0.221943	0.493682
ENSG00000259658	RP11-89K11.1	15:101737098-101745710	4.71375	1.28228	2.48153	1.87172	3.45727	1.54989	2.75029
ENSG00000259726	CSPG4P11	15:84186751-84197384	1.78087	0.386933	0.56592	0.564586	0.587581	0.463052	0.53971
ENSG00000259762	RP11-158M2.4	15:85750335-85752901	0.136424	0	0.107733	0	0	0.433805	0.145254
ENSG00000259803	SLC22A31	16:89195760-89201664	11.51	6.89708	7.08633	12.4503	11.4272	8.93957	11.4199
ENSG00000259820	AC083843.1	8:134792019-134798272	0.386068	0.341142	0.576202	0.596919	0.791542	0.483696	0.989479
ENSG00000259867	RP11-525K10.3	16:80155052-80563135	0.308667	0.00280509	0.0105317	0.601556	0	0	0.391186
ENSG00000259884	RP11-1100L3.8	12:52058458-52059503	49.0756	5.33289	19.5768	7.33632	13.8455	11.3383	13.3852
ENSG00000259969	RP11-999E24.3	14:57993544-57994525	1.04203	0	0.0410782	0.08211	0.0511935	0.0554267	0.166595
ENSG00000259976	RP11-553L6.5	3:114314500-114316179	1.13261	1.01473	0.565997	1.39208	1.27537	1.14731	1.47254
ENSG00000259994	RP11-305E6.4	10:30302825-30306066	0.276069	0.233173	0.360714	0.29677	0.320074	0.588345	0.23932
ENSG00000260186	RP11-481J2.2	16:58421325-58462470	0.182108	0.382465	0	0.187984	0	0.0967046	0.097009
ENSG00000260366	CTD-2639E6.4	19:48926170-48926444	0.466074	0.489509	0.0460474	1.47948	0.915417	0.975349	0.589468
ENSG00000260404	RP11-384K6.6	4:118591772-118633729	2.3836	1.63788	1.91794	2.3197	2.42632	1.68724	3.07369
ENSG00000260418	RP3-406A7.7	6:136335713-136336087	0.676561	0.94772	0.356516	0	1.10909	0.714229	1.67706
ENSG00000260420	LA16c-444G7.2	16:88194280-88195217	0.807827	0	0.10632	0	0.132406	0.14272	0.143357
ENSG00000260604	RP1-140K8.5	6:3904919-3911979	0.155405	0.200698	0.374296	0.780726	0.686771	0.17202	0.407918
ENSG00000260614	RP11-491F9.1	16:49287429-49290227	0.267233	0	0.421703	0.281087	0	0.283841	0.0949056
ENSG00000260622	RP11-690I21.3	2:231810347-231810844	0.40524	0	0	0	0	0.71593	0
ENSG00000260630	SNAI3-AS1	16:88663297-88687186	1.91091	2.74569	1.18637	1.67147	1.11712	1.26988	1.45248
ENSG00000260710	RP11-616M22.7	16:1294550-1299166	0.631086	0.331481	0	2.00033	0.93073	0.995648	2.33966
ENSG00000260766	RP11-226L15.5	1:160024952-160026794	2.14085	0.836011	1.64774	1.45034	1.34486	1.88243	2.1232
ENSG00000260822	GS1-358P8.4	X:24545515-24550466	4.60663	1.80139	1.8076	2.11802	1.99941	3.0433	2.58486
ENSG00000260877	RP11-211G23.2	11:69371462-69372512	2.50762	2.63448	6.66716	5.77348	6.27822	5.77517	6.05398
ENSG00000260908	CTB-134H23.3	16:29053731-29108108	1.08548	87.2205	0.687063	0.549444	0.55814	0.804889	0.579977
ENSG00000260966	RP11-690D19.3	11:103050686-103055799	4.29643	1.75957	2.90468	2.41589	3.35915	2.88977	3.65622
ENSG00000261040	WFDC21P	17:60083565-60091885	0.865335	0.461318	0.520061	2.77257	1.95826	1.9946	1.24455
ENSG00000261087	KB-1460A1.5	8:101166804-101169629	0.421077	0.163658	0.307169	0.245502	0.27571	0.265866	0.715029
ENSG00000261101	RP4-545K15.5	X:101627867-101628523	0.443463	0.18627	0.279918	0.279869	0.435919	0	0.283487
ENSG00000261150	EPPK1	8:143857323-143878464	8.54001	4.85766	6.55688	5.42126	4.65773	3.37716	3.71675
ENSG00000261341	CTD-2568A17.1	19:50776140-50786210	0	1.39848	0.350824	0	0.871889	1.8288	0.468111
ENSG00000261534	RP11-244O19.1	9:121815673-121819452	0.629544	0.372347	0.261496	0.57652	0.292279	0.365937	0.317331
ENSG00000261662	RP5-1042I8.7	1:119909254-119910613	0.809772	0.332578	0.943466	1.71916	1.0722	1.12445	1.61388
ENSG00000261888	AC144831.1	17:83104254-83106910	2.59984	1.4341	1.78571	1.52167	1.47317	0.95883	1.99018
ENSG00000262468	LINC01569	16:4245824-4253789	0.877321	0.302311	0.698157	0.884417	1.97269	1.16665	1.12292
ENSG00000262814	MRPL12	17:81703356-81707526	45.0707	110.385	86.6174	83.4955	66.7213	95.0713	93.212
ENSG00000262921	RP11-141J13.3	17:4565751-4571760	0.835701	0	0.188504	0.377065	0.117393	0.633196	0.254297
ENSG00000263006	ROCK1P1	18:109064-122219	3.90274	4.16377	3.38985	4.93906	4.13301	4.24604	3.78056
ENSG00000263280	LA16c-325D7.2	16:2866347-2867618	0.606433	0.0909708	0.136704	0.41003	0.68126	0.0920271	0.553823
ENSG00000263422	AC005702.1	17:60042360-60042442	0	660.586	737.669	2474.43	1980.8	2995.8	280.675
ENSG00000263528	IKBKE	1:206470475-206496889	3.48109	4.87165	4.63346	6.15556	3.31307	4.84741	5.09127
ENSG00000263551	RP11-78F17.1	18:976588-1174823	2.00199	1.98704	1.39965	1.11725	1.80111	2.07163	1.31272
ENSG00000263627	PPP4R1-AS1	18:9615263-9619363	1.09811	1.61514	0.34718	0	0.864076	0.23191	0.466711
ENSG00000263820	AC005702.2	17:60042804-60042882	2887.62	945.784	0	1422.09	0	1444	0
ENSG00000263961	C1orf186	1:206037230-206102459	2.13997	0.474689	0.300617	0.475604	0.845268	0.989396	0.549747
ENSG00000264049	MIR4737	17:60043024-60043105	0	0	0	0	0	729.561	0
ENSG00000264164	RP11-640N20.6	17:32083178-32097065	0.224685	0	0.272324	0.272513	0	0.857381	0.183355
ENSG00000264222	RP11-757O6.1	18:14244624-14252140	0.550518	0.231277	0	0.521483	0.324767	0.116841	0.234556
ENSG00000264352	RN7SL602P	2:34809232-34809556	0.493188	0.399743	1.12486	2.73358	1.69303	0.767551	0.896338
ENSG00000264372	AC108519.1	4:9168228-9168294	0	0	0	0	2475.48	0	0
ENSG00000264391	RN7SL208P	5:76836899-76837195	0	0	0.301019	1.20774	0	0	0.402427
ENSG00000264569	RP13-650J16.1	17:82037904-82039380	0.728846	0.27753	0.293434	0.0741705	0.916725	0.606006	0.484736
ENSG00000264592	RN7SL131P	1:36191914-36192170	0.188502	0	0.446771	0	0	0	0
ENSG00000264734	RP11-260A9.6	17:26989188-26999941	0.496107	0	0	0.452134	0	1.30805	0
ENSG00000264920	RP11-6N17.4	17:47891254-47895812	5.48675	7.04465	3.26908	5.10312	4.34025	5.36194	3.55414
ENSG00000265078	RN7SL664P	3:48094800-48095105	0	0.742906	0	0	0.347582	0	0
ENSG00000265107	GJA5	1:147756198-147773362	8.36597	4.69946	7.61894	12.5201	10.6855	6.32357	9.33047
ENSG00000265388	RN7SL391P	12:6344553-6344837	0.211706	0	0.0167354	0	0	0.665453	0
ENSG00000265638	AC005702.3	17:60042693-60042772	1318.14	864.053	1293.71	5193.18	0	2631.96	1094.63
ENSG00000265743	RP11-848P1.3	17:30964934-30965500	1.13809	0.597827	0.449669	0	0.932861	0.601691	1.00857
ENSG00000265787	CYP4F35P	18:14337422-14342525	0.525212	0.272058	0.46385	0.264919	0.821697	0.772496	0.727991
ENSG00000265936	RP11-563H6.1	18:67375132-67375305	5.14239	2.69394	1.00469	0	2.06831	7.40148	9.99168
ENSG00000265972	TXNIP	1:145992434-145996600	265.482	52.9677	66.837	77.979	93.2797	87.7331	86.3321
ENSG00000265984	RP11-699A5.2	18:21240674-21241371	0.17452	0.183344	0.137888	0	0.171656	0.738641	0
ENSG00000266010	GATA6-AS1	18:22166897-22168968	1.2401	0.36732	0.36064	0.468444	1.62602	0.261546	0.882379
ENSG00000266013	CTD-2206N4.2	17:39026714-39027110	0.774616	0.406834	0.20413	1.22861	0	0.406298	1.22779
ENSG00000266224	AL158077.1	9:19829752-19829847	0	0	153.371	0	0	0	0
ENSG00000266272	Z97632.1	X:136487291-136487392	126.36	0	0	189.131	0	121.831	0
ENSG00000266553	RN7SL356P	14:76967517-76967765	0	0.653675	0.491649	0	0.610409	0	0.652984
ENSG00000267011	CTB-50L17.16	19:4457961-4471493	0.0360161	0.172971	0.0625792	0	0.597199	0.00763235	1.01098
ENSG00000267073	AC005256.1	19:1748055-1748745	4.82703	1.35946	1.1683	2.01395	0.363193	1.17157	0
ENSG00000267194	RP1-193H18.2	17:69551357-69553861	0.799286	0.111838	0.195919	0.195737	0.104673	0.359541	0.132567
ENSG00000267247	RP11-64C12.6	18:12230410-12231573	0.843719	0.590862	0	0.666576	0.414881	0	0.14971
ENSG00000267289	CTD-2623N2.11	19:9834078-9835013	0.44231	0	0.116294	0.23251	0.0724517	0.0783511	0.0785541
ENSG00000267303	CTD-2369P2.12	19:10315470-10320678	3.68458	3.77942	4.93155	3.3037	10.2149	7.48074	10.6821
ENSG00000267364	RP11-47L3.1	17:35313501-35324900	1.92973	0	0.710053	0.373795	0.705803	0.670807	0.285536
ENSG00000267519	CTD-3252C9.4	19:13834515-13836289	3.84273	1.90746	3.33621	3.72062	4.95069	3.71924	5.51344
ENSG00000267710	AC006116.20	19:56272768-56310450	0	0	0.15706	0.513822	0	0.12555	0
ENSG00000268062	TOP1P1	1:171345104-171345307	0	0	0	2.00055	1.22595	0	0
ENSG00000268375	CTD-2568A17.8	19:50792684-50793584	0	0	0	0	0.530276	0	0.568178
ENSG00000268510	IFNL3P1	19:39236432-39237293	0	0.420154	0.421136	0.210631	0.131117	0.282681	0.141966
ENSG00000268536	AC005523.3	19:4785119-4791207	0.182192	0.382811	0.431882	0.864449	0	0.770842	0
ENSG00000268601	AC115522.3	19:43794308-43795658	0.339412	0.237655	0.178618	0.357266	0	0.480176	0.482017
ENSG00000268621	AC006262.5	19:46189165-46203083	17.5716	11.8608	18.551	38.6364	43.3734	30.2495	27.1837
ENSG00000268723	CTC-444N24.9	19:57317207-57317562	0.627475	1.05474	1.48811	0.198715	1.11084	0.397012	0
ENSG00000268790	CTC-429P9.4	19:16577641-16660115	8.53087	0.394349	1.00162e-08	2.51949	2.09263	1.06008	0.385334
ENSG00000268903	RP11-34P13.15	1:135140-135895	4.67236	3.49855	4.15399	5.449	5.68063	4.68694	7.61171
ENSG00000269038	AP001462.6	11:64778953-64779405	0	0.499409	0.125177	0.250494	0.155855	0.335586	0.33729
ENSG00000269313	MAGIX	X:49162563-49168483	0.539288	1.4287	0.472973	1.17852	0.879348	1.54311	1.0136
ENSG00000269713	NBPF9	1:149054026-149103561	11.6688	9.27843	10.7264	11.2539	12.2508	8.43434	12.2797
ENSG00000269743	SLC25A53	X:104099213-104157027	3.51086	5.52944	2.97577	3.53221	3.76947	3.90393	3.91081
ENSG00000269926	RP11-442H21.2	10:72274914-72275980	19.7131	13.4456	16.1398	28.999	31.2789	26.8363	40.3446
ENSG00000269947	RP11-849F2.9	17:8277762-8278436	0.0853719	0.17929	0.404129	0.538726	0.671331	0.090692	0.545766
ENSG00000269949	RP11-738E22.3	4:56960926-56961373	0	0.678914	0.510526	0.255413	0.0105938	0.513157	0.343866
ENSG00000269973	RP11-95D17.1	2:9936359-9939590	1.13268	0.708911	0.846745	0.680565	0.637611	1.22375	0.93642
ENSG00000270069	MIR222HG	X:45745210-45770274	1.05626	1.03596	1.57567	1.18623	2.34693	1.35454	3.55358
ENSG00000270103	RNU11	1:28648599-28648730	29.677	0	0	0	13.7102	0	42.3421
ENSG00000270182	RP1-170O19.24	7:27158343-27158976	0.466657	0.0980099	0	0.294548	0	0.0991138	0.497165
ENSG00000270231	NBPF8	1:120436352-120467739	8.81043	6.73045	8.12874	9.82524	9.88021	6.88255	10.608
ENSG00000270369	RP11-144G6.13	10:47484456-47484754	1.1232	0.655469	1.92399	0.593757	0.551941	1.04782	2.17687
ENSG00000270460	RP11-796E10.1	2:173811075-173811392	1.61267	0	1.02003	1.53362	0.317102	0.339145	0.683124
ENSG00000270522	RP11-168P13.1	13:43787590-43787852	0	0	0	0	0.518697	0	0
ENSG00000270577	RP5-1147A1.1	7:40115684-40115943	0	0	0.431753	0	0.536237	0	0
ENSG00000270802	AC005776.1	19:15338947-15339237	0.401053	0	0.634104	1.27237	1.18222	0.42052	2.54156
ENSG00000270808	RP11-574K11.27	10:73740537-73740823	0.831426	0	0	1.31906	0.408428	0.435679	2.19431
ENSG00000270813	NANOGNBP3	X:101337724-101338289	0.1104	0.463799	0.0871436	0	0.217094	0.117153	0.587964
ENSG00000270861	KB-1589B1.4	8:97853020-97853253	0	0	0.600518	0	0	0	0
ENSG00000270876	ZNF30-AS1	19:34923298-34926812	0.475303	0	0.150027	0.150011	0.280351	0	0
ENSG00000271040	RP5-933K21.3	6:157323963-157324477	0.383805	0	0	0	0	0.67828	0
ENSG00000271105	SCML2P2	16:25069569-25070109	0.946832	0	0.0934357	0.373795	0.116377	0.627751	0.756307
ENSG00000271227	RP1-152L7.8	6:52688660-52688998	0	0	0	0	0.822782	0	0
ENSG00000271267	RP11-29H23.7	1:155566049-155566306	0	0.587078	0.441665	0	0.548515	0	1.17499
ENSG00000271367	RP3-483K16.4	6:53350157-53350705	0.231374	0.48603	0	0	0	0	0.123216
ENSG00000271420	RP5-1057J7.7	1:23378379-23379029	0.269573	0.125812	0.0709004	0	0.0883303	0.0954391	0.622283
ENSG00000271727	RP11-532F6.4	6:711532-750729	0.713102	0	0.14086	0.281933	0	0	0
ENSG00000271732	RP5-1182A14.5	1:16617390-16617729	0	0	0	0.877833	0.27249	0	0
ENSG00000271737	CTB-113I20.2	5:134005146-134005562	0.551418	0	0.435715	0.290712	0.723168	0.58321	1.36848
ENSG00000271882	KB-1410C5.5	8:101208147-101208558	0	0.197473	0.297063	0	0	0	0.599699
ENSG00000271926	CTD-2376I4.1	5:72953634-72954274	0	0	0	0.579841	0.180619	0	0.0978766
ENSG00000271991	RP11-79O8.1	2:19902024-19902569	0.116673	0.245087	0.0921059	0	0.344166	0	0.497056
ENSG00000272057	CTB-40H15.4	5:14872331-14872713	0.864898	0	0	0	0.212678	0.228356	0
ENSG00000272068	RP11-284F21.9	1:156637782-156641004	7.31768	1.82021	3.01058	4.15952	5.77618	3.17677	4.37813
ENSG00000272081	CTD-2376I4.2	5:72955205-72955699	0.272848	0.28661	0.646401	0.215539	0.402491	0.144602	0.72627
ENSG00000272086	CTD-2186M15.3	5:32174470-32175272	2.02264	1.76962	2.3928	0.956735	3.44542	2.00697	2.22731
ENSG00000272088	RP11-168F9.2	1:3487245-3487627	0.432449	1.13582	0.341801	0	1.27607	0.228356	1.83815
ENSG00000272142	RP11-428J1.5	6:5029971-5043449	2.90524	1.73692	0.947338	1.92939	0.767886	1.37948	1.77212
ENSG00000272236	XXbac-BPG170G13.32	6:29751964-29752207	0	0	0	0	0.650324	0	0.695153
ENSG00000272308	RP11-231G3.1	5:60866456-60866935	0.861372	0.452424	0.340148	0.453716	0.235316	0.91271	0.152834
ENSG00000272366	RP11-573G6.10	10:22340376-22340615	0	0	1.1049	0	0.685655	0	0
ENSG00000272398	CD24	6:106969830-106975627	893.747	525.15	574.224	448.398	421.447	526.529	253.619
ENSG00000272417	CTD-2199O4.6	5:10203599-10204040	0.827229	0	0.130705	0.784718	0	1.05079	0.704195
ENSG00000272440	RP11-379F4.6	3:158695366-158695581	1.00911	0	0	0	0	1.04302	0
ENSG00000272444	RP11-1017G21.6	14:101952415-101953063	0.180506	0.284324	0.213638	0.142403	0.798472	0.0958572	0.576939
ENSG00000272462	U91328.19	6:25992661-26001775	0.860121	0.689231	0.826087	0.56339	1.10838	0.8972	1.08946
ENSG00000272523	LINC01023	5:108727824-108728260	0.506472	0	0.666893	0.800799	0.830255	0.893398	0.538887
ENSG00000272524	RP11-254F7.4	2:10120733-10121065	0.870551	0.304849	0	0	0.856056	0.305513	0.615271
ENSG00000272645	GTF2IP20	1:223951393-223992594	6.0619	4.22091	4.0738	5.93126	6.27701	5.04356	8.1397
ENSG00000272663	RP11-191L17.1	2:48440042-48440597	0.4538	0.238312	0.268669	0.358256	0.334649	0	0.483347
ENSG00000272848	RP1-137D17.2	6:169426419-169427069	0.269573	0.188719	0.567203	0	0.264991	0	0.47868
ENSG00000272911	RP11-74E22.6	17:2688472-2688960	0	1.13238	0.284093	0.56977	0	0.754642	0
ENSG00000273033	RP11-67L2.2	3:122886940-122892416	3.93128	0.717422	0.862926	1.39393	1.33526	1.31665	0.988639
ENSG00000273038	RP11-479G22.8	10:32887254-32889311	0.396394	0.23111	0.537913	0.138694	0.605657	0.539521	1.05656
ENSG00000273091	AP000255.6	21:31735731-31736407	0.255055	0	0.402452	0	0.334274	0.0903177	0.271754
ENSG00000273117	AC144652.1	7:155295917-155297541	1.922	1.14407	1.17554	1.26493	1.35259	0.549861	1.43738
ENSG00000273142	RP11-458F8.4	7:66902856-66906297	1.54177	1.12722	1.58296	1.53168	1.91139	1.40054	2.50636
ENSG00000273143	RP11-525A16.4	10:110428839-110496204	0.417579	0	1.1038	0.439859	0.273779	0	0.444585
ENSG00000273165	RP11-1057B6.1	2:31852975-31853423	0	0.169067	0	0.508828	0.158287	0.170391	0
ENSG00000273203	AC006946.16	22:17067820-17070675	0.925181	0.275082	0.704598	0.461194	0.954107	0.936481	0.986471
ENSG00000273265	RP11-353K11.1	2:96812238-96813657	0	0	0.437657	0	0	0.195261	0.196362
ENSG00000273338	RP11-386I14.4	1:78004345-78004554	24.6937	9.42201	11.4913	8.92608	18.6216	12.7383	13.9576
ENSG00000273342	KB-1440D3.14	22:21640843-21641284	0	0	0	0.523145	0	0.350263	0
ENSG00000273406	RP11-114O18.1	1:120076615-120077091	0.265979	0.0508009	0.744794	0.305686	0.90366	0.973531	0.33463
ENSG00000273424	CTA-223H9.9	22:41430933-41431375	0.329572	0	0.390547	0.260526	0.324155	0.174438	0.701398
ENSG00000273493	RP11-80H18.4	3:58329964-58330118	0	0	3.80317	0	0	0	0
ENSG00000273706	LHX1	17:36936784-36944612	1.69499	3.92768	2.23474	2.46503	2.24669	1.6697	4.38386
ENSG00000273748	AL592183.1	GL000219.1:54223-83311	8.20676	5.14922	8.55619	3.87304	9.76861	8.02107	6.51409
ENSG00000273763	RP11-420C9.1	2:65203570-65203813	0	0	0	3.16234	0.650324	0	0
ENSG00000273980	RP13-49I15.6	10:133257143-133257551	0.190551	0.800756	0.602312	0	0.562282	0.604425	0.405269
ENSG00000274012	Metazoa_SRP	14:49862549-49862849	116.854	253.056	85.6537	59.5555	97.6745	129.212	93.9313
ENSG00000274070	GATSL2	7:74964817-75024798	2.99993	1.79913	1.8914	1.92373	1.83588	2.50911	1.15425
ENSG00000274135	Metazoa_SRP	7:66915062-66915334	0.600367	0.998889	0.583549	0	0	0.497433	0
ENSG00000274162	SNX18P1Y	Y:11178305-11178816	0	0.542598	0.10197	0	0.126995	0.410782	0
ENSG00000274180	NATD1	17:21238869-21253410	3.25125	1.15948	0.989505	1.7043	1.76963	1.28339	1.62582
ENSG00000274191	RP11-324E6.10	12:122634129-122634673	0	0.122893	0	0.554283	0.575246	0.248254	0.747704
ENSG00000274213	RP11-670E13.6	17:56914185-56914533	0	1.10019	1.03487	0.414626	3.60476	1.10383	1.66687
ENSG00000274286	ADRA2B	2:96112874-96116245	1.29159	0.298177	0.356129	0.264294	0.279071	0.523	0.358068
ENSG00000274422	LL22NC03-2H8.5	22:22283927-22287220	2.06558	1.26441	2.10711	2.83453	3.00399	3.83773	5.13908
ENSG00000274512	TBC1D3L	17:37977971-38068651	1.76383	1.51909	1.42362	1.85274	2.12	1.45387	3.06602
ENSG00000274798	CTD-2129N1.1	15:40874432-40874595	0	0	0	0	3.3829	0	0
ENSG00000274997	HIST1H2AH	6:27147128-27147515	0.843125	0.664336	0	0	0	0.445322	0.672059
ENSG00000275216	RP11-54H7.4	13:109269633-109273838	6.62785	11.267	16.8105	25.7764	21.0749	13.3283	22.8356
ENSG00000275538	RNVU1-19	1:120850818-120850985	24.7094	9.70487	7.22569	4.90418	20.8027	15.635	6.22706
ENSG00000275542	RP11-455O6.9	17:81339182-81339691	0.519829	0	0.102616	0.205287	0.255597	0.137788	0.276768
ENSG00000275549	C9orf173-AS1	9:137250218-137253497	0.871088	0.228553	0.171611	0.171469	0.695225	0.376865	0.638467
ENSG00000275613	CTD-3194G12.2	17:36722582-36726340	0.156658	0.329146	0	0.495261	0	0	0
ENSG00000275630	RP6-65G23.5	14:70822003-70823984	2.11706	1.77893	1.67354	0	1.66386	2.21818	0.893751
ENSG00000275636	RP11-521C20.5	15:40078891-40079347	0	0	0	0.493381	0	0	0.332205
ENSG00000275714	HIST1H3A	6:26020489-26020900	1.1278	0.987363	0.594126	0	0.739538	0.39753	1.5992
ENSG00000275773	RP11-343D24.2	6:60723147-60723898	1.90957	0	0	2.07552	0.160916	0.344151	0.346612
ENSG00000276019	HULC	6:8653557-8653797	1.08477	0	1.09012	0	2.02955	0	0.631514
ENSG00000276070	CCL4L2	17:36210923-36212878	0.119383	0.125392	0.094249	0	0.0879125	0.460136	0
ENSG00000276141	WHAMMP3	15:22664358-22686213	2.82415	1.75459	1.59479	2.23396	2.91898	1.58585	2.3628
ENSG00000276188	RP11-173P15.10	12:120709111-120709523	0	0.786332	0.295723	0	0	0	0
ENSG00000276245	AC011841.5	GL000205.2:29935-30018	0	0	0	0	518.39	0	0
ENSG00000276331	AC092275.1	16:85160294-85160381	0	0	312.077	0	0	0	0
ENSG00000276427	IGLL4P	22:20632618-20632751	0	0	0	0	12.2893	0	12.6564
ENSG00000276445	LLNLR-268E12.1	19:39812971-39813555	0	0.110309	0.0828993	0.331596	0.309796	0	0.447538
ENSG00000276644	DACH1	13:71437965-71867192	0.912131	0.168825	0.126629	0.0694829	0.173693	0.192933	0.234483
ENSG00000276851	RP5-875H18.9	17:50094064-50094647	0.631817	0.884739	3.32449	2.16092	1.55296	1.22946	2.57994
ENSG00000276957	RP11-29B2.6	13:102593337-102593873	0.838137	0	0.0945274	0	0.117735	0.127006	0
ENSG00000276989	AC009060.1	16:70216894-70217003	0	0	0	0	0	63.8372	0
ENSG00000277224	HIST1H2BF	6:26199519-26200715	1.65427	2.06218	1.00016	0.902758	0.764028	1.35047	0.552651
ENSG00000277459	RP11-732A21.3	11:102109826-102110457	9.37578	11.4211	8.36013	8.58104	4.3319	3.6839	4.4949
ENSG00000277511	CTD-2095E4.5	17:32127594-32128454	0.492452	0	0.339795	0.873353	1.20981	0.720048	0.524822
ENSG00000277720	RP1-34B20.19	6:26219044-26219240	0	0	0	0	0	1.49028	0
ENSG00000277775	HIST1H3F	6:26250194-26250605	0.187966	0	0.148532	0.594631	0.739538	0	0.599699
ENSG00000277901	RP5-851M4.1	20:23320957-23325352	0	0	0	0	0	0.547116	0
ENSG00000277950	Metazoa_SRP	22:20070715-20070965	0	0	0.47971	0	0.595626	1.26591	0
ENSG00000277991	CH507-338C24.1	21:7669396-7681742	8.62917	10.4162	10.2471	9.39731	10.5209	9.30604	9.13176
ENSG00000278035	RP11-234K24.6	20:36233850-36234297	0.161564	0	0	0.510826	0.476719	0.171052	0.343866
ENSG00000278084	RP11-87C12.6	12:121874192-121874337	7.19334	0	5.53989	0	0	0	0
ENSG00000278099	U1	1:144551778-144551943	0	0.246558	0	10.4633	0	0	0
ENSG00000278153	RP4-585I14.3	20:13368290-13368703	0	0	0	0.294639	0.183226	0	0.594347
ENSG00000278244	UPF3BP3	X:119815163-119815307	0	0	5.79739	0	7.10296	7.48847	0
ENSG00000278313	RP11-1006G14.5	15:72604398-72605008	0	0	0	0	0.519346	0	0
ENSG00000278484	RP11-95I16.6	10:120984965-120985596	0.562547	0.0984581	0.0739834	0.147949	0.46084	0	0.0998867
ENSG00000278504	UPF3BP2	X:119822905-119823043	20.2269	21.0833	23.2185	15.8721	37.8284	49.9594	0
ENSG00000278546	RP1-41C23.4	17:31560131-31560573	0	0.34623	0	0.521052	0.162078	0.174438	0.17535
ENSG00000278619	MRM1	17:36601571-36608971	1.38147	5.38201	4.2099	4.72354	3.27128	4.27474	4.32928
ENSG00000278642	RP11-159D12.11	17:57955964-57956143	0	0	0	0	2.10533	0	0
ENSG00000278654	RP11-434C1.4	12:11500498-11501022	0	0.521289	0.195921	0.391919	0.244012	0	0.132131
ENSG00000278914	KB-1517D11.3	8:98391400-98391514	0	0	0	0	0	43.9276	0
ENSG00000278916	CEP83-AS1	12:94460002-94462484	0.358653	0.169369	0.310833	0.225851	0.281811	0.22926	0.611843
ENSG00000279117	CTD-2562J17.6	11:75260128-75262466	10.5953	3.61486	4.65902	4.36855	5.54482	5.74903	4.83565
ENSG00000279140	RP11-477I4.4	14:104815448-104815753	0.707219	0.742906	1.11829	0	0.695165	0	0
ENSG00000279141	LINC01451	9:136612023-136617181	2.49324	0.208398	0.529011	0.210967	0.464477	0.601481	0.279545
ENSG00000279268	RP11-628M2.1	15:65226471-65226697	0	0	0.332976	0	1.23902	0	1.76058
ENSG00000279368	RP1-80N2.4	6:6685147-6686984	0.399508	0.628916	0.550917	0.629083	0.662214	0.186155	0.425932
ENSG00000279453	RP3-425C14.4	6:122436788-122439223	1.55623	0.518763	1.03861	0.980002	0.989039	1.20932	1.28838
ENSG00000279838	RP4-635A23.6	1:185292383-185294372	1.48563	0.335808	0.61232	0.647772	0.987795	0.608621	0.85288
ENSG00000280027	RP11-44F14.10	16:53391088-53392473	2.20412	0.903666	0.922868	0.86793	0.845808	1.72325	1.65211
ENSG00000280037	RP11-434P11.1	2:73761268-73761781	0.128335	0.471807	0	0	0	0	0
ENSG00000280099	RP11-33E12.2	1:85152486-85154203	7.67667	2.26152	3.29002	3.01158	3.36024	3.70043	3.50343
ENSG00000280237	MIR4697HG	11:133896437-133901601	0.784414	0.381228	0.370742	0.740721	0.64061	0.396019	0.766004
ENSG00000280331	RP11-545D22.1	11:36510360-36510537	8.41901	0	1.79669	0	0	0	0
ENSG00000280416	RP11-361L15.3	16:66944659-66945096	11.2652	8.83186	8.23578	9.83621	10.7494	8.1861	10.7341
ENSG00000280560	LINC01374	10:89853905-89914948	0	0.581882	0.145886	0	0.181596	0.390521	0.196362
ENSG00000280665	RP11-35J6.1	6:168820422-168820656	2.50032	2.36269	1.52237	1.19209	3.08537	1.81807	2.84877
ENSG00000281162	LINC01127	2:101962055-101987167	0.21495	0.547037	0.554607	1.33834	0.738721	0.461648	1.65779
ENSG00000281205	LINC00950	9:35858737-35865518	0.68533	0.0588372	0.0883358	0.0784382	0.195791	0.212508	0.139516
ENSG00000281379	SEPT14P19	19:186372-195696	4.67943	2.86394	3.65266	1.22559	2.76637	2.12188	3.51427
ENSG00000281383	CH507-513H4.5	21:8254591-8255514	3644.12	2783.26	2508.59	1675.97	1812.88	3283.7	1662.97
ENSG00000281706	LINC01012	6:27694034-27710222	1.44071	1.79764	1.21599	3.07194	1.845	3.1609	1.48294
ENSG00000281884	Metazoa_SRP	7:23489552-23489827	3.86864	2.90804	3.19759	5.85923	5.04173	3.56924	5.95889
ENSG00000282458	WASH5P	19:60950-71626	17.5257	12.7942	14.9149	20.0035	20.7337	14.7559	27.0037
ENSG00000282508	LINC01002	19:198263-239440	29.0722	15.6942	22.423	29.95	27.7248	20.2255	35.1935
ENSG00000000003	TSPAN6	X:100627108-100639991	37.0861	25.066	29.3872	28.4514	31.0345	29.353	27.8345
ENSG00000000005	TNMD	X:100584801-100599885	0	0	0	0	0	0	0
ENSG00000000419	DPM1	20:50934866-50958555	121.869	148.518	140.746	141.486	153.992	144.776	138.291
ENSG00000000457	SCYL3	1:169849630-169894267	4.23498	3.95386	3.76768	3.3679	3.69675	3.27382	2.7653
ENSG00000000460	C1orf112	1:169662006-169854080	12.9579	18.6242	16.3815	14.6856	13.2738	12.1154	10.8522
ENSG00000000938	FGR	1:27612063-27635277	0.0437257	0	0	0.0710048	0.044276	0	0
ENSG00000001036	FUCA2	6:143494810-143511690	23.6665	28.0661	34.4325	33.4737	34.4115	33.4057	31.5228
ENSG00000001084	GCLC	6:53497340-53616970	26.433	32.8073	26.5733	27.2396	25.4293	22.1548	20.4595
ENSG00000001167	NFYA	6:41072944-41099976	23.3894	22.905	20.8933	20.9364	18.3328	17.2877	17.3063
ENSG00000001460	STPG1	1:24356998-24416934	9.25791	9.63606	9.44565	10.1239	11.4524	9.2263	9.05065
ENSG00000001461	NIPAL3	1:24415793-24472976	12.5264	8.64771	8.2658	8.5541	10.0014	8.57568	9.5394
ENSG00000001497	LAS1L	X:65512581-65534775	23.7303	33.7747	35.3742	33.6198	31.5721	31.6014	32.3303
ENSG00000001561	ENPP4	6:46129992-46146699	12.2272	6.47316	7.96368	8.27437	8.06571	6.51568	5.60596
ENSG00000001617	SEMA3F	3:50155044-50189075	9.37086	7.12922	6.88261	7.78398	6.19973	5.7733	5.2226
ENSG00000001626	CFTR	7:117465783-117715971	0	0.0145039	0	0	0.00678714	0.0147328	0.00736962
ENSG00000001629	ANKIB1	7:92246233-92401384	27.5564	26.1649	17.8462	18.4175	17.4985	13.8811	13.5918
ENSG00000001630	CYP51A1	7:92112150-92142952	38.2123	31.4216	34.0418	27.2332	31.2154	28.531	25.8303
ENSG00000001631	KRIT1	7:92198968-92246166	27.908	22.5317	18.1362	17.5163	20.084	17.7473	18.5797
ENSG00000002016	RAD52	12:912076-990053	10.7988	6.11451	4.95086	8.89874	5.52	6.37082	7.30701
ENSG00000002079	MYH16	7:99238793-99311130	0.503268	0.10589	0.299866	0.334615	0.296726	0.414094	0.0789133
ENSG00000002330	BAD	11:64269829-64284704	20.9062	24.081	19.4275	22.095	19.5941	24.6005	24.2889
ENSG00000002549	LAP3	4:17577191-17607972	7.73401	14.7488	13.0314	12.9393	10.0348	10.4831	10.3171
ENSG00000002586	CD99	X:2691178-2741309	51.0283	39.3002	35.36	41.3618	45.8957	53.8419	56.9753
ENSG00000002587	HS3ST1	4:11393149-11429765	0.0942595	0.428261	0.229489	0.418371	0.108669	0.297142	0.27738
ENSG00000002726	AOC1	7:150824626-150861504	0.274483	0.059449	0.0430468	0	0.129274	0.0788857	0.169926
ENSG00000002745	WNT16	7:121325366-121341104	0.0555814	0	0.0547354	0.0623652	0	0.0296126	0.0889686
ENSG00000002746	HECW1	7:43112598-43566001	20.1142	19.7469	14.2341	16.7671	14.9204	16.7201	13.8646
ENSG00000002822	MAD1L1	7:1815792-2233243	28.2227	25.0654	24.3211	22.928	28.4811	26.8729	21.4721
ENSG00000002834	LASP1	17:38869858-38921770	109.157	154.59	144.377	134.01	129.32	132.087	123.775
ENSG00000002919	SNX11	17:48103356-48123074	11.0015	11.6559	9.11394	10.2935	10.8161	9.48929	9.49211
ENSG00000002933	TMEM176A	7:150800402-150805120	0.0935975	0	0	0	0.0913327	0	0
ENSG00000003056	M6PR	12:8940362-8949955	154.859	176.413	170.916	170.814	167.274	154.326	158.832
ENSG00000003137	CYP26B1	2:72129237-72148038	5.33666	3.9303	6.31382	6.62437	7.48262	5.44027	7.84389
ENSG00000003147	ICA1	7:8113183-8262687	15.6777	14.7785	13.9631	19.8907	18.7635	15.6784	13.8578
ENSG00000003249	DBNDD1	16:90004864-90020128	1.99699	2.01453	1.62132	2.03101	2.49984	1.95021	2.56673
ENSG00000003393	ALS2	2:201700553-201781189	19.6232	16.6012	16.3246	15.1913	14.8907	11.4294	15.1993
ENSG00000003400	CASP10	2:201182880-201229406	5.28072	5.06287	3.96876	3.70611	4.36996	3.85492	3.77062
ENSG00000003402	CFLAR	2:201116103-201176687	2.77845	3.43625	4.29086	5.22878	5.48823	4.44357	5.52655
ENSG00000003509	NDUFAF7	2:37231630-37253403	16.8745	22.3954	20.5646	20.4662	22.5104	20.8677	22.0291
ENSG00000003756	RBM5	3:50088907-50119021	26.0088	20.2063	22.4186	20.9807	20.0538	17.8883	26.7523
ENSG00000003987	MTMR7	8:17298029-17413528	0.22448	0.32815	0.27927	0.300327	0.396077	0.238628	0.512964
ENSG00000004059	ARF5	7:127588344-127591705	157.895	160.878	135.876	146.707	128.687	150.545	115.043
ENSG00000004139	SARM1	17:28364355-28404049	0.379175	0.110622	0.0386624	0.0446937	0.195796	0.100695	0.0778803
ENSG00000004142	POLDIP2	17:28347176-28357522	48.1599	60.8568	53.0506	50.9645	49.7731	50.9798	49.1464
ENSG00000004399	PLXND1	3:129555174-129606818	20.226	10.472	17.7172	20.3212	20.0829	17.9804	20.4193
ENSG00000004455	AK2	1:33007939-33080996	90.2299	153.013	135.306	121.482	123.732	122.175	122.787
ENSG00000004468	CD38	4:15778274-15853230	0.0277553	0	0.00915334	0.0437085	0	0	0.0375844
ENSG00000004478	FKBP4	12:2794952-2805423	36.5842	70.1362	62.1176	59.0429	45.3907	59.3271	55.4203
ENSG00000004487	KDM1A	1:23019447-23083689	156.389	215.285	192.894	172.479	161.982	190.289	181.88
ENSG00000004534	RBM6	3:49940006-50100045	18.5942	15.177	16.3434	17.3463	18.2546	18.9249	17.9334
ENSG00000004660	CAMKK1	17:3860314-3894891	1.17977	1.00867	0.906355	0.994087	0.981702	1.07822	1.10271
ENSG00000004700	RECQL	12:21468910-21501669	28.1667	26.7715	24.7843	26.981	25.7531	21.4614	17.8667
ENSG00000004766	VPS50	7:93232339-93361121	11.7819	14.2621	11.9861	11.5993	10.3211	10.3506	8.99163
ENSG00000004776	HSPB6	19:35754567-35758079	19.9902	26.7369	22.6342	31.8425	24.1031	23.9441	19.8231
ENSG00000004777	ARHGAP33	19:35774531-35788822	4.9131	2.31502	2.76802	2.21359	3.39345	4.38567	2.9084
ENSG00000004809	SLC22A16	6:110424686-110476641	0	0	0	0	0	0	0
ENSG00000004838	ZMYND10	3:50341109-50346852	1.58136	1.01451	1.52352	1.56979	1.60994	1.49079	1.67707
ENSG00000004846	ABCB5	7:20615206-20777038	0.231568	0.0792681	0.0760436	0.309882	0.178369	0.129039	0.118139
ENSG00000004848	ARX	X:25003693-25015948	0	0	0	0	0	0.016301	0.0163125
ENSG00000004864	SLC25A13	7:96120219-96322147	20.7722	27.5699	25.9624	27.249	18.7479	19.8803	15.7187
ENSG00000004866	ST7	7:116953237-117230103	11.7766	10.3188	12.2757	12.694	12.1443	11.7212	12.0678
ENSG00000004897	CDC27	17:47117702-47189422	45.7005	57.5762	46.1922	43.016	47.4569	42.1289	40.5921
ENSG00000004939	SLC4A1	17:44248384-44268141	0.0717295	0	0.0426774	0	0.03469	0.0525109	0.0429578
ENSG00000004948	CALCR	7:93424486-93574730	0.119558	0.061865	0.0753484	0.0506511	0.140147	0.089183	0.100034
ENSG00000004961	HCCS	X:11111300-11123078	16.9183	29.5917	25.1668	25.387	24.8218	27.8057	29.1551
ENSG00000004975	DVL2	17:7225340-7234545	16.0756	13.3228	13.4816	14.122	13.897	13.5625	15.0415
ENSG00000005007	UPF1	19:18831937-18868236	25.8677	29.2311	28.4461	29.8931	27.33	26.8447	29.3458
ENSG00000005020	SKAP2	7:26667061-26995239	61.7236	50.0099	48.7343	46.2662	44.9341	30.394	26.439
ENSG00000005022	SLC25A5	X:119468399-119471319	259.312	388.429	322.298	283.609	264.538	319.538	278.475
ENSG00000005059	CCDC109B	4:109560204-109688726	8.56249	7.99288	5.95655	6.59051	7.18919	8.57547	6.78938
ENSG00000005073	HOXA11	7:27181509-27185223	2.88227	4.32112	5.05782	4.22217	5.30947	4.02622	4.54763
ENSG00000005075	POLR2J	7:102473117-102478907	60.4436	77.5412	63.5256	60.8876	66.0697	67.4553	64.4124
ENSG00000005100	DHX33	17:5440911-5469060	5.11153	10.1036	8.10912	7.74627	7.20782	6.22841	6.72751
ENSG00000005102	MEOX1	17:43640387-43661954	0.311347	0.364076	0.308739	0.510747	0.640094	0.556771	0.594421
ENSG00000005108	THSD7A	7:11370356-11832198	0.0275552	0.0298256	0	0	0.2552	0.00420408	0.00420551
ENSG00000005156	LIG3	17:34980493-35009743	14.8914	21.7221	17.2587	25.2856	17.9783	12.5604	14.6998
ENSG00000005175	RPAP3	12:47661248-47706061	36.1308	45.8639	44.4112	39.7618	39.7063	42.9056	41.6122
ENSG00000005187	ACSM3	16:20610242-20797581	3.8617	1.76547	1.79491	1.25443	3.01558	2.74555	2.58845
ENSG00000005189	AC004381.6	16:20806428-20849668	4.83824	5.82191	6.07989	8.20872	6.95028	5.31377	4.26426
ENSG00000005194	CIAPIN1	16:57428168-57447528	18.8175	28.4872	25.8698	26.6209	26.7735	30.0117	22.5371
ENSG00000005206	SPPL2B	19:2328614-2354806	19.2576	10.4705	15.4491	18.5855	15.836	14.2964	17.4143
ENSG00000005238	FAM214B	9:35104111-35116341	3.47312	2.20097	1.91555	2.98479	3.89038	3.16884	3.88274
ENSG00000005249	PRKAR2B	7:107044648-107161811	9.42668	6.99904	5.72183	5.31195	4.65316	4.77808	4.23872
ENSG00000005302	MSL3	X:11758158-11775753	5.6103	7.00233	5.41187	6.83585	6.68722	6.29219	6.27605
ENSG00000005339	CREBBP	16:3725053-3880726	30.0616	26.0768	21.7961	21.7155	17.5281	13.3114	12.7721
ENSG00000005379	BZRAP1	17:58301227-58328760	7.63777	2.36443	2.89359	3.85696	4.70081	3.22427	3.62977
ENSG00000005381	MPO	17:58269855-58280935	0	0	0	0	0	0	0
ENSG00000005421	PON1	7:95297675-95324707	0.161542	0.0544354	0.0374168	0.0272085	0.233163	0.0555957	0.16028
ENSG00000005436	GCFC2	2:75651999-75710989	7.76055	11.8343	10.9151	8.93762	11.6517	8.07311	10.0544
ENSG00000005448	WDR54	2:74421677-74425755	23.2651	17.3809	16.0436	18.0332	17.6701	21.1839	19.2659
ENSG00000005469	CROT	7:87345680-87399795	12.4064	7.91893	9.16572	9.16354	9.97577	7.89818	7.71824
ENSG00000005471	ABCB4	7:87401696-87480435	0.136063	0.0642223	0.0946289	0.097768	0.297849	0.0653704	0
ENSG00000005483	KMT2E	7:105014178-105114361	23.9926	21.6608	21.589	21.2264	20.2502	20.3274	17.9804
ENSG00000005486	RHBDD2	7:75842601-75888926	41.7261	23.1234	24.5144	27.8677	34.4462	35.0071	29.9739
ENSG00000005513	SOX8	16:981807-986979	2.96104	3.30789	2.98191	2.86487	2.88997	2.69974	2.42798
ENSG00000005700	IBTK	6:82169982-82247754	11.547	13.516	11.6455	11.9631	13.5906	11.8749	10.8776
ENSG00000005801	ZNF195	11:3339260-3379222	3.12929	5.33036	5.6423	4.54414	6.08597	5.41006	5.10395
ENSG00000005810	MYCBP2	13:77044654-77327050	33.4195	23.1798	25.021	25.6181	23.9034	25.1798	23.5372
ENSG00000005812	FBXL3	13:76992597-77027195	28.0228	30.8953	28.3858	27.1737	26.0066	22.9684	21.8926
ENSG00000005844	ITGAL	16:30472657-30523185	0.0335662	0.00961319	0.00644076	0.00643411	0.0179951	0	0.183904
ENSG00000005882	PDK2	17:50094736-50112152	42.2132	24.6537	19.4999	25.6003	26.7312	25.9387	22.8928
ENSG00000005889	ZFX	X:24149172-24216255	9.65287	6.44248	6.18534	5.21192	5.57626	6.91647	5.93923
ENSG00000005893	LAMP2	X:120427826-120469365	138.227	82.2059	110.952	119.287	112.737	102.42	87.3854
ENSG00000005961	ITGA2B	17:44372179-44389505	6.94246	2.43144	2.60463	3.34913	4.85973	6.05476	3.68764
ENSG00000005981	ASB4	7:95478443-95540232	0.0981258	0.0474362	0.00890285	0	0.0221982	0	0.0241009
ENSG00000006015	C19orf60	19:18588684-18592336	37.9218	36.9109	35.6421	43.2598	25.6549	36.2203	23.503
ENSG00000006016	CRLF1	19:18572219-18607741	26.1702	16.2065	21.877	24.5795	23.8709	23.4145	24.7008
ENSG00000006025	OSBPL7	17:47807371-47821834	8.05789	3.97618	3.96544	7.13549	4.78932	3.93541	6.48773
ENSG00000006042	TMEM98	17:32927909-32945106	19.7516	11.6011	13.3603	15.1838	13.213	13.2067	12.0429
ENSG00000006047	YBX2	17:7288251-7294615	0.0919571	0	0	0.0462769	0.0577302	0	0.0951118
ENSG00000006059	KRT33A	17:41346091-41350812	0	0	0	0	0	0	0
ENSG00000006062	MAP3K14	17:45263120-45317040	3.79266	5.33908	6.68804	7.51719	7.94816	6.24629	8.6603
ENSG00000006071	ABCC8	11:17392884-17476845	0.0797331	0.0105302	0	0	0.234784	0	0.106641
ENSG00000006116	CACNG3	16:24255552-24362801	0	0	0	0	0	0	0
ENSG00000006125	AP2B1	17:35578045-35726409	78.3325	102.384	93.1875	93.3541	81.9156	69.2814	61.3879
ENSG00000006128	TAC1	7:97731907-97740472	0	0	0	0	0	0	0
ENSG00000006194	ZNF263	16:3263799-3301401	17.835	19.658	17.6203	15.9267	16.6742	15.5814	15.7127
ENSG00000006210	CX3CL1	16:57372457-57385048	0	0	0.00288522	0.0206823	0.0128913	0.0559017	0.0139711
ENSG00000006282	SPATA20	17:50543057-50555852	23.8072	16.0548	18.7885	20.1851	21.5754	17.9639	23.4434
ENSG00000006327	TNFRSF12A	16:3018444-3022383	110.374	200.423	211.313	195.413	188.37	168.302	207.921
ENSG00000006377	DLX6	7:97005547-97011039	4.75815	5.25136	4.74386	4.42852	5.92593	4.02742	4.18749
ENSG00000006432	MAP3K9	14:70722525-70809534	6.19247	5.65775	5.55969	5.66852	6.00515	4.05596	5.02302
ENSG00000006451	RALA	7:39623482-39708124	55.4194	99.084	88.3174	79.5145	95.2668	87.8488	92.9402
ENSG00000006453	BAIAP2L1	7:98291650-98401068	27.6393	37.1938	32.551	32.4259	33.827	29.7991	30.9842
ENSG00000006459	KDM7A	7:140084745-140177035	1.48464	0.780038	0.742491	0.837064	0.836171	0.674869	0.913595
ENSG00000006468	ETV1	7:13891227-13991425	1.18393	1.37016	1.09508	2.26279	1.32972	0.830504	1.54941
ENSG00000006530	AGK	7:141551188-141655244	21.5528	26.1855	24.9051	22.0647	24.5365	21.8537	22.435
ENSG00000006534	ALDH3B1	11:68008577-68029282	24.3724	16.1999	17.9254	16.9711	19.5861	17.432	13.1289
ENSG00000006555	TTC22	1:54779711-54801267	5.52876	6.31253	5.74426	6.62675	5.41621	5.87473	5.26883
ENSG00000006576	PHTF2	7:77798791-77957503	21.6475	16.896	17.79	19.252	19.044	17.0451	14.1461
ENSG00000006606	CCL26	7:75769532-75789896	0.49331	0.647695	0.389482	0.755318	1.81909	0.653988	1.18205
ENSG00000006607	FARP2	2:241356242-241494841	11.5789	9.63056	9.6848	8.66168	9.28877	7.70293	6.19468
ENSG00000006611	USH1C	11:17493894-17544416	6.7489	4.85292	4.61438	7.1831	8.87724	7.00364	12.9893
ENSG00000006625	GGCT	7:30496620-30504844	157.84	202.267	178.513	168.976	179.3	184.906	171.169
ENSG00000006634	DBF4	7:87876215-87909541	28.2741	41.63	37.0613	33.4878	33.3099	29.9371	27.9689
ENSG00000006638	TBXA2R	19:3594505-3606840	0.919747	0.823153	0.69941	0.588674	0.790235	1.18772	1.23827
ENSG00000006659	LGALS14	19:39704305-39709444	0	0	0	0	0	0	0
ENSG00000006695	COX10	17:14069495-14208677	6.0762	8.56765	6.93756	7.08679	6.66965	6.00328	6.7497
ENSG00000006704	GTF2IRD1	7:74453789-74602604	15.2465	11.6132	14.3072	14.9876	15.7499	18.6825	15.3105
ENSG00000006712	PAF1	19:39385851-39391195	41.8431	50.1545	45.2773	43.1789	45.9696	45.6673	43.4829
ENSG00000006715	VPS41	7:38722962-38932394	69.6367	50.8623	48.1308	48.8077	45.0681	37.6503	30.1905
ENSG00000006740	ARHGAP44	17:12789538-12991643	8.53329	7.13585	6.00681	7.94299	6.66899	6.91989	4.6969
ENSG00000006744	ELAC2	17:12992390-13018187	25.5806	43.5577	40.6353	44.6217	32.3412	37.0836	33.7001
ENSG00000006747	SCIN	7:12570576-12660179	0.513437	0.145198	0.211434	0.208338	0.421881	0.143773	0.12441
ENSG00000006756	ARSD	X:2903969-2929351	0	0	0	0	0.00811716	0.00880927	0
ENSG00000006757	PNPLA4	X:7898246-7927739	10.685	12.9208	10.0751	10.524	12.3015	12.4304	13.8115
ENSG00000006788	MYH13	17:10298083-10373130	0	0	0	0.011278	0	0	0.00764179
ENSG00000006831	ADIPOR2	12:1688573-1788678	47.0864	38.3032	37.2488	36.4696	39.0166	36.7512	31.1632
ENSG00000006837	CDKL3	5:134286349-134371047	0.753179	0.575181	0.561692	0.544425	0.672798	0.682051	0.522858
ENSG00000007001	UPP2	2:157876701-158136154	0	0	0	0	0	0	0
ENSG00000007038	PRSS21	16:2817179-2826304	20.3489	16.6532	17.8292	23.6728	19.4661	18.6659	16.3262
ENSG00000007047	MARK4	19:45079287-45305283	17.4822	11.6702	11.5821	13.8508	17.3437	12.6066	12.668
ENSG00000007062	PROM1	4:15963075-16084378	0.0222004	0	0.0878907	0	0.0711718	0	0
ENSG00000007080	CCDC124	19:17933015-17943991	47.9291	70.5096	61.2072	61.4734	56.7685	67.0661	74.0443
ENSG00000007129	CEACAM21	19:41549517-41586844	0.158848	0.166791	0.052099	0	0	0.160782	0.0352358
ENSG00000007168	PAFAH1B1	17:2593209-2685615	73.004	104.59	92.9838	88.7301	83.6657	91.9274	73.3352
ENSG00000007171	NOS2	17:27756765-27800499	0.0206106	0	0	0.0204976	0.0202416	0.0277531	0
ENSG00000007174	DNAH9	17:11598430-11969748	0	0	0	0	0	0.0255234	0
ENSG00000007202	KIAA0100	17:28614439-28645454	38.179	39.0791	44.1903	41.7999	38.1045	33.9698	36.6559
ENSG00000007216	SLC13A2	17:28473292-28497781	0	0.0212793	0	0	0	0	0.0617258
ENSG00000007237	GAS7	17:9910608-10198551	2.73555	2.26963	2.56793	2.29461	2.49549	1.79319	1.42018
ENSG00000007255	TRAPPC6A	19:45162927-45178237	38.8581	11.4688	13.3388	20.5117	24.4474	20.3215	14.4583
ENSG00000007264	MATK	19:3777969-3802129	0	0	0	0.121963	0.0779101	0.16846	0.296161
ENSG00000007306	CEACAM7	19:41673306-41706976	0	0	0	0	0	0	0
ENSG00000007314	SCN4A	17:63938553-63972918	0.101114	0.0169738	0.00424726	0.0254566	0.0211812	0.0229908	0.0402495
ENSG00000007341	ST7L	1:112523517-112620825	11.9954	14.0566	12.9987	15.01	14.9047	13.3208	11.1795
ENSG00000007350	TKTL1	X:154295670-154330350	0	0	0	0	0	0	0
ENSG00000007372	PAX6	11:31784791-31817961	6.16022	3.51986	4.15901	4.07255	4.94996	5.81264	5.19185
ENSG00000007376	RPUSD1	16:784973-788397	16.5892	21.1948	20.8884	17.5194	17.3494	19.4607	19.2575
[truncated: 58,747 more rows]
